# Supplementary material for: Regioselective annulation of nitrosopyridine with alkynes: straightforward synthesis of N-oxide-imidazopyridines
Source: Royal Society of Chemistry journal article supplement (doi:10.1039/c5cc00533g), 2015-01-01

## Regioselective Annulation of Nitrosopyridine with Alkynes: Straightforward Synthesis of *N*-Oxide-imidazopyridines

Srimanta Manna,<sup>[a,b]</sup> Rishikesh Narayan,<sup>[b]</sup> Christopher Golz,<sup>[c]</sup> Carsten Strohmann<sup>[c]</sup> and Andrey P. Antonchick\*<sup>[a,b]</sup>

E-mail: [andrey.antonchick@mpi-dortmund.mpg.de](mailto:andrey.antonchick@mpi-dortmund.mpg.de)

[a] Abteilung Chemische Biologie, Max-Planck-Institut für Molekulare Physiologie, Otto-Hahn-Strasse 11, 44227 Dortmund (Germany)

[b] Fakultät Chemie und Chemische Biologie, Technische Universität Dortmund, Chemische Biologie, Otto-Hahn-Strasse 6, 44221 Dortmund (Germany)

[c] Fakultät Chemie und Chemische Biologie, Technische Universität Dortmund, Anorganische Chemie, Otto-Hahn-Strasse 6, 44221 Dortmund (Germany)

### Table of contents:

|                                                                             |    |
|-----------------------------------------------------------------------------|----|
| General information                                                         | 2  |
| Optimization of reaction conditions                                         | 3  |
| General procedure for the imidazo[1,2- <i>a</i> ]pyridine 1-oxide synthesis | 4  |
| Analytical data                                                             | 5  |
| Reaction mechanism studies                                                  | 23 |
| Crystallographic data for the compound 3h                                   | 25 |
| Copies of <sup>1</sup> H, <sup>13</sup> C, 1D-NOE spectra                   | 27 |

### General information:

Unless otherwise noted, all commercially available compounds were used as provided without further purification. Solvents for chromatography were technical grade. Dry solvents were purified by the Solvent Purification System *M-BRAUN Glovebox Technology SPS-800*. Analytical thin layer chromatography (TLC) was performed on Merck silica gel *aluminium plates* with *F-254 indicator*, visualised by irradiation with UV light. Column chromatography was performed using silica gel Merck 60 (particle size 0.040-0.063 mm). Solvent mixtures are understood as volume/volume.

$^1\text{H}$ -NMR and  $^{13}\text{C}$ -NMR were recorded on a *Bruker DRX400 (400 MHz)*, *DRX500 (500 MHz)* and *DRX600 (600 MHz)* spectrometer in  $\text{CDCl}_3$  ( $\delta = 7.26$  ppm for  $^1\text{H}$ ,  $= 77.16$  ppm for  $^{13}\text{C}$ ). Data are reported in the following order: chemical shift ( $\delta$ ) in ppm; multiplicities are indicated s (singlet), d (doublet), t (triplet), q (quartet), m (multiplet); coupling constants ( $J$ ) are given in Hertz (Hz). High resolution mass spectra were recorded on a LTQ Orbitrap mass spectrometer coupled to an *Acceka HPLC-System* (HPLC column: *Hypersyl GOLD*, 50 mm  $\times$  1 mm, 1.9  $\mu\text{m}$ ). Fourier transform infrared spectroscopy (FT- IR) spectra were obtained with a Bruker Tensor 27 spectrometer (ATR, neat) and are reported in terms of frequency of absorption ( $\text{cm}^{-1}$ ). Chemical yields refer to isolated pure substances. Nitrosopyridine were prepared according to literature procedures and characteristic data are matching with reported products.<sup>1</sup>

---

<sup>1</sup> (a) F. Li, B. Yang, M. J. Miller, J. Zajicek, B. C. Noll, U. Möllmann, H.-M. Dahse and P. A. Miller; *Org. Lett.*, **2007**, 9, 2923-2926; (b) E. C. Taylor, C.-P. Tseng, and J. B. Rampal; *J. Org. Chem.*, **1982**, 47, 552-55.

## Optimization of the reaction conditions<sup>[a]</sup>

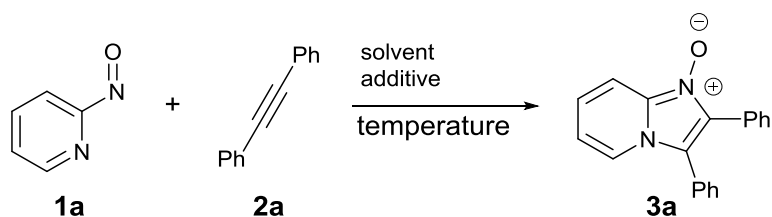

| Entry             | Solvent                                     | Additive (equiv)                      | Time [h] | Yield [%] <sup>[b]</sup> |
|-------------------|---------------------------------------------|---------------------------------------|----------|--------------------------|
| 1                 | CH <sub>3</sub> CN                          | -                                     | 24       | 20                       |
| 2                 | CH <sub>2</sub> Cl <sub>2</sub>             | -                                     | 24       | 45                       |
| 3                 | CHCl <sub>3</sub>                           | -                                     | 12       | 65                       |
| 4                 | H <sub>2</sub> O                            | -                                     | 12       | n.d.                     |
| 5                 | MeOH                                        | -                                     | 12       | n.d.                     |
| 6                 | CF <sub>3</sub> CH <sub>2</sub> OH          | -                                     | 24       | 40                       |
| 7                 | HFIP                                        | -                                     | 12       | 86                       |
| 8                 | EtOAc                                       | -                                     | 12       | n.d.                     |
| 9                 | EtOH                                        | -                                     | 12       | n.d.                     |
| 10                | C <sub>6</sub> H <sub>6</sub>               | -                                     | 12       | n.d.                     |
| 11                | HFIP: CH <sub>2</sub> Cl <sub>2</sub> (1:1) | CF <sub>3</sub> CO <sub>2</sub> H (2) | 12       | 50                       |
| 12                | MeOH                                        | CH <sub>3</sub> CO <sub>2</sub> H (2) | 12       | n.d.                     |
| 13                | CHCl <sub>3</sub>                           | CF <sub>3</sub> CO <sub>2</sub> H (2) | 12       | 20                       |
| 14                | CHCl <sub>3</sub>                           | CF <sub>3</sub> CO <sub>2</sub> H (2) | 12       | 15                       |
| 15                | HFIP                                        | CF <sub>3</sub> CO <sub>2</sub> H (2) | 12       | 54                       |
| 16 <sup>[c]</sup> | HFIP                                        | -                                     | 12       | 70                       |

[a] Reaction conditions: 1a (0.25 mmol), 2a (0.28 mmol) in solvent (1.0 mL) at 40°C for 12 h.

[b] Isolated yields [c] Reaction was carried out at ambient temperature. n.d. = not determined.

HFIP = 1,1,1,3,3,3-hexafluoro-2-propanol.

Initially, the reaction of 2-nitrosopyridine (**1a**) with diphenylacetylene (**2a**) was chosen as model reaction to investigate the possibility of cycloaddition in the absence of transition metal catalyst. At first, we tried to utilize the polarity of the solvent to polarize the nitroso-group (Table 1, entries 1-10). Hence, in the initial experiments, we stirred the substrates together in CH<sub>2</sub>Cl<sub>2</sub> and CH<sub>3</sub>CN at 40°C. We were absolutely delighted to obtain 45% and 20% of product **3a** in CH<sub>2</sub>Cl<sub>2</sub> and CH<sub>3</sub>CN respectively.

These results prompted us to further screen various solvents. Chloroform proved to be a better solvent compared to CH<sub>2</sub>Cl<sub>2</sub> with a yield of 65%. However, no desired product could be detected in EtOAc and benzene. Further screening of polar protic solvents revealed 1,1,1,3,3,3-hexafluoro-2-propanol (HFIP) to be the best solvent with a yield of 86%. Other similar solvents like CF<sub>3</sub>CH<sub>2</sub>OH were less effective (40% yield). Surprisingly, MeOH and ethanol completely prevented the cycloaddition and only led to dimerization of **1a**. We also tried HFIP/CH<sub>2</sub>Cl<sub>2</sub> mixture as solvent but the result was found to be inferior. At this stage, we tried some acid additives such as CF<sub>3</sub>CO<sub>2</sub>H and AcOH to further improve the efficiency of the reaction (entries 12-15). However, they were found to be not useful. When the reaction was carried out at ambient temperature, the yield of **3a** decreased to 70%. An increase in temperature to 60°C also had a deleterious effect on the yield (52%).

**General procedure for the imidazo[1,2-*a*]pyridine 1-oxide synthesis:**

To a screw cap reaction vial 2-nitrosopyridine derivatives (0.25 mmol, 1 equiv), alkyne (0.28 mmol, 1.1 equiv), and 1,1,1,3,3,3-hexafluoro-2-propanol (HFIP, 1.0 mL) were added under air. The reaction mixture was stirred vigorously at RT-60 °C until completion. The crude reaction mixture was concentrated under reduced pressure and subsequently purified by flash column chromatography over silica gel using dichloromethane/methanol as an eluent system.

## Analytical data

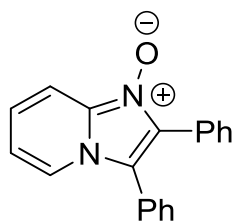

### 2,3-Diphenylimidazo[1,2-a]pyridine 1-oxide (3a)

Prepared according to the general procedure and the product was obtained as light yellow solid in 86% yield (62 mg), mp 185-189 °C. This reaction was carried out in 4 mmol scale and the pure product was obtained in 75% yield.

**<sup>1</sup>H NMR (400 MHz, CDCl<sub>3</sub>)** δ 8.01 – 7.91 (m, 2H), 7.75 – 7.68 (m, 2H), 7.49 – 7.42 (m, 3H), 7.39 – 7.32 (m, 2H), 7.32 – 7.27 (m, 3H), 7.20 (ddd, *J* = 9.1, 6.7, 0.8 Hz, 1H), 6.78 ppm (td, *J* = 6.9, 1.1 Hz, 1H).

**<sup>13</sup>C NMR (101 MHz, CDCl<sub>3</sub>)** δ 133.97, 132.91, 130.51, 130.13, 129.75, 129.71, 128.98, 128.26, 126.72, 126.50, 124.92, 122.60, 117.28, 114.48, 112.87 ppm.

**FT-IR:**  $\tilde{\nu}$  = 3015, 2926, 1630, 1506, 1514, 1450, 1423, 1371, 1279, 1113 cm<sup>-1</sup>.

**HRMS:** calc. for [M+H]<sup>+</sup> C<sub>19</sub>H<sub>15</sub>N<sub>2</sub>O: 287.11789 found: 287.11743.

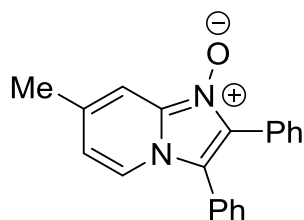

### 7-Methyl-2,3-diphenylimidazo[1,2-a]pyridine 1-oxide (3b)

Prepared according to the general procedure and the product was obtained as light yellow solid in 67% yield (50 mg), mp 174-178 °C;

**<sup>1</sup>H NMR (400 MHz, CDCl<sub>3</sub>)** 7.87 (d, *J* = 7.1 Hz, 1H), 7.68-7.65 (m, 3H), 7.47 – 7.41 (m, 3H), 7.34 – 7.29 (m, 2H), 7.29 – 7.25 (m, 3H), 6.66 (dd, *J* = 7.1, 1.1 Hz, 1H), 2.40 (s, 3H).

**<sup>13</sup>C NMR (101 MHz, CDCl<sub>3</sub>)** δ 137.39, 134.35, 132.51, 130.43, 130.07, 129.66, 128.90, 128.20, 126.64, 126.45, 122.10, 117.37, 116.82, 110.70, 21.45 ppm.

**FT-IR:**  $\tilde{\nu}$  = 2999, 1635, 1505, 1444, 1457, 1241, 1174, 1040 cm<sup>-1</sup>.

**HRMS:** calc. for [M+H]<sup>+</sup> C<sub>20</sub>H<sub>17</sub>N<sub>2</sub>O: 301.13354 found: 301.13354.

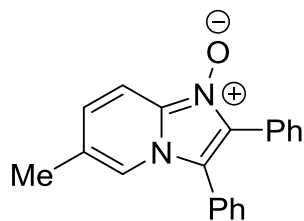

### 6-Methyl-2,3-diphenylimidazo[1,2-a]pyridine 1-oxide (3c)

Prepared according to the general procedure and the product was obtained as light yellow solid in 82% yield (62 mg), mp 137-140 °C;

**<sup>1</sup>H NMR (300 MHz, CDCl<sub>3</sub>)** δ 7.83 (d, *J* = 9.2 Hz, 1H), 7.73 (s, 1H), 7.66 (dd, *J* = 6.7, 3.0 Hz, 2H), 7.49 – 7.42 (m, 3H), 7.33 (dd, *J* = 6.7, 3.0 Hz, 2H), 7.30 – 7.24 (m, 3H), 7.10 (d, *J* = 9.2 Hz, 1H), 2.25 ppm (s, 3H).

**<sup>13</sup>C NMR (75 MHz, CDCl<sub>3</sub>)** δ 133.30, 132.50, 130.57, 130.07, 129.71, 128.89, 128.63, 128.21, 126.77, 126.49, 124.73, 119.97, 116.99, 112.05, 18.42 ppm.

**FT-IR:**  $\tilde{\nu}$  = 3063, 2960, 1645, 1513, 1380, 1369, 1259, 1182, 1068 cm<sup>-1</sup>.

**HRMS:** calc. for [M+H]<sup>+</sup> C<sub>20</sub>H<sub>17</sub>N<sub>2</sub>O: 301.134354 found: 301.13439.

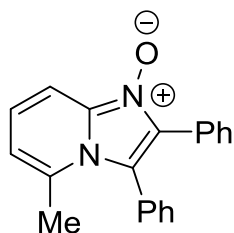

### 5-Methyl-2,3-diphenylimidazo[1,2-a]pyridine 1-oxide (3d)

Prepared according to the general procedure and the product was obtained as light yellow solid in 87% yield (65 mg), mp 163-165 °C;

**<sup>1</sup>H NMR (300 MHz, CDCl<sub>3</sub>)** δ 7.86 (d, *J* = 9.1 Hz, 1H), 7.56 (dd, *J* = 6.6, 3.0 Hz, 2H), 7.50 – 7.30 (m, 5H), 7.28 – 7.14 (m, 4H), 6.57 (d, *J* = 6.8 Hz, 1H), 2.06 ppm (s, 3H).

**<sup>13</sup>C NMR (75 MHz, CDCl<sub>3</sub>)** δ 136.66, 135.45, 133.80, 133.01, 130.19, 130.00, 129.32, 128.82, 128.12, 128.02, 126.32, 125.60, 118.63, 115.95, 110.71, 21.60 ppm.

**FT-IR:**  $\tilde{\nu}$  = 3064, 2955, 1633, 1517, 1393, 1336, 1221, 1106 cm<sup>-1</sup>.

**HRMS:** calc. for [M+H]<sup>+</sup> C<sub>20</sub>H<sub>17</sub>N<sub>2</sub>O: 301.13354 found: 301.13353.

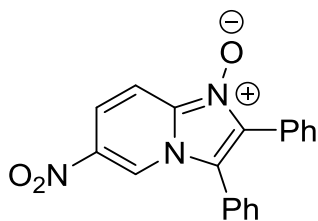

### 6-Nitro-2,3-diphenylimidazo[1,2-a]pyridine 1-oxide (3e)

Prepared according to the general procedure using and the product was obtained as light yellow solid in 96% yield (80 mg), mp 204-209 °C;

**<sup>1</sup>H NMR (300 MHz, CDCl<sub>3</sub>)** δ 8.99 (s, 1H), 8.00 (d, *J* = 10.0 Hz, 1H), 7.84 (dd, *J* = 10.0, 1.6 Hz, 1H), 7.72 (dd, *J* = 7.1, 2.1 Hz, 2H), 7.60 – 7.52 (m, 3H), 7.42-7.34 ppm (m, 5H).

**<sup>13</sup>C NMR (75 MHz, CDCl<sub>3</sub>)** δ 138.84, 136.33, 133.33, 130.87, 130.42, 130.25, 130.06, 129.92, 128.52, 125.33, 125.08, 123.65, 120.32, 117.83, 113.28 ppm.

**FT-IR:**  $\tilde{\nu}$  = 3060, 2996, 1726, 1605, 1503, 1369, 1325, 1126, 1075 cm<sup>-1</sup>.

**HRMS:** calc. for [M+H]<sup>+</sup> C<sub>19</sub>H<sub>14</sub>N<sub>3</sub>O<sub>3</sub>: 332.10297 found: 332.10374.

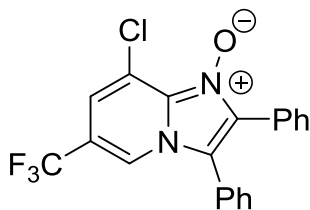

### 8-Chloro-2,3-diphenyl-6-(trifluoromethyl)imidazo[1,2-a]pyridine 1-oxide (3f)

Prepared according to the general procedure and the product was obtained as light yellow solid in 64% yield (62 mg), mp 193-196 °C;

**<sup>1</sup>H NMR (500 MHz, CDCl<sub>3</sub>)** δ 8.10 (s, 1H), 7.72 – 7.68 (m, 2H), 7.58 – 7.52 (m, 3H), 7.39 – 7.36 (m, 2H), 7.34 (dd, *J* = 5.7, 4.6 Hz, 3H), 7.15 ppm (s, 1H).

**<sup>13</sup>C NMR (126 MHz, CDCl<sub>3</sub>)** δ 136.44, 130.88, 130.52, 130.28, 130.24, 129.90, 129.79, 128.37, 125.29, 125.25, 123.46, 123.12, 122.38 (q, *J* = 272.52 Hz), 120.69, 120.62 (q, *J* = 5.9 Hz), 118.49, 118.21 ppm.

**FT-IR:**  $\tilde{\nu}$  = 3050, 2940, 1636, 1531, 1416, 1309, 1231, 1121, 1074 cm<sup>-1</sup>.

**HRMS:** calc. for [M+H]<sup>+</sup> C<sub>21</sub>H<sub>12</sub>ClF<sub>3</sub>N<sub>2</sub>O: 389.05903 found: 389.06982.

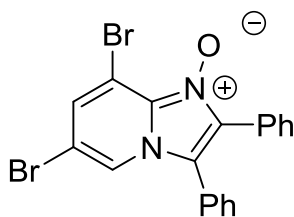

### 6,8-Dibromo-2,3-diphenylimidazo[1,2-a]pyridine 1-oxide (3g)

Prepared according to the general procedure and the product was obtained as light yellow solid in 81% yield (90 mg), mp 171-175 °C;

**<sup>1</sup>H NMR (500 MHz, CDCl<sub>3</sub>)** δ 7.94 (d, *J* = 1.3 Hz, 1H), 7.70 – 7.66 (m, 2H), 7.52 – 7.49 (m, 3H), 7.36 – 7.32 (m, 3H), 7.31 – 7.27 ppm (m, 3H).

**<sup>13</sup>C NMR (126 MHz, CDCl<sub>3</sub>)** δ 134.97, 130.99, 130.55, 130.48, 130.15, 130.03, 129.37, 129.00, 128.17, 125.70, 125.65, 121.75, 118.18, 108.12, 107.55 ppm.

**FT-IR:**  $\tilde{\nu}$  = 3035, 2980, 1602, 1599, 1504, 1488, 1361, 1329, 1244, 1140, 1031 cm<sup>-1</sup>.

**HRMS:** C<sub>19</sub>H<sub>13</sub><sup>79</sup>Br<sub>2</sub>N<sub>2</sub>O [M+H]<sup>+</sup> calc.: 442.93891 found: 442.94002; C<sub>19</sub>H<sub>13</sub><sup>79</sup>Br<sup>81</sup>BrN<sub>2</sub>O [M+H]<sup>+</sup> calc.: 444.94687 found: 444.93711, C<sub>19</sub>H<sub>13</sub><sup>81</sup>Br<sub>2</sub>N<sub>2</sub> [M+H]<sup>+</sup> calc.: 446.93482 found : 446.93442.

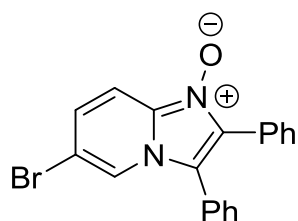

### 6-Bromo-2,3-diphenylimidazo[1,2-*a*]pyridine 1-oxide (3h)

Prepared according to the general procedure and the product was obtained as light yellow solid in 95% yield (87 mg), mp 184-187 °C;

**<sup>1</sup>H NMR (300 MHz, CDCl<sub>3</sub>)** δ 8.09 (s, 1H), 7.92 (d, *J* = 9.6 Hz, 1H), 7.70 (dd, *J* = 6.7, 3.0 Hz, 2H), 7.51 (dd, *J* = 6.5, 3.6 Hz, 3H), 7.40 – 7.28 ppm (m, 6H).

**<sup>13</sup>C NMR (75 MHz, CDCl<sub>3</sub>)** δ 133.55, 132.85, 130.53, 130.32, 130.16, 130.01, 129.47, 128.73, 128.46, 126.01, 125.82, 122.51, 117.87, 113.75, 109.76 ppm.

**FT-IR:**  $\tilde{\nu}$  = 3096, 3004, 1625, 1510, 1376, 1355, 1175, 1078 cm<sup>-1</sup>.

**HRMS:** calc. for [M+H]<sup>+</sup> C<sub>19</sub>H<sub>14</sub><sup>79</sup>BrN<sub>2</sub>O: 365.03004 found: 365.02840. HRMS: calc. for [M+H]<sup>+</sup> C<sub>19</sub>H<sub>14</sub><sup>79</sup>BrN<sub>2</sub>O: 367.02726 found: 367.02636.

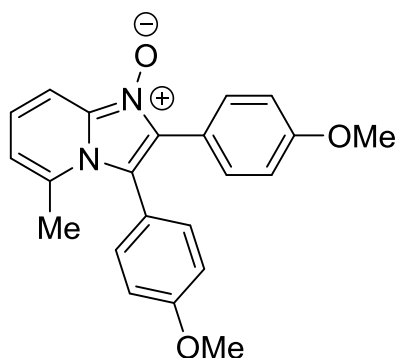

### 2,3-Bis(4-methoxyphenyl)-5-methylimidazo[1,2-*a*]pyridine 1-oxide (3i)



Prepared according to the general procedure and the product was obtained as light yellow solid in 87% yield (78 mg), mp 90-93 °C;

**<sup>1</sup>H NMR (500 MHz, CDCl<sub>3</sub>)** δ 7.81 (d, *J* = 9.1 Hz, 1H), 7.54 (d, *J* = 8.8 Hz, 2H), 7.26 (d, *J* = 8.9 Hz, 2H), 7.08 (d, *J* = 8.8 Hz, 2H), 6.85 (d, *J* = 8.8 Hz, 2H), 6.73 (t, *J* = 8.8 Hz, 2H), 6.48 (d, *J* = 6.8 Hz, 2H), 3.80 (s, 3H), 3.69 (s, 3H), 2.04 ppm (s, 3H).

**<sup>13</sup>C NMR (126 MHz, CDCl<sub>3</sub>)** δ 160.62, 159.66, 136.43, 135.16, 134.22, 133.57, 131.38, 124.81, 121.42, 118.94, 117.75, 115.51, 113.49, 113.46, 110.55, 55.35, 55.15, 21.51 ppm.

**FT-IR:**  $\tilde{\nu}$  = 2996, 2837, 1609, 1519, 1494, 1395, 1293, 1247, 1160, 1027 cm<sup>-1</sup>.

**HRMS:** calc. for [M+H]<sup>+</sup> C<sub>22</sub>H<sub>21</sub>N<sub>2</sub>O<sub>3</sub>: 361.15467 found: 361.15525.

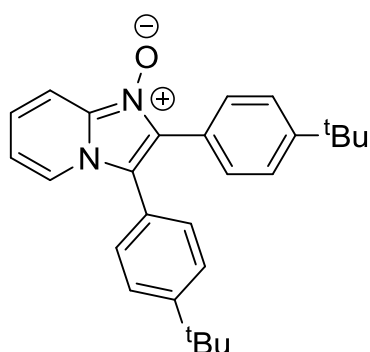

### 2,3-Bis(4-(*tert*-butyl)phenyl)imidazo[1,2-*a*]pyridine 1-oxide (3j)

Prepared according to the general procedure and the product was obtained as light yellow solid in 95% yield (95 mg), mp 88-92 °C;

**<sup>1</sup>H NMR (200 MHz, CDCl<sub>3</sub>)** δ 8.01 – 7.87 (m, 2H), 7.76 – 7.64 (m, 2H), 7.54 – 7.45 (m, 2H), 7.39 – 7.28 (m, 4H), 7.20 (ddd, *J* = 9.4, 6.7, 0.9 Hz, 1H), 6.83 – 6.72 (m, 1H), 1.36 (s, 9H), 1.29 ppm (s, 9H).

**<sup>13</sup>C NMR (50 MHz, CDCl<sub>3</sub>)** δ 152.92, 151.88, 133.92, 132.90, 130.29, 129.73, 126.64, 125.29, 124.69, 123.86, 123.67, 122.78, 117.19, 114.24, 112.82, 35.02, 34.85, 31.35, 31.33 ppm.

**FT-IR:**  $\tilde{\nu}$  = 2962, 2915, 1605, 1492, 1363, 1283, 1177, 1089 cm<sup>-1</sup>.

**HRMS:** calc. for [M+H]<sup>+</sup> C<sub>27</sub>H<sub>31</sub>N<sub>2</sub>O: 399.24310 found: 399.24309.

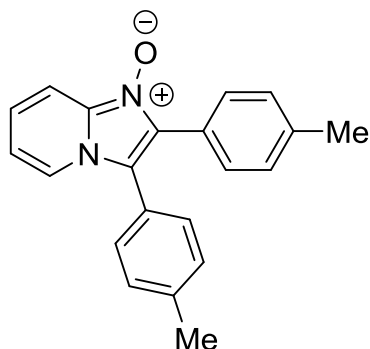

### 2,3-Di-*p*-tolylimidazo[1,2-*a*]pyridine 1-oxide (3k)

Prepared according to the general procedure and the product was obtained as light yellow solid in 88% yield (69 mg), mp 150-153 °C;

**<sup>1</sup>H NMR (300 MHz, CDCl<sub>3</sub>)** δ 8.00 (d, *J* = 7.0 Hz, 1H), 7.96 (d, *J* = 9.2 Hz, 1H), 7.65 (d, *J* = 8.2 Hz, 2H), 7.31-7.28 (m, 4H), 7.26 – 7.21 (m, 1H), 7.17 (d, *J* = 8.0 Hz, 2H), 6.86-8.81 (m, 6.9, 1H), 2.45 (s, 3H), 2.35 ppm(s, 3H).

**<sup>13</sup>C NMR (75 MHz, CDCl<sub>3</sub>)** δ 139.84, 138.92, 133.83, 132.75, 130.36, 130.30, 129.89, 128.95, 124.97, 123.60, 123.50, 122.62, 117.19, 114.32, 112.59, 21.47, 21.44 ppm.

**FT-IR:**  $\tilde{\nu}$  = 2988, 2921, 1620, 157, 1407, 1360, 1232, 1110 cm<sup>-1</sup>.

**HRMS:** calc. for [M+H]<sup>+</sup> C<sub>21</sub>H<sub>19</sub>N<sub>2</sub>O: 315.14919 found: 315.15023.

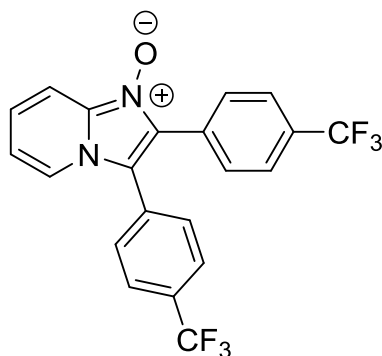

### 2,3-Bis(4-(trifluoromethyl)phenyl)imidazo[1,2-*a*]pyridine 1-oxide (3l)

Prepared according to the general procedure at 60 °C and the product was obtained as light yellow solid in 77% yield (81 mg), mp 120-125 °C;

**<sup>1</sup>H NMR (300 MHz, CDCl<sub>3</sub>)** δ 8.00 (d, *J* = 8.6 Hz, 2H), 7.85 (d, *J* = 8.1 Hz, 2H), 7.78 (d, *J* = 8.2 Hz, 2H), 7.61 (d, *J* = 8.2 Hz, 2H), 7.54 (d, *J* = 8.1 Hz, 2H), 7.32 (dd, *J* = 9.5, 6.8 Hz, 1H), 6.91 ppm (t, *J* = 7.4 Hz, 1H).

**<sup>13</sup>C NMR (75 MHz, CDCl<sub>3</sub>)** δ 134.73, 132.33, 132.18, 131.89 (q, *J* = 31.02 Hz), 131.41 (q, *J* = 30.68 Hz), 130.97, 130.51, 130.03, 129.67, 127.02 (q, *J* = 3.6 Hz), 126.16, 125.53 (q, *J* = 3.7 Hz), 122.12 (q, *J* = 271.09 Hz), 121.82 (q, *J* = 272.35 Hz), 116.30, 115.55, 113.31 ppm.

**FT-IR:**  $\tilde{\nu}$  = 3158, 2950, 1620, 1413, 1320, 1159, 1008 cm<sup>-1</sup>.

**HRMS:** calc. for [M+H]<sup>+</sup> C<sub>21</sub>H<sub>13</sub>N<sub>2</sub>OF<sub>6</sub>: 423.09266 found: 423.09283.

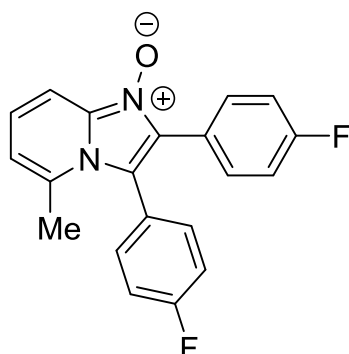

**2,3-Bis(4-fluorophenyl)-5-methylimidazo[1,2-a]pyridine 1-oxide (3m)**

Prepared according to the general procedure at 60 °C and the product was obtained as light yellow solid in 91 % yield (77 mg), mp 117-120 °C;

**<sup>1</sup>H NMR (500 MHz, CDCl<sub>3</sub>)**  $\delta$  7.89 (d,  $J$  = 9.1 Hz, 1H), 7.62 – 7.54 (m, 2H), 7.42 – 7.36 (m, 2H), 7.19 – 7.13 (m, 1H), 7.09 (t,  $J$  = 8.5 Hz, 2H), 6.95 (t,  $J$  = 8.7 Hz, 2H), 6.55 (d,  $J$  = 6.8 Hz, 1H), 2.07 ppm (s, 3H).

**<sup>13</sup>C NMR (126 MHz, CDCl<sub>3</sub>)** 163.63 (d,  $J$  = 251.80 Hz), 162.87 (d,  $J$  = 249.6 Hz), 136.28, 135.49, 134.87 (d,  $J$  = 8.4 Hz), 133.31, 132.17 (d,  $J$  = 8.4 Hz), 125.46 (d,  $J$  = 3.7 Hz), 125.32, 122.47 (d,  $J$  = 3.3 Hz), 117.10, 115.58, 115.52 (d,  $J$  = 21.8 Hz), 115.30 (d,  $J$  = 21.7 Hz), 111.03 ppm.

**FT-IR:**  $\tilde{\nu}$  = 3093, 3051, 1637, 1595, 1517, 1493, 1377, 1222, 1158, 1070 cm<sup>-1</sup>.

**HRMS:** calc. for [M+H]<sup>+</sup> C<sub>20</sub>H<sub>15</sub>N<sub>2</sub>OF<sub>2</sub>: 337.11470 found: 337.11470.

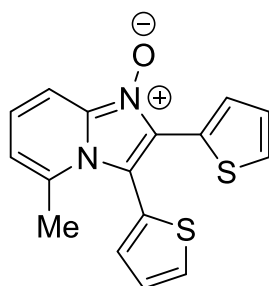

**5-Methyl-2,3-di(thiophen-2-yl)imidazo[1,2-a]pyridine 1-oxide (3n)**

Prepared according to the general procedure and the product was obtained as light yellow solid in 92% yield (72 mg), mp 166-169 °C;

**<sup>1</sup>H NMR (500 MHz, CDCl<sub>3</sub>)**  $\delta$  7.86 (d,  $J$  = 9.0 Hz, 1H), 7.68 (dd,  $J$  = 5.3, 1.2 Hz, 1H), 7.38 (dd,  $J$  = 5.1, 1.1 Hz, 1H), 7.34 – 7.32 (m, 1H), 7.22 (dd,  $J$  = 5.3, 3.5 Hz, 1H), 7.16 (dd,  $J$  = 9.0,

6.9 Hz, 1H), 7.11 (dd,  $J = 3.9, 1.0$  Hz, 1H), 6.93 (dd,  $J = 5.0, 3.9$  Hz, 1H), 6.56 (d,  $J = 6.8$  Hz, 1H), 2.28 ppm(s, 3H).

**$^{13}\text{C}$  NMR (126 MHz,  $\text{CDCl}_3$ )**  $\delta$  136.85, 135.90, 134.89, 131.54, 130.97, 129.70, 128.55, 127.63, 127.41, 127.33, 126.25, 125.29, 116.28, 110.52, 106.36, 20.14 ppm.

**FT-IR:**  $\tilde{\nu} = 3055, 2960, 1627, 1537, 1441, 1421, 1387, 1197, 1151, 1035\text{ cm}^{-1}$ .

**HRMS:** calc. for  $[\text{M}+\text{H}]^+ \text{C}_{16}\text{H}_{13}\text{N}_2\text{OS}_2$ : 313.04638 found: 313.04711.

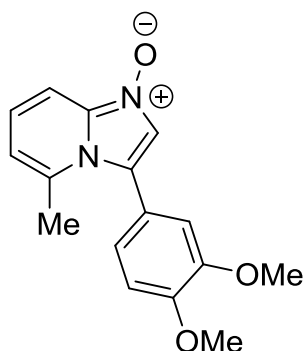

### 3-(3,4-Dimethoxyphenyl)-5-methylimidazo[1,2-*a*]pyridine 1-oxide (3o)

Prepared according to the general procedure and the product was obtained as light yellow solid in 74% yield (53 mg), mp 63-66 °C;

**$^1\text{H}$  NMR (500 MHz,  $\text{CDCl}_3$ )**  $\delta$  7.81 (d,  $J = 9.1$  Hz, 1H), 7.61 (s, 1H), 7.17 (dd,  $J = 9.1, 6.8$  Hz, 1H), 6.98 (dd,  $J = 8.2, 2.0$  Hz, 1H), 6.89 (m, 2H), 6.55 (d,  $J = 6.8$  Hz, 1H), 3.92 (s, 3H), 3.85 (s, 3H), 2.15 ppm (s, 3H).

**$^{13}\text{C}$  NMR (126 MHz,  $\text{CDCl}_3$ )**  $\delta$  150.59, 148.25, 137.10, 135.59, 125.78, 125.21, 124.43, 121.35, 120.69, 115.51, 115.12, 110.60, 110.31, 56.22, 56.10, 21.10 ppm.

**FT-IR:**  $\tilde{\nu} = 2954, 2931, 1640, 1582, 1461, 1250, 1233, 1130\text{ cm}^{-1}$ .

**HRMS:** calc. for  $[\text{M}+\text{H}]^+ \text{C}_{16}\text{H}_{17}\text{N}_2\text{O}_3$ : 285.12337 found: 285.12435.

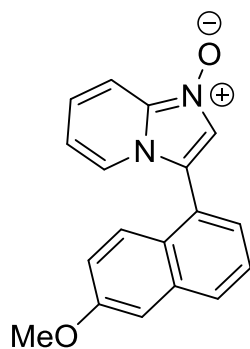

### 3-(6-Methoxynaphthalen-1-yl)imidazo[1,2-*a*]pyridine 1-oxide (3p)

Prepared according to the general procedure and the product was obtained as light yellow solid in 87% yield (63 mg), mp 119-122 °C;

**<sup>1</sup>H NMR (300 MHz, CDCl<sub>3</sub>)** δ 8.22 (d, *J* = 7.1 Hz, 1H), 7.91-7.84 (m, 3H), 7.82 – 7.73 (m, 2H), 7.48 (dd, *J* = 8.4, 1.5 Hz, 1H), 7.25 – 7.13 (m, 3H), 6.84 (t, *J* = 6.8 Hz, 1H), 3.92 (s, 3H) ppm.

**<sup>13</sup>C NMR (75 MHz, CDCl<sub>3</sub>)** δ 158.89, 134.92, 134.36, 129.71, 128.81, 128.34, 128.08, 126.00, 125.12, 123.20, 122.92, 121.05, 121.00, 120.28, 114.64, 112.89, 105.84, 55.51 ppm.

**FT-IR:**  $\tilde{\nu}$  = 3042, 2929, 1628, 1607, 1416, 1394, 1113, 1035 cm<sup>-1</sup>.

**HRMS:** calc. for [M+H]<sup>+</sup> C<sub>18</sub>H<sub>15</sub>N<sub>2</sub>O<sub>2</sub>: 291.11280 found: 291.11361.

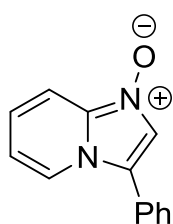

### 3-Phenylimidazo[1,2-*a*]pyridine 1-oxide (3q)

Prepared according to the general procedure and the products were formed in 2:1 regioisomeric ratio in 76% combined yield and the major product could be isolated as light yellow solid in 40% yield (21 mg) (mp 115-117 °C) in pure form which was fully characterized. The identity of the minor product in case of reaction with phenylacetylene has been confirmed by comparison of the NMR data of the corresponding deoxygenated product with the literature known data.;

**<sup>1</sup>H NMR (400 MHz, CDCl<sub>3</sub>+ CD<sub>3</sub>OD)** δ 8.20 (d, *J* = 7.0 Hz, 1H), 7.93 (d, *J* = 9.2 Hz, 1H), 7.79 (s, 1H), 7.60 – 7.48 (m, 5H), 7.34 – 7.27 (m, 1H), 6.90 ppm (t, *J* = 7.0 Hz, 1H).

**<sup>13</sup>C NMR (101 MHz, CDCl<sub>3</sub>)** δ 134.67, 130.01, 129.80, 128.82, 126.06, 125.93, 123.25, 122.81, 121.12, 114.95, 112.93 ppm.

**FT-IR:**  $\tilde{\nu}$  = 3052, 2954, 1641, 1474, 1416, 1327, 1147cm<sup>-1</sup>.

**HRMS:** calc. for [M+H]<sup>+</sup> C<sub>13</sub>H<sub>11</sub>N<sub>2</sub>O: 211.08659 found: 211.08659.

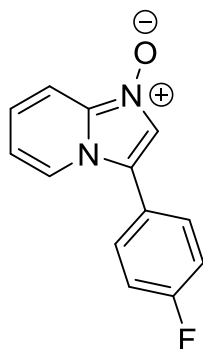

### 3-(4-Fluorophenyl)imidazo[1,2-*a*]pyridine 1-oxide (3r)

Prepared according to the general procedure and the products were formed in 4:1 regioisomeric ratio in 78% combined yield and the major product could be isolated as light yellow solid in 51% yield (29 mg) in pure form which was fully characterized, mp 117-121 °C

**<sup>1</sup>H NMR (300 MHz, CDCl<sub>3</sub>+ CD<sub>3</sub>OD)** 8.18 (d, *J* = 7.1 Hz, 1H), 7.92 (d, *J* = 9.1 Hz, 1H), 7.78 (s, 1H), 7.60 – 7.50 (m, 2H), 7.42 (dd, *J* = 9.1, 6.9 Hz, 1H), 7.35 – 7.27 (m, 2H), 7.00 (t, *J* = 6.9 Hz, 1H) ppm.

**<sup>13</sup>C NMR (75 MHz, CDCl<sub>3</sub>)** δ 163.61 (d, *J* = 251.7 Hz), 134.57, 131.06 (d, *J* = 8.6 Hz), 127.06, 123.22, 122.27, 121.68 (d, *J* = 3.5 Hz), 120.53, 117.04 (d, *J* = 22.1 Hz), 115.32, 112.34 ppm.

**FT-IR:**  $\tilde{\nu}$  = 3037, 1719, 1495, 1413, 1335, 1225, 1088 cm<sup>-1</sup>.

**HRMS:** calc. for [M+H]<sup>+</sup> C<sub>13</sub>H<sub>10</sub>N<sub>2</sub>OF: 229.07717 found: 229.07791.

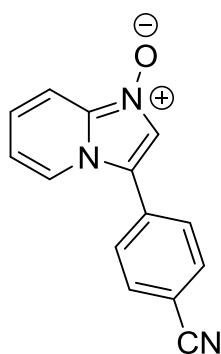

### 3-(4-Bromo)imidazo[1,2-*a*]pyridine 1-oxide (3s)

Prepared according to the general procedure using 2 equiv of alkyne and the products were formed in 3:1 regioisomeric ratio in 65% combined yield and the major product could be isolated as light yellow semi-solid in 43% yield (25 mg) in pure form which was fully characterized;

**<sup>1</sup>H NMR (500 MHz, DMSO)**  $\delta$  8.49 (d,  $J$  = 7.0 Hz, 1H), 8.18 (s, 1H), 7.76 (d,  $J$  = 8.4 Hz, 2H), 7.74 (d,  $J$  = 9.4 Hz, 1H), 7.64 (d,  $J$  = 8.4 Hz, 2H), 7.34 (dd,  $J$  = 9.1, 6.7 Hz, 1H), 7.00 ppm(t,  $J$  = 6.8 Hz, 1H).

**<sup>13</sup>C NMR (126 MHz, DMSO)**  $\delta$  133.90, 132.24, 130.26, 125.64, 125.30, 124.25, 122.81, 122.24, 118.79, 114.76, 111.87 ppm.

**FT-IR:**  $\tilde{\nu}$  = 3090, 2935, 2229, 1684, 1495, 1395, 1173, 1123 cm<sup>-1</sup>.

**HRMS:** calc. for [M+H]<sup>+</sup> C<sub>14</sub>H<sub>10</sub>N<sub>3</sub>O: 236.08184 found: 236.08252.

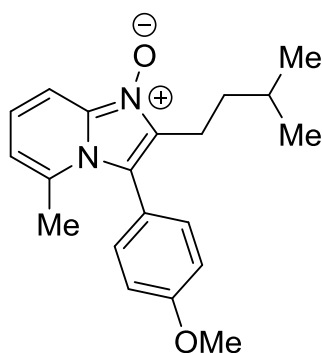

**2-Isopentyl-3-(4-methoxyphenyl)-5-methylimidazo[1,2-a]pyridine 1-oxide (3t)**

Prepared according to the general procedure and the product was obtained as light yellow solid in 83% yield (67 mg), mp 66-68 °C;

**<sup>1</sup>H NMR (300 MHz, CDCl<sub>3</sub>)**  $\delta$  7.74 (d,  $J$  = 9.1 Hz, 1H), 7.33 – 7.22 (m, 2H), 7.07 (dd,  $J$  = 9.1, 6.8 Hz, 1H), 6.98 – 6.81 (m, 2H), 6.45 (d,  $J$  = 6.8 Hz, 1H), 3.85 (s, 3H), 2.69 – 2.56 (m, 2H), 2.03 (s, 3H), 1.51-1.46 (m, 3H), 0.76 (s, 3H), 0.74 (s, 3H).

**<sup>13</sup>C NMR (75 MHz, CDCl<sub>3</sub>)**  $\delta$  160.71, 136.74, 136.33, 134.91, 133.73, 124.63, 121.26, 117.80, 114.96, 113.40, 110.08, 55.47, 36.91, 27.86, 22.30, 21.43, 20.61 ppm.

**FT-IR:**  $\tilde{\nu}$  = 3056, 2949, 2866, 1638, 1580, 1505, 1310, 1247, 1142, 1033 cm<sup>-1</sup>.

**HRMS:** calc. for [M+H]<sup>+</sup> C<sub>20</sub>H<sub>25</sub>N<sub>2</sub>O<sub>2</sub>: 325.19105 found: 325.19229.

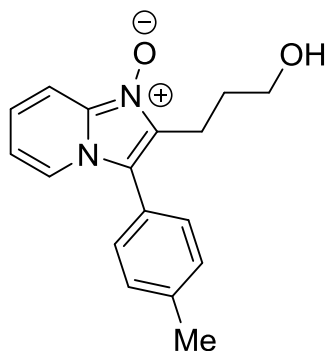

**2-(3-Hydroxypropyl)-3-(p-tolyl)imidazo[1,2-a]pyridine 1-oxide (3u)**

Prepared according to the general procedure and the product was obtained as light yellow solid in 53% yield (38 mg), mp 142-145 °C;

**<sup>1</sup>H NMR (400 MHz, CDCl<sub>3</sub>)** δ 7.95 (d, *J* = 7.0 Hz, 1H), 7.89 (d, *J* = 9.2 Hz, 1H), 7.37 (d, *J* = 8.0 Hz, 2H), 7.33 (d, *J* = 8.0 Hz, 2H), 7.31 – 7.26 (m, 1H), 6.83 (t, *J* = 7 Hz, 1H), 3.69 – 3.57 (m, 2H), 3.11 – 2.96 (m, 2H), 2.46 (s, 3H), 1.95 – 1.77 ppm (m, 2H).

**<sup>13</sup>C NMR (101 MHz, CDCl<sub>3</sub>)** δ 140.34, 135.15, 133.56, 130.52, 129.94, 125.74, 123.07, 122.98, 118.06, 114.43, 112.23, 60.80, 32.91, 21.58, 19.17 ppm.

**FT-IR:**  $\tilde{\nu}$  = 2920, 1738, 1543, 1391, 1108, 1056, 1011 cm<sup>-1</sup>.

**HRMS:** calc. for [M+H]<sup>+</sup> C<sub>17</sub>H<sub>19</sub>N<sub>2</sub>O<sub>2</sub>: 383.14410 found: 283.14481.

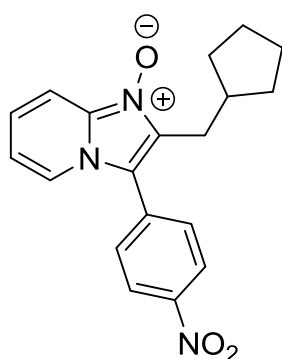

### 2-(Cyclopentylmethyl)-3-(4-nitrophenyl)imidazo[1,2-*a*]pyridine 1-oxide (3v)

Prepared according to the general procedure and the product was obtained as light yellow solid in 82% yield (69 mg), mp 99-102 °C;

**<sup>1</sup>H NMR (500 MHz, CDCl<sub>3</sub>)** δ 8.42 (d, *J* = 8.8 Hz, 2H), 7.98 (d, *J* = 7.0 Hz, 1H), 7.92 (dd, *J* = 9.2, 0.9 Hz, 1H), 7.70 (d, *J* = 8.8 Hz, 2H), 7.32 – 7.26 (m, 1H), 6.89 (td, *J* = 7, 1.1 Hz, 1H), 2.96 (d, *J* = 7.5 Hz, 2H), 2.49 – 2.40 (m, 1H), 1.66-1.59 (m, 2H), 1.50 (ddd, *J* = 7.9, 6.7, 5.1 Hz, 2H), 1.46 – 1.40 (m, 2H), 1.11 – 0.99 ppm (m, 2H).

**<sup>13</sup>C NMR (126 MHz, CDCl<sub>3</sub>)** δ 148.09, 136.52, 134.41, 133.56, 130.83, 125.70, 124.94, 122.37, 115.12, 115.00, 112.74, 38.42, 32.54, 28.23, 24.71 ppm.

**FT-IR:**  $\tilde{\nu}$  = 3105, 2949, 2866, 1732, 1599, 1515, 1344, 1107 cm<sup>-1</sup>.

**HRMS:** calc. for [M+H]<sup>+</sup> C<sub>19</sub>H<sub>20</sub>N<sub>3</sub>O<sub>3</sub>: 338.14992 found: 338.15093.



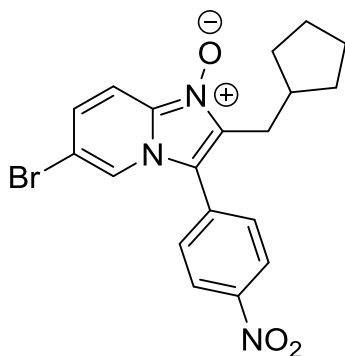

### 6-Bromo-2-(cyclopentylmethyl)-3-(4-nitrophenyl)imidazo[1,2-a]pyridine 1-oxide (3w)

Prepared according to the general procedure and the product was obtained as light yellow solid in 76% yield (79 mg), mp 104-110 °C;

**<sup>1</sup>H NMR (500 MHz, CDCl<sub>3</sub>)** δ 8.42 (d, *J* = 8.8 Hz, 2H), 8.01 (s, 1H), 7.81 (d, *J* = 9.6 Hz, 1H), 7.67 (d, *J* = 8.8 Hz, 2H), 7.28 – 7.24 (m, 1H), 2.90 (d, *J* = 7.5 Hz, 2H), 2.39 (dt, *J* = 15.5, 7.8 Hz, 1H), 1.60 (dt, *J* = 11.3, 6.5 Hz, 2H), 1.54 – 1.45 (m, 2H), 1.41 (m, 2H), 1.01 ppm (m, 2H).

**<sup>13</sup>C NMR (126 MHz, CDCl<sub>3</sub>)** δ 148.37, 137.07, 132.88, 131.89, 130.91, 128.59, 125.10, 122.11, 115.41, 113.44, 109.83, 38.29, 32.52, 28.23, 24.70 ppm.

**FT-IR:**  $\tilde{\nu}$  = 3093, 2951, 2862, 1611, 1515, 1382, 1345, 1206, 1055 cm<sup>-1</sup>.

**HRMS:** [M+H]<sup>+</sup> C<sub>19</sub>H<sub>19</sub><sup>79</sup>BrN<sub>3</sub>O<sub>3</sub>: 416.06043 found: 416.06132. HRMS: calc. for [M+H]<sup>+</sup> C<sub>19</sub>H<sub>19</sub><sup>81</sup>BrN<sub>3</sub>O<sub>3</sub>: 418.05838 found: 418.05834.

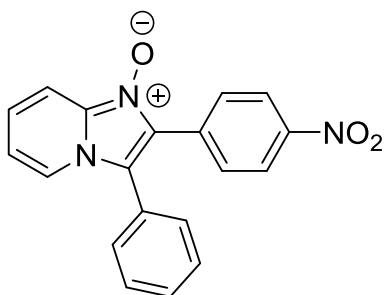

### 2-(4-Nitrophenyl)-3-phenylimidazo[1,2-a]pyridine 1-oxide (3x)

Prepared according to the general procedure and the product was obtained as light yellow solid in 84% yield (70 mg), mp 85-90 °C;

**<sup>1</sup>H NMR (300 MHz, CDCl<sub>3</sub>)** δ 8.28 (d, *J* = 8.8 Hz, 2H), 8.10 (d, *J* = 7.0 Hz, 1H), 7.98 (d, *J* = 9.2 Hz, 1H), 7.61 (dd, *J* = 6.6, 3.2 Hz, 2H), 7.56 (d, *J* = 8.8 Hz, 2H), 7.34 (dd, *J* = 5.3, 1.9 Hz, 3H), 7.31 – 7.26 (m, 1H), 6.91 ppm (dd, *J* = 6.6, 1.9 Hz, 1H).

**$^{13}\text{C}$  NMR (75 MHz,  $\text{CDCl}_3$ )**  $\delta$  147.87, 134.85, 134.21, 133.40, 131.09, 130.31, 129.69, 128.66, 125.97, 125.63, 124.85, 122.34, 115.52, 114.86, 113.31, ppm.

**FT-IR:**  $\tilde{\nu}$  = 3025, 2929, 1597, 1514, 1443, 1383, 1345, 1104  $\text{cm}^{-1}$ .

**HRMS:** calc. for  $[\text{M}+\text{H}]^+$   $\text{C}_{19}\text{H}_{14}\text{N}_3\text{O}_3$ : 332.10297 found: 332.10432.

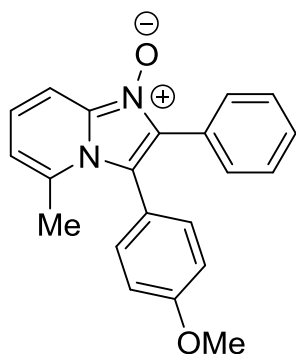

**3-(4-Methoxyphenyl)-5-methyl-2-phenylimidazo[1,2-a]pyridine 1-oxide (3y)**

Prepared according to the general procedure and the product was obtained as light yellow solid in 85% yield (70 mg), mp 173-177  $^{\circ}\text{C}$ ;

**$^1\text{H}$  NMR (300 MHz,  $\text{CDCl}_3$ )**  $\delta$  7.85 (d,  $J$  = 9.1 Hz, 1H), 7.62 – 7.55 (m, 2H), 7.27 (d,  $J$  = 8.7 Hz, 2H), 7.22 (m, 3H), 7.11 (dd,  $J$  = 9.1, 6.8 Hz, 1H), 6.85 (d,  $J$  = 8.7 Hz, 2H), 6.49 (d,  $J$  = 6.8 Hz, 1H), 3.79 (s, 3H), 2.05 ppm (s, 3H).

**$^{13}\text{C}$  NMR (75 MHz,  $\text{CDCl}_3$ )**  $\delta$  160.65, 136.57, 135.25, 133.78, 130.14, 128.64, 127.96, 126.64, 125.10, 121.16, 118.38, 115.65, 113.45, 110.75, 55.36, 21.54 ppm.

**FT-IR:**  $\tilde{\nu}$  = 2987, 2963, 1631, 1605, 1542, 1391, 1290, 1246, 1161, 1027  $\text{cm}^{-1}$ .

**HRMS:** calc. for  $[\text{M}+\text{H}]^+$   $\text{C}_{21}\text{H}_{19}\text{N}_2\text{O}_2$ : 331.14410 found: 331.14496.

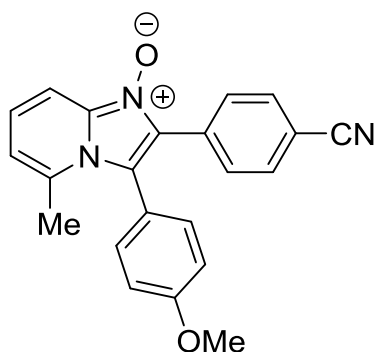

**2-(4-Cyanophenyl)-3-(4-methoxyphenyl)-5-methylimidazo[1,2-a]pyridine 1-oxide (3z)**

Prepared according to the general procedure and the product was obtained as light yellow solid in 85% yield (76 mg), mp 98-102  $^{\circ}\text{C}$ ;

**<sup>1</sup>H NMR (300 MHz, CDCl<sub>3</sub>)** δ 7.86 (d, *J* = 9.1 Hz, 1H), 7.79 (d, *J* = 8.6 Hz, 2H), 7.52 (d, *J* = 8.6 Hz, 2H), 7.30 (d, *J* = 8.7 Hz, 2H), 7.16 (dd, *J* = 9.1, 6.8 Hz, 1H), 6.91 (d, *J* = 8.7 Hz, 2H), 6.55 (d, *J* = 6.8 Hz, 1H), 3.84 (s, 3H), 2.08 ppm (s, 3H).

**<sup>13</sup>C NMR (75 MHz, CDCl<sub>3</sub>)** δ 161.16, 136.96, 135.80, 134.16, 131.79, 131.48, 130.52, 126.12, 124.69, 120.35, 119.30, 118.68, 116.33, 113.94, 112.15, 110.91, 55.51, 21.58 ppm.

**FT-IR:**  $\tilde{\nu}$  = 3006, 2967, 2839, 1912, 1609, 1546, 1333, 1291, 1253, 1180, 1071 cm<sup>-1</sup>.

**HRMS:** calc. for [M+H]<sup>+</sup> C<sub>22</sub>H<sub>18</sub>N<sub>3</sub>O<sub>2</sub>: 356.13935 found: 356.14013.

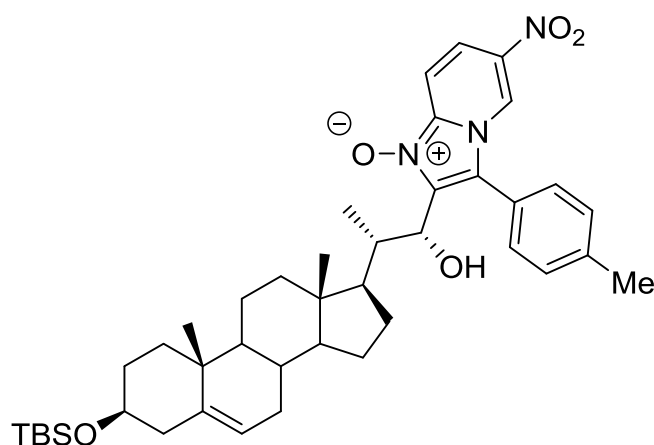

**2-((1*R*,2*S*)-2-((8*S*,9*S*,10*R*,13*S*,14*S*,17*R*)-3-((tert-butyldimethylsilyl)oxy)-10,13-dimethyl-2,3,4,7,8,9,10,11,12,13,14,15,16,17-tetradecahydro-1*H*-cyclopenta[*a*]phenanthren-17-yl)-1-hydroxypropyl)-6-nitro-3-(*p*-tolyl)imidazo[1,2-*a*]pyridine 1-oxide (3aa)**

Prepared according to the general procedure using 2 equiv of nitroso compound with 1 equiv of alkyne (0.1 mmol scale) and the product was obtained as light yellow solid in 85% yield (61 mg), mp 228-231 °C;

**<sup>1</sup>H NMR (600 MHz, CDCl<sub>3</sub>)** δ 8.85 (d, *J* = 1.0 Hz, 1H), 7.93 (s, 2H), 7.43 (d, *J* = 8.0 Hz, 2H), 7.38 (d, *J* = 8.0 Hz, 2H), 5.29 (dd, *J* = 2.9, 2.1 Hz, 1H), 4.90 (d, *J* = 4.9 Hz, 1H), 3.47 – 3.42 (m, 1H), 2.49 (s, 3H), 2.23 (dd, *J* = 17.8, 6.7 Hz, 1H), 2.17 – 2.10 (m, 2H), 1.91 (dt, *J* = 24.0, 8.6 Hz, 2H), 1.78 – 1.73 (m, 1H), 1.68 (d, *J* = 12.4 Hz, 1H), 1.54 – 1.47 (m, 1H), 1.41 (ddd, *J* = 14.5, 12.7, 6.9 Hz, 3H), 1.38 – 1.31 (m, 2H), 1.26 – 1.18 (m, 2H), 1.10 – 1.04 (m, 1H), 0.98 (dd, *J* = 11.6, 5.4 Hz, 5H), 0.94 (s, 3H), 0.87 (s, 8H), 0.69 (dd, *J* = 11.3, 4.1 Hz, 1H), 0.63 (s, 3H), 0.04 ppm (s, 6H).

**<sup>13</sup>C NMR (50 MHz, CDCl<sub>3</sub>)** δ 141.89, 141.77, 138.92, 136.43, 133.01, 130.96, 130.79, 123.91, 121.17, 121.04, 120.58, 118.82, 112.24, 72.73, 72.06, 56.72, 53.26, 50.31, 45.56, 43.08, 42.89, 39.85, 37.48, 36.61, 32.15, 31.97, 31.83, 28.23, 26.04, 24.61, 21.67, 21.06, 19.49, 18.37, 15.10, 11.66, -4.48 ppm.

**FT-IR:**  $\tilde{\nu}$  = 2928, 2855, 1525, 1509, 1515, 1460, 1332, 1249, 1195, 1078  $\text{cm}^{-1}$ .

**HRMS:** calc. for  $[\text{M}+\text{H}]^+$   $\text{C}_{42}\text{H}_{60}\text{N}_2\text{O}_5\text{Si}$ : 714.42967 found: 714.43019.

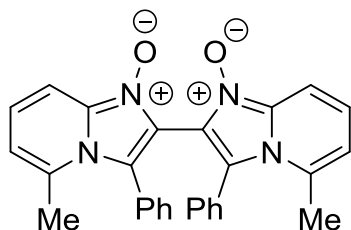

**5,5'-Dimethyl-3,3'-diphenyl-[2,2'-biimidazo[1,2-a]pyridine] 1,1'-dioxide (3ab)**

Prepared according to the general procedure using 1 equiv alkyne, 2 equiv 6-methyl-2-nitrosopyridine and the products were formed in 73% combined yield and the major product could be isolated as light yellow solid in 65 % yield (72.00 mg), mp 72-76 °C;

**$^1\text{H}$  NMR (300 MHz,  $\text{CDCl}_3$ )**  $\delta$  8.02 (d,  $J$  = 9.0 Hz, 2H), 7.58 – 7.49 (m, 4H), 7.33 – 7.23 (m, 8H), 6.74 (d,  $J$  = 6.9 Hz, 2H), 2.09 ppm (s, 6H).

**$^{13}\text{C}$  NMR (75 MHz,  $\text{CDCl}_3$ )**  $\delta$  138.69, 137.33, 135.68, 130.11, 128.98, 128.78, 126.99, 125.58, 117.79, 111.77, 104.13, 18.90 ppm.

**FT-IR:**  $\tilde{\nu}$  = 3063, 2926, 2915, 1634, 1546, 1444, 1406, 1209, 1114  $\text{cm}^{-1}$ .

**HRMS:** calc. for  $[\text{M}+\text{H}]^+$   $\text{C}_{28}\text{H}_{23}\text{N}_4\text{O}_2$ : 447.18155 found: 447.18190.

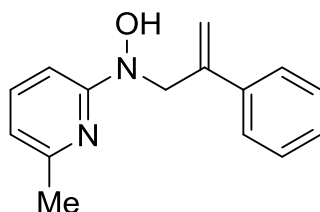

**N-(6-methylpyridin-2-yl)-N-(2-phenylallyl)hydroxylamine (4a)**

To a screw cap reaction vial 6-methyl-2-nitrosopyridine (0.25 mmol, 1 equiv),  $\alpha$ -methylstyrene (0.5 mmol, 2 equiv), and 1,1,1,3,3,3-hexafluoro-2-propanol (HFIP, 1.0 mL) were added under air. The reaction mixture was stirred vigorously at RT for 3 h. The crude reaction mixture was concentrated under reduced pressure and subsequently purified by flash column chromatography over silica gel using ethylacetate/petroleum ether as an eluent system. The product was obtained as light yellow liquid in 93% yield (53 mg);

**$^1\text{H}$  NMR (300 MHz,  $\text{CDCl}_3$ )**  $\delta$  7.55 (d,  $J$  = 7.2 Hz, 2H), 7.43 (t,  $J$  = 7.8 Hz, 1H), 7.34-7.26 (m, 3H), 6.82 (d,  $J$  = 8.3 Hz, 1H), 6.63 (d,  $J$  = 7.2 Hz, 1H), 5.55 (s, 1H), 5.37 (s, 1H), 4.67 (s, 2H), 2.45 ppm (s, 3H).

**$^{13}\text{C}$  NMR (75 MHz,  $\text{CDCl}_3$ )**  $\delta$  161.52, 155.98, 143.65, 139.38, 138.13, 128.41, 127.84, 126.45, 115.45, 115.40, 106.18, 59.12, 24.25 ppm.

**FT-IR:**  $\tilde{\nu}$  = 3058, 2925, 2854, 1632, 1589, 1449, 1333, 1263, 1195, 1029  $\text{cm}^{-1}$ .

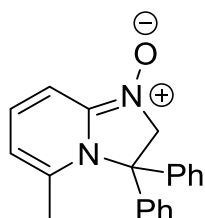

**5-Methyl-3,3-diphenyl-2,3-dihydroimidazo[1,2-a]pyridine 1-oxide (4b)**

To a screw cap reaction vial 6-methyl-2-nitrosopyridine (0.25 mmol, 1 equiv), alpha-phenylstyrene (0.5 mmol, 2 equiv), and 1,1,1,3,3,3-hexafluoro-2-propanol (HFIP, 1.0 mL) were added under air. The reaction mixture was stirred vigorously at RT for 12 h. The crude reaction mixture was concentrated under reduced pressure and subsequently purified by flash column chromatography over silica gel using dichloromethane/methanol as an eluent system. The product was obtained as light yellow solid in 85% yield (61 mg), mp 133-136  $^{\circ}\text{C}$ ;

**$^1\text{H}$  NMR (500 MHz,  $\text{CDCl}_3$ )**  $\delta$  7.41 – 7.36 (m, 6H), 7.27 – 7.23 (m, 4H), 6.61 (d,  $J$  = 6.4 Hz, 2H), 5.77 – 5.69 (m, 1H), 4.65 (s, 2H), 2.14 ppm (s, 3H).

**$^{13}\text{C}$  NMR (126 MHz,  $\text{CDCl}_3$ )**  $\delta$  151.39, 147.04, 140.63, 132.52, 129.25, 129.14, 127.53, 109.00, 107.75, 73.45, 70.00, 21.97 ppm.

**FT-IR:**  $\tilde{\nu}$  = 3059, 2955, 1655, 1538, 1493, 1446, 1356, 1130, 1081  $\text{cm}^{-1}$ .

**HRMS:** calc. for  $[\text{M}+\text{H}]^+$   $\text{C}_{19}\text{H}_{17}\text{N}_2\text{O}$ : 289.13354 found: 289.13333.

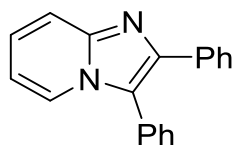

**2,3-Diphenylimidazo[1,2-a]pyridine (5a)**

To a screw cap reaction vial 2,3-diphenylimidazo[1,2-a]pyridine 1-oxide (**2a**, 0.25 mmol) and acetonitrile (2.0 mL) were added under air. The reaction mixture was stirred vigorously at 125-130  $^{\circ}\text{C}$  for 3 h. After completion the crude reaction mixture was concentrated under reduced pressure and subsequently purified by flash column chromatography over silica gel using dichloromethane/methanol as an eluent system. The product was obtained as brown solid in 95% yield (64 mg), mp 138-141  $^{\circ}\text{C}$ ;

**<sup>1</sup>H NMR (500 MHz, CDCl<sub>3</sub>)** δ 7.89 (dd, *J* = 6.8, 1.0 Hz, 1H), 7.68 (d, *J* = 9.1 Hz, 1H), 7.62–7.57 (m, 2H), 7.50 – 7.44 (m, 2H), 7.44 – 7.42 (m, 1H), 7.41 – 7.37 (m, 2H), 7.24 – 7.19 (m, 3H), 7.18 – 7.14 (m, 1H), 6.70 ppm (dd, *J* = 6.8, 1.0 Hz, 1H);

**<sup>13</sup>C NMR (126 MHz, CDCl<sub>3</sub>)** δ 144.60, 133.73, 130.90, 129.75, 129.19, 128.47, 128.26, 127.82, 125.32, 123.49, 121.24, 117.50, 112.76 ppm.

**FT-IR:**  $\tilde{\nu}$  = 3058, 2925, 1666, 1600, 1505, 1442, 1344, 1212, 1027 cm<sup>-1</sup>.

**HRMS:** calc. for [M+H]<sup>+</sup> C<sub>19</sub>H<sub>15</sub>N<sub>2</sub>: 271.12298 found: 271.12367.

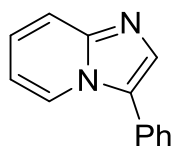

### 3-Phenylimidazo[1,2-*a*]pyridine (5b)

To a screw cap sealed reaction tube 3-phenylimidazo[1,2-*a*]pyridine 1-oxide (**3q**, 0.25 mmol) and acetonitrile (2.0 mL) were added under air. The reaction mixture was stirred vigorously at 140 °C for 12 h. After completion the crude reaction mixture was concentrated under reduced pressure and subsequently purified by flash column chromatography over silica gel using dichloromethane/methanol as an eluent system. The product was obtained as brown oil in 86% yield (42 mg);

**<sup>1</sup>H NMR (500 MHz, CDCl<sub>3</sub>)** δ 8.38 – 8.31 (m, 1H), 7.72–7.70 (m, 2H), 7.58 – 7.54 (m, 2H), 7.54 – 7.50 (m, 2H), 7.45 – 7.40 (m, 1H), 7.23 (s, 1H), 6.83 ppm (dd, *J* = 6.8, 1.0 Hz, 1H); **<sup>13</sup>C NMR (126 MHz, CDCl<sub>3</sub>)** δ 146.01, 132.11, 129.42, 129.26, 128.46, 128.26, 124.72, 123.55, 118.26, 112.89 ppm;

**FT-IR:**  $\tilde{\nu}$  = 3055, 2936, 2851, 1643, 1499, 1353, 1297, 1148, 1010 cm<sup>-1</sup>.

**HRMS:** calc. for [M+H]<sup>+</sup> C<sub>13</sub>H<sub>11</sub>N<sub>2</sub>O: 195.09167 found: 195.0912.

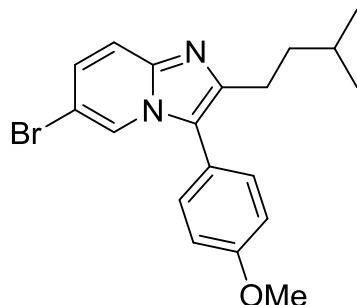

### 6-Bromo-2-isopentyl-3-(4-methoxyphenyl)imidazo[1,2-*a*]pyridine (5c)

To a screw cap sealed reaction tube 6-bromo-2-isopentyl-3-(4-methoxyphenyl)imidazo[1,2-*a*]pyridine 1-oxide (0.15 mmol) and propionitrile (2.0 mL) were added under air. The reaction mixture was stirred vigorously at 150 °C for 12 h. After completion the crude reaction mixture

was concentrated under reduced pressure and subsequently purified by flash column chromatography over silica gel using dichloromethane/methanol as an eluent system. The product was obtained as black amorphous solid in 65% yield (62 mg);

**<sup>1</sup>H NMR (500 MHz, CDCl<sub>3</sub>)** δ 8.08 (d, *J* = 1.0 Hz, 1H), 7.56 (d, *J* = 9.4 Hz, 1H), 7.38 – 7.31 (m, 2H), 7.24 (dd, *J* = 9.4, 1.6 Hz, 1H), 7.11 – 7.06 (m, 2H), 3.90 (s, 3H), 2.78 – 2.69 (m, 2H), 1.69 – 1.61 (m, 2H), 1.56 (td, *J* = 13.2, 6.6 Hz, 1H), 0.87 ppm (d, *J* = 6.5 Hz, 6H);

**<sup>13</sup>C NMR (75 MHz, CDCl<sub>3</sub>)** δ 160.03, 142.10, 131.20, 127.88, 124.56, 123.25, 120.11, 117.28, 114.88, 107.12, 55.38, 38.82, 27.92, 25.34, 22.33;

**FT-IR:**  $\tilde{\nu}$  = 3060, 2966, 1656, 1538, 1493, 1446, 1355, 1278, 1130 cm<sup>-1</sup>.

**HRMS:** calc. for [M+H]<sup>+</sup> C<sub>19</sub>H<sub>22</sub><sup>79</sup>BrN<sub>2</sub>O: 373.09100 found: 373.09266. HRMS: calc. for [M+H]<sup>+</sup> C<sub>19</sub>H<sub>22</sub><sup>81</sup>BrN<sub>2</sub>O: 375.08896 found: 375.08997.

## Reaction Mechanism Studies:

### (1) Radical trapping

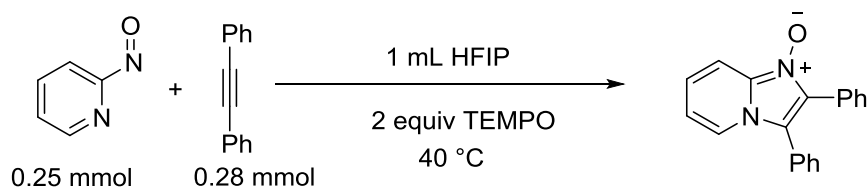

To a screw cap reaction vial 2-nitrosopyridine (0.25 mmol, 1 equiv), diphenylacetylene (0.28 mmol, 1.1 equiv), TEMPO (2 equiv) and 1,1,1,3,3,3-hexafluoro-2-propanol (HFIP) 1.0 mL were added. The reaction mixture was heated to 40 °C for 12 h. The crude reaction mixture was concentrated under reduced pressure and subsequently purified by flash column chromatography over silica gel using dichloromethane/methanol as an eluent system and isolated yield was 40%.

### (2) Competition study

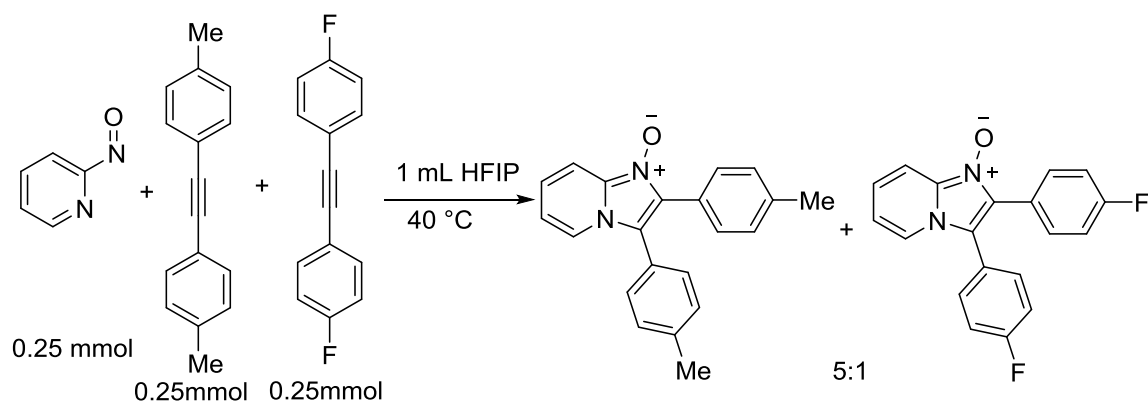

To a screw cap reaction vial, 2-aminosopyridine derivatives (0.25 mmol, 1 equiv), 1,2-di-*p*-tolylethyne (0.24 mmol, 1.0 equiv), 1,2-bis(4-fluorophenyl)ethyne (0.24 mmol, 1.0 equiv), and 1,1,1,3,3,3-hexafluoro-2-propanol (HFIP) 1.0 mL were added. The reaction mixture was heated to 40 °C for 6 h. The crude reaction mixture was concentrated under reduced pressure and subsequently purified by flash column chromatography over silica gel using dichloromethane/methanol as an eluent system. The ratio of the product was checked by <sup>1</sup>H NMR analysis and it was 5:1.



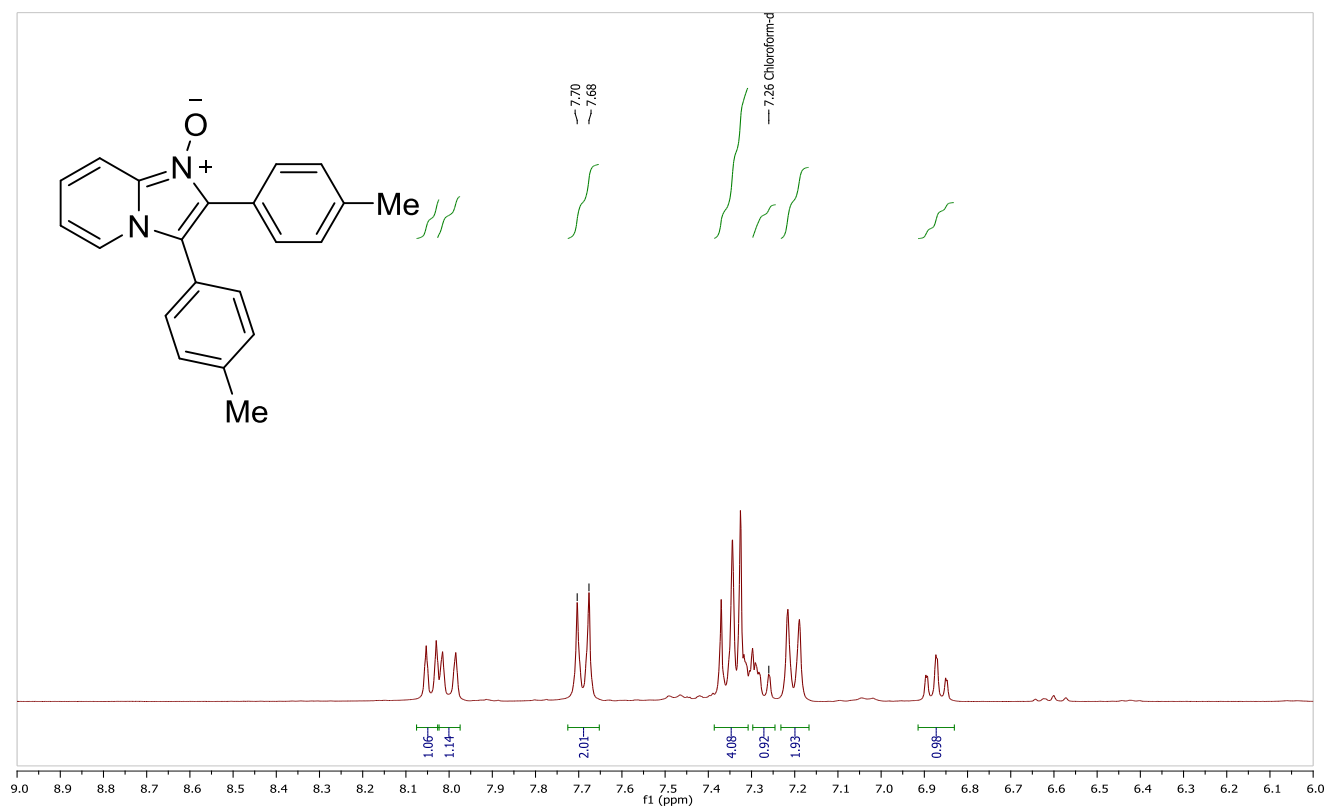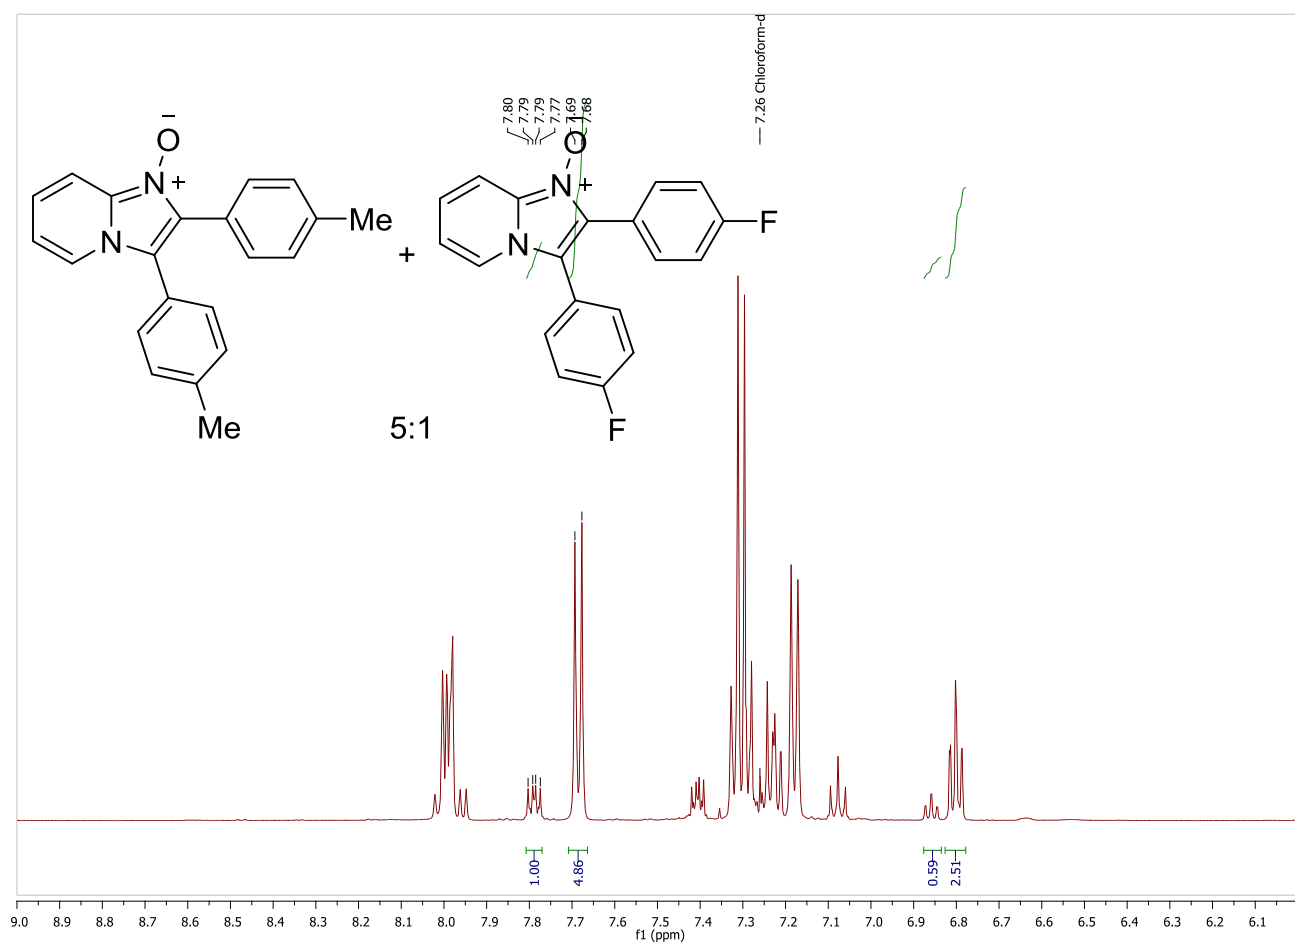

### Crystallographic data for the compound **3h**:

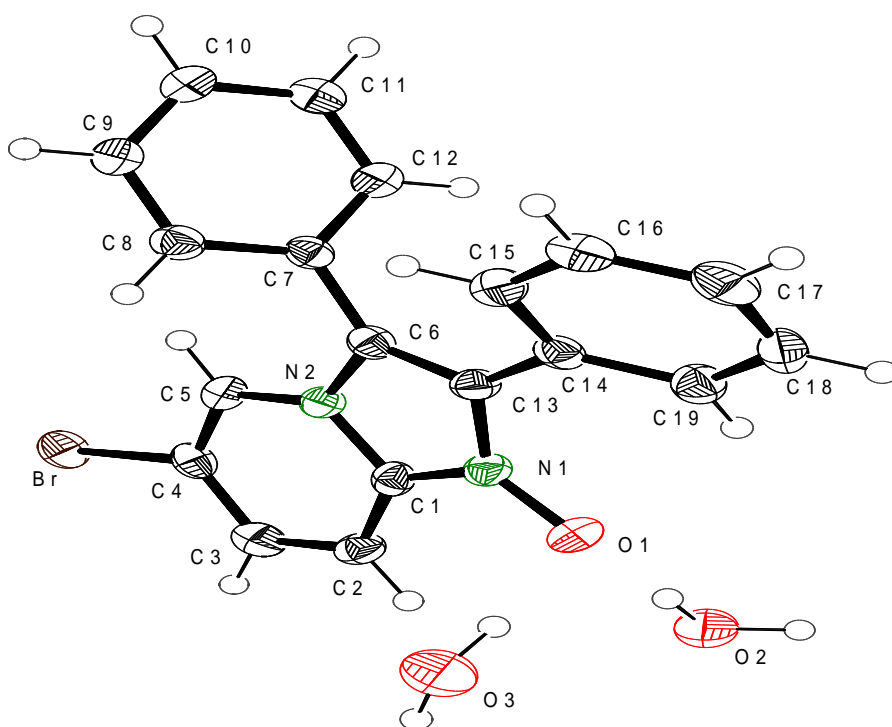

**Crystal structure of the N-oxide product.** ORTEP of (**3h**) Crystallographic data have been deposited at the Cambridge Crystallographic Data Centre and copies can be obtained on request, free of charge, by quoting the publication citation and the deposition number CCDC 1018375.

Table 1. Crystal data and structure refinement for **3g**.

|                      |                                                                  |          |
|----------------------|------------------------------------------------------------------|----------|
| Identification code  | CCDC 1018375                                                     |          |
| Empirical formula    | C <sub>19</sub> H <sub>17</sub> Br N <sub>2</sub> O <sub>3</sub> |          |
| Formula weight       | 401.25                                                           |          |
| Temperature          | 173(2) K                                                         |          |
| Wavelength           | 0.71073 Å                                                        |          |
| Crystal system       | Orthorhombic                                                     |          |
| Space group          | P 21 21 21                                                       |          |
| Unit cell dimensions | a = 5.6130(4) Å                                                  | a = 90°. |
|                      | b = 16.0480(14) Å                                                | b = 90°. |
|                      | c = 18.9931(15) Å                                                | g = 90°. |
| Volume               | 1710.8(2) Å <sup>3</sup>                                         |          |

|                                   |                                             |
|-----------------------------------|---------------------------------------------|
| Z                                 | 4                                           |
| Density (calculated)              | 1.558 Mg/m <sup>3</sup>                     |
| Absorption coefficient            | 2.424 mm <sup>-1</sup>                      |
| F(000)                            | 816                                         |
| Crystal size                      | 0.401 x 0.043 x 0.023 mm <sup>3</sup>       |
| Theta range for data collection   | 2.492 to 25.997°.                           |
| Index ranges                      | -6<=h<=6, -19<=k<=19, -23<=l<=23            |
| Reflections collected             | 54577                                       |
| Independent reflections           | 3355 [R(int) = 0.1113]                      |
| Completeness to theta = 25.242°   | 99.8 %                                      |
| Refinement method                 | Full-matrix least-squares on F <sup>2</sup> |
| Data / restraints / parameters    | 3355 / 4 / 242                              |
| Goodness-of-fit on F <sup>2</sup> | 1.021                                       |
| Final R indices [I>2sigma(I)]     | R1 = 0.0358, wR2 = 0.0688                   |
| R indices (all data)              | R1 = 0.0542, wR2 = 0.0753                   |
| Absolute structure parameter      | -0.026(6)                                   |
| Extinction coefficient            | n/a                                         |
| Largest diff. peak and hole       | 0.336 and -0.235 e.Å <sup>-3</sup>          |

(3a)

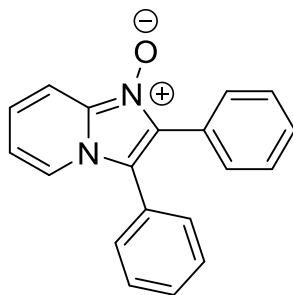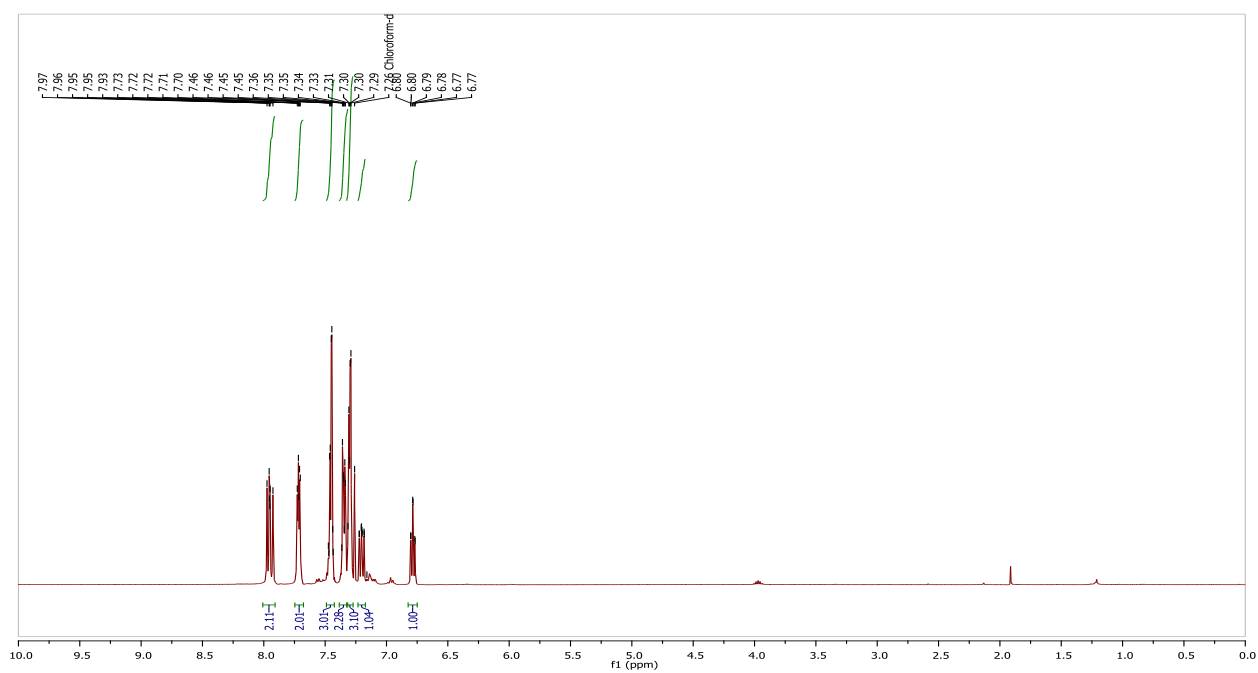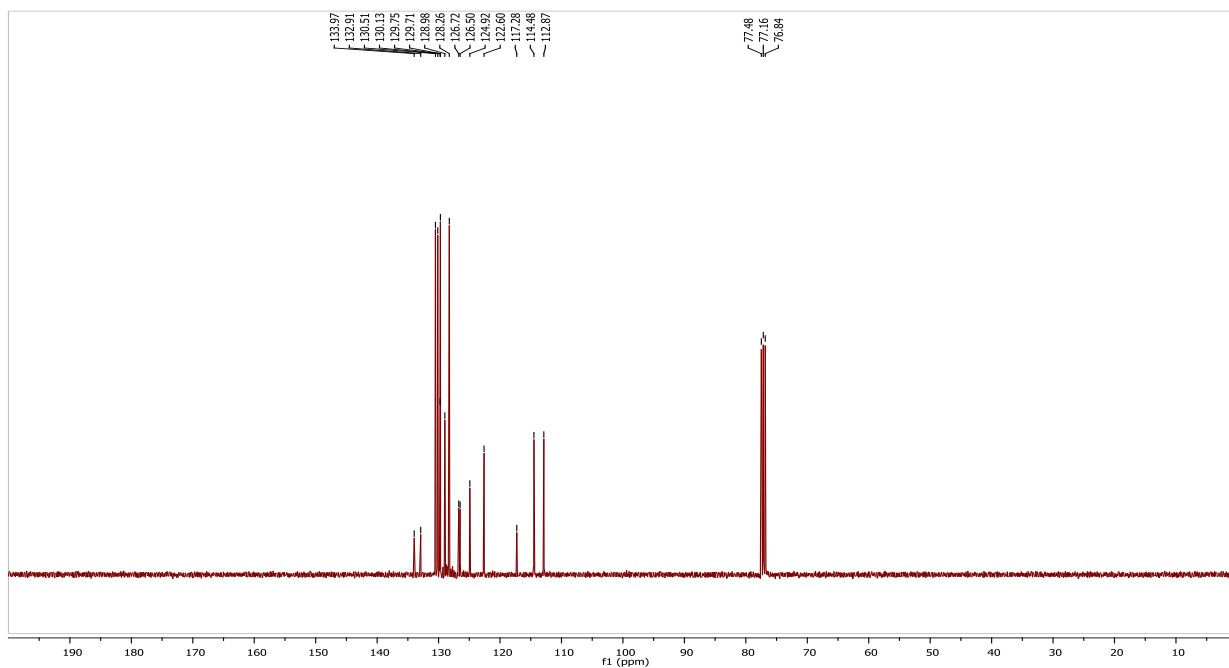

(3b)

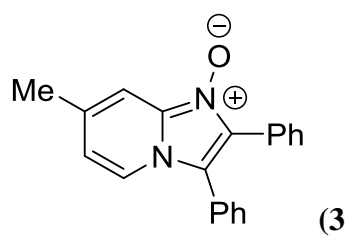

(3)

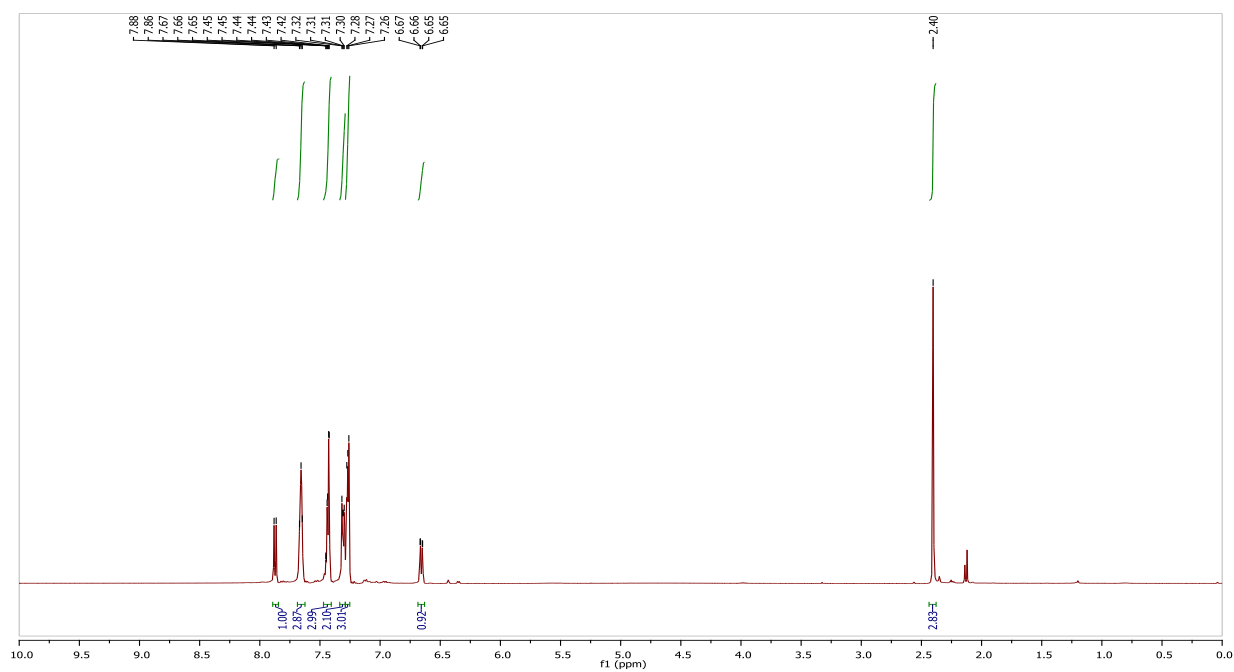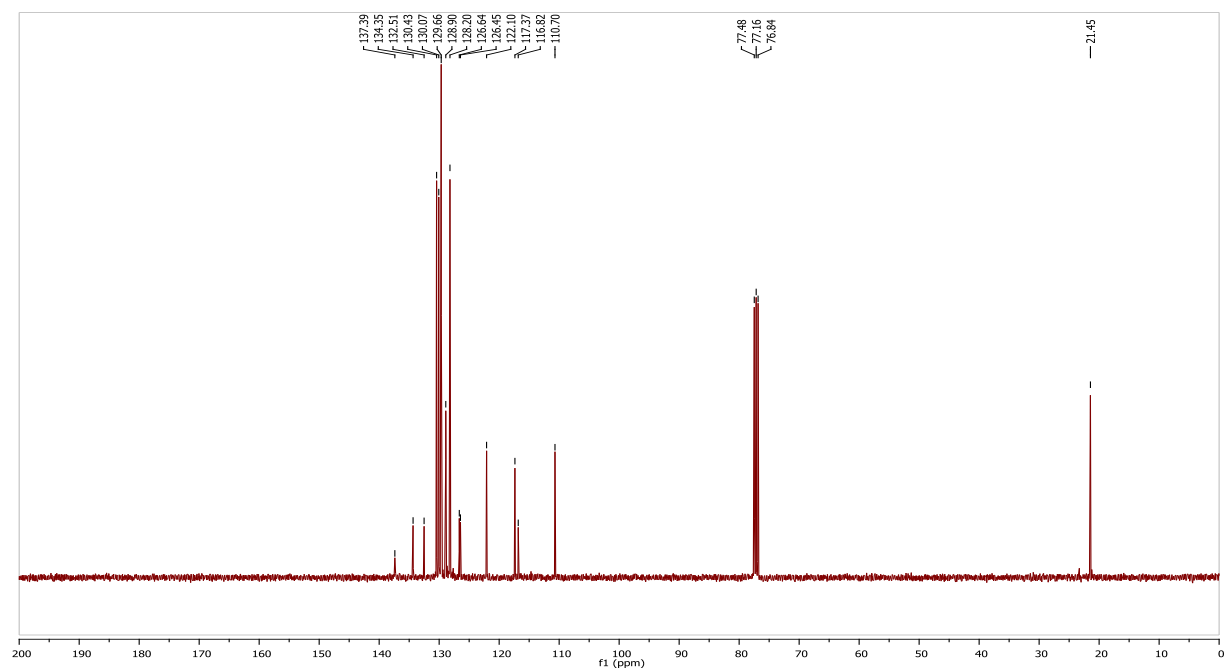

(3c)

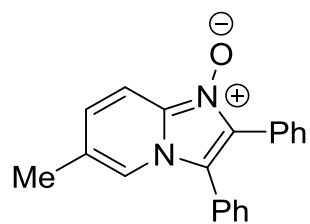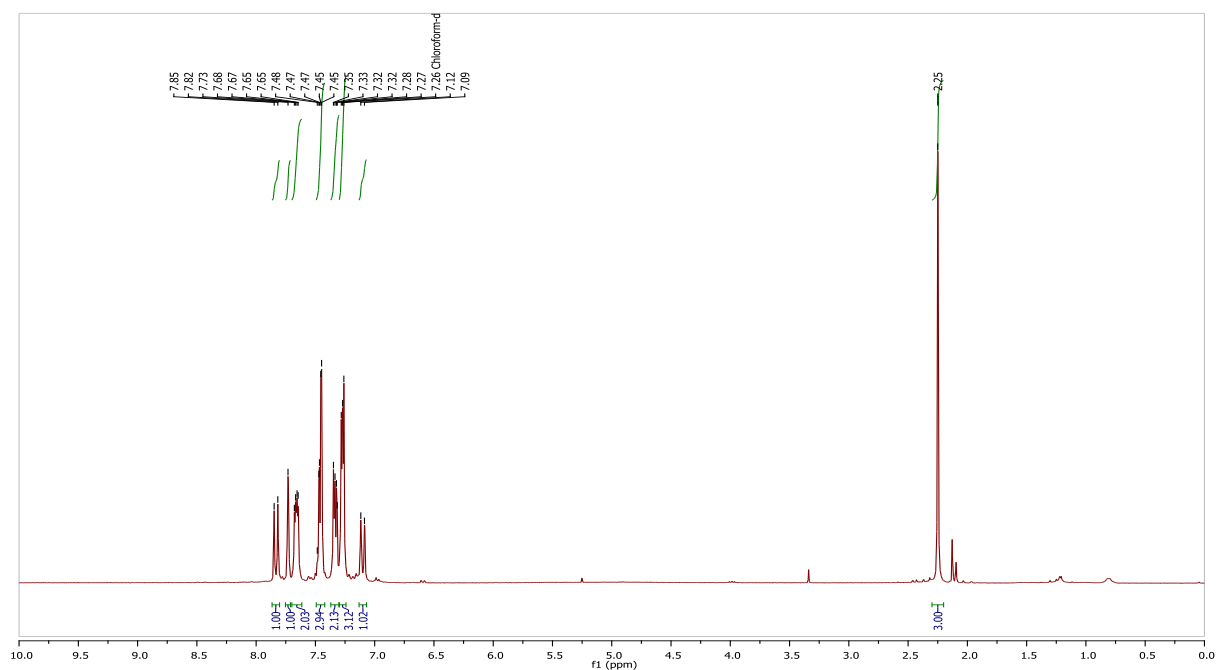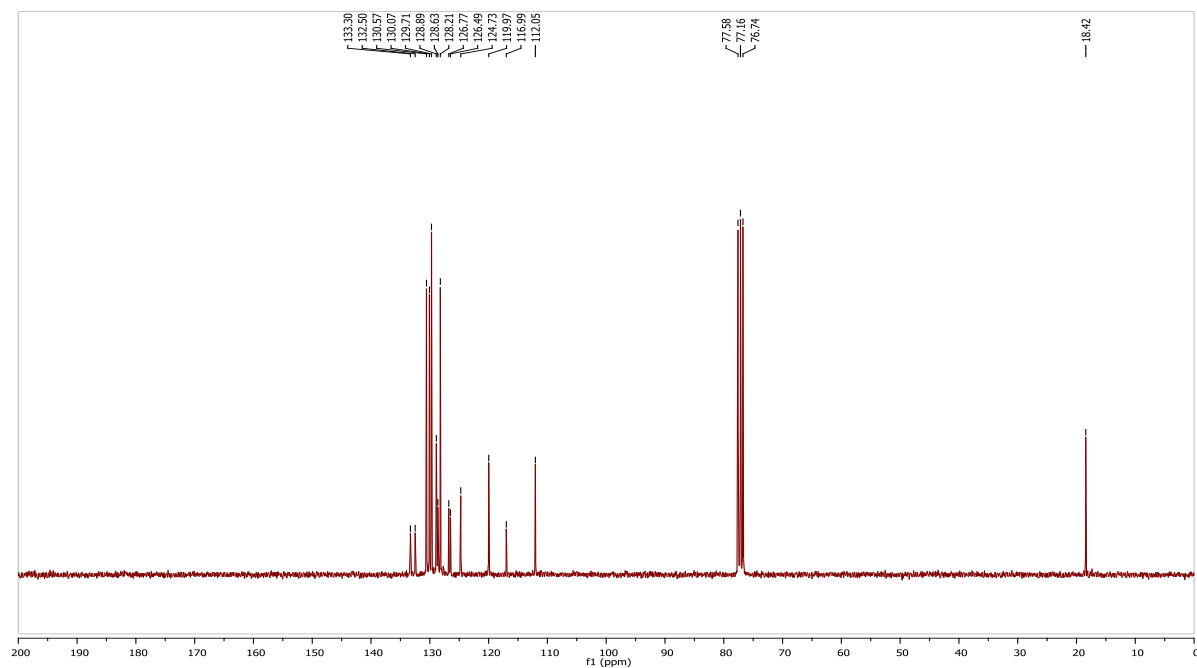

(3d)

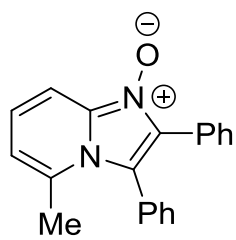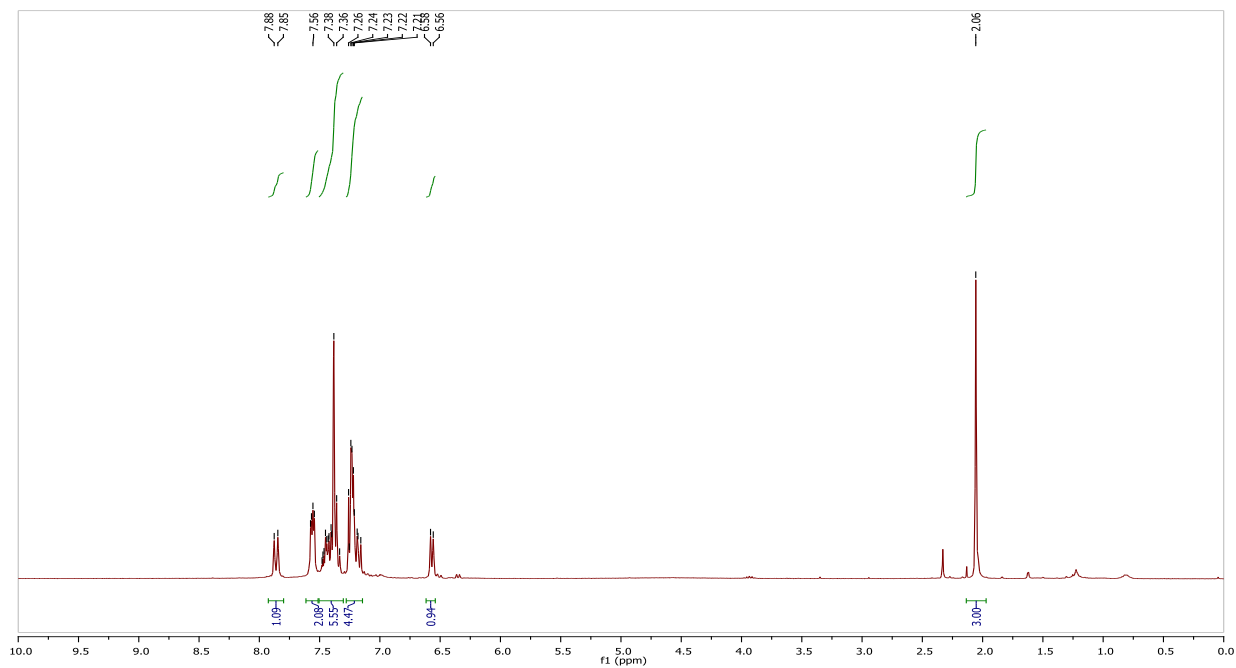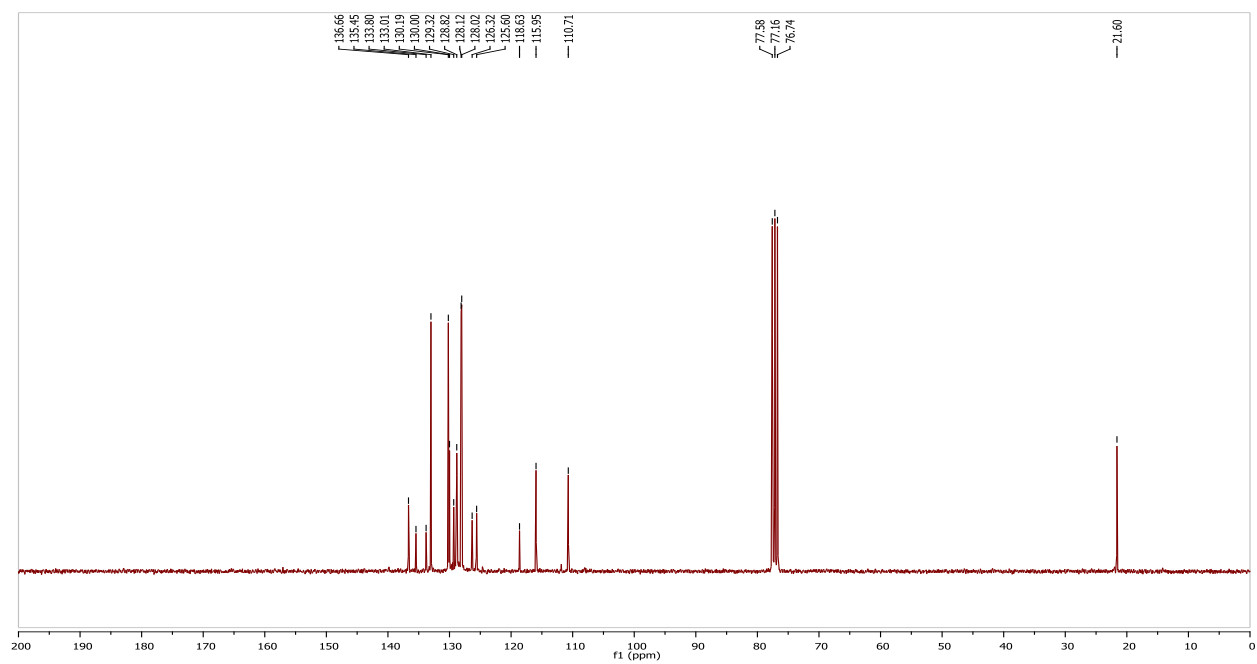

(3e)

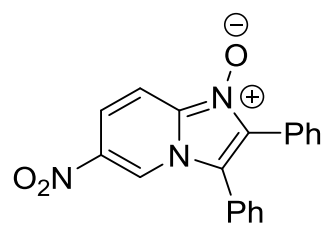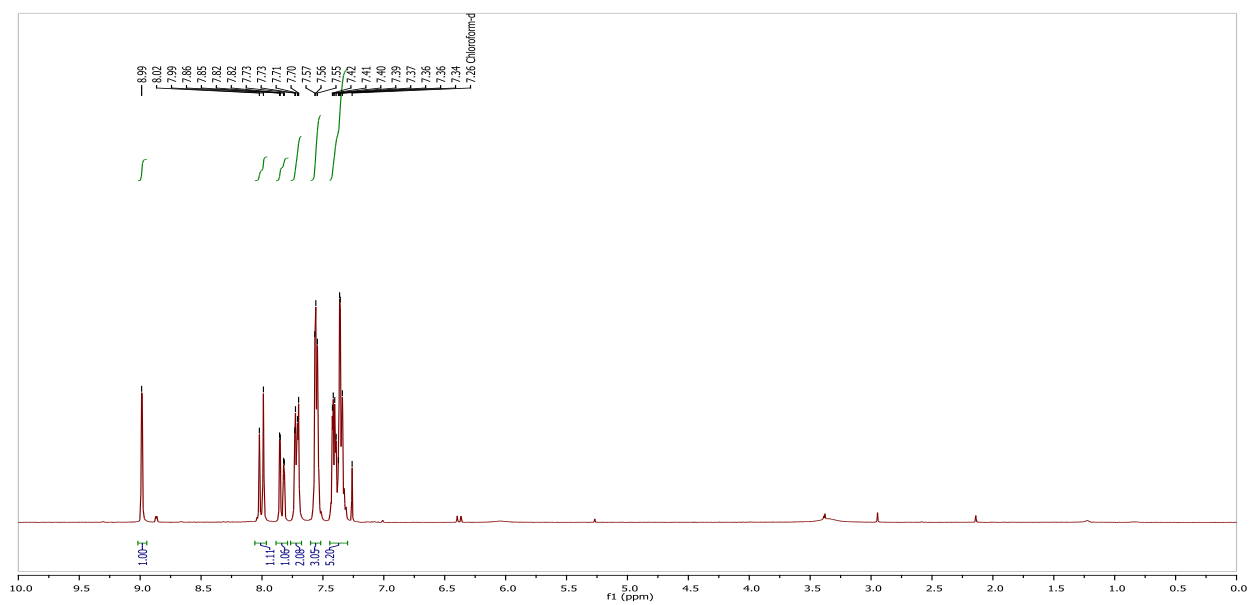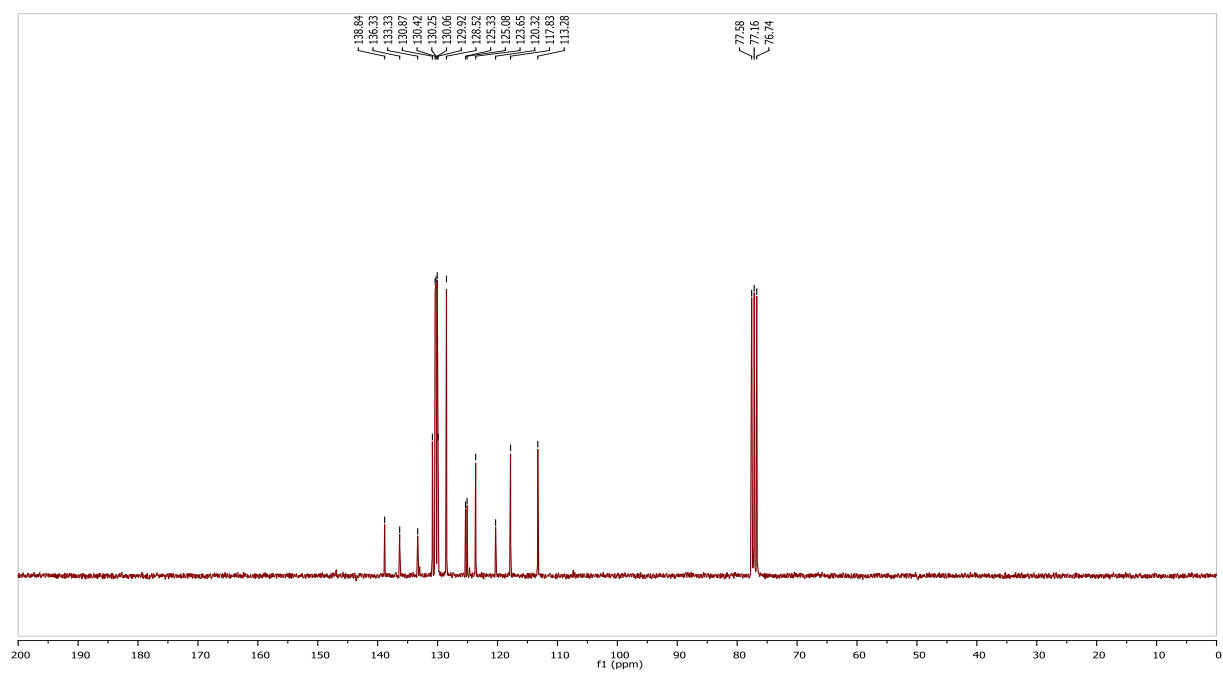



(3f)

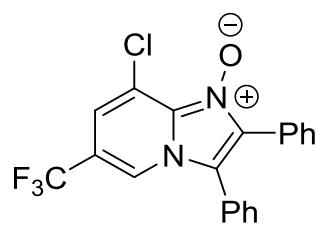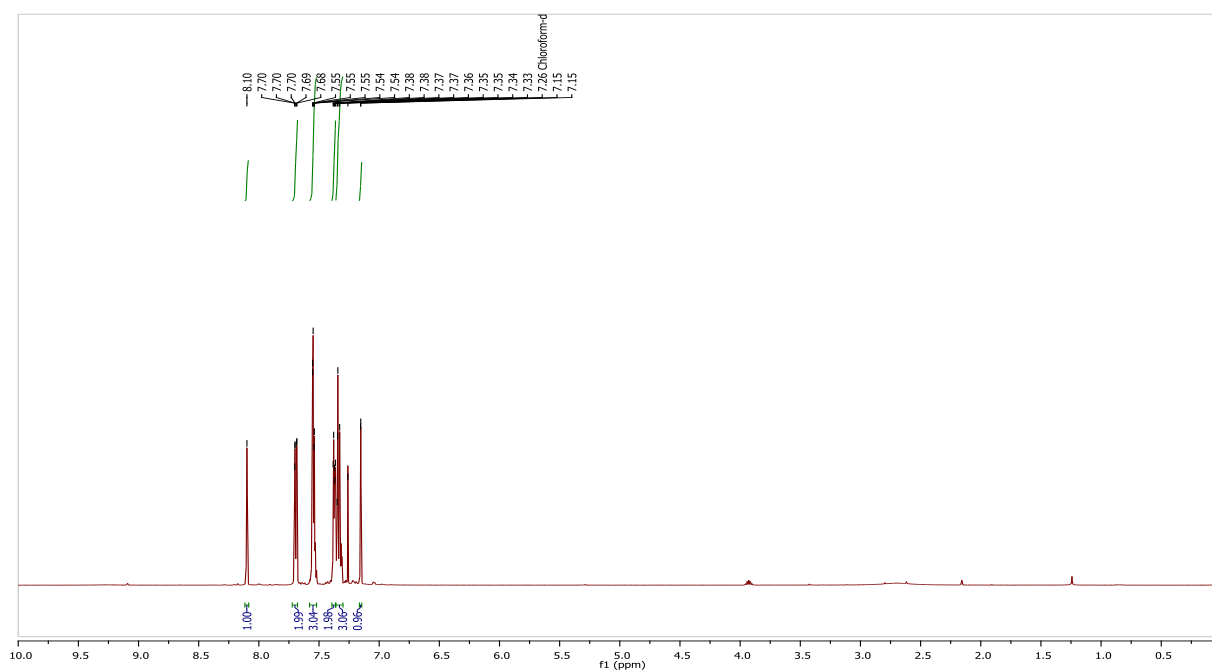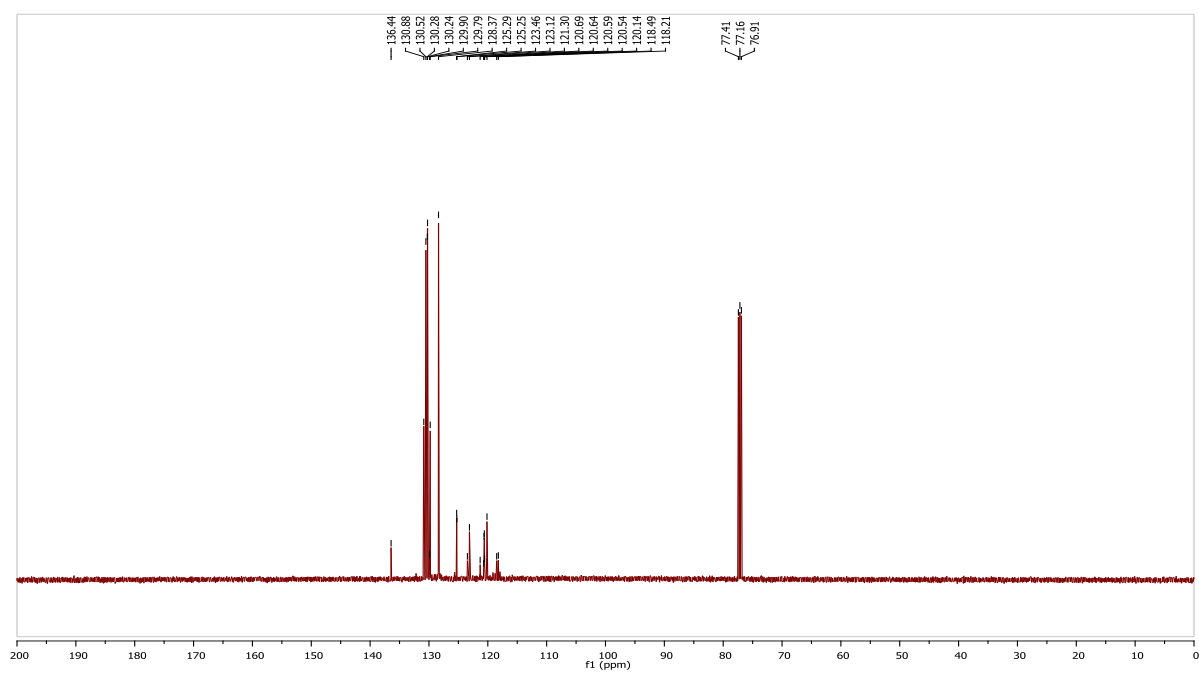

(3g)

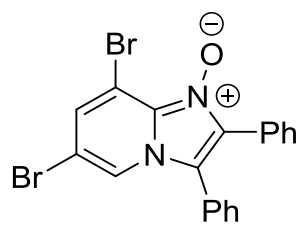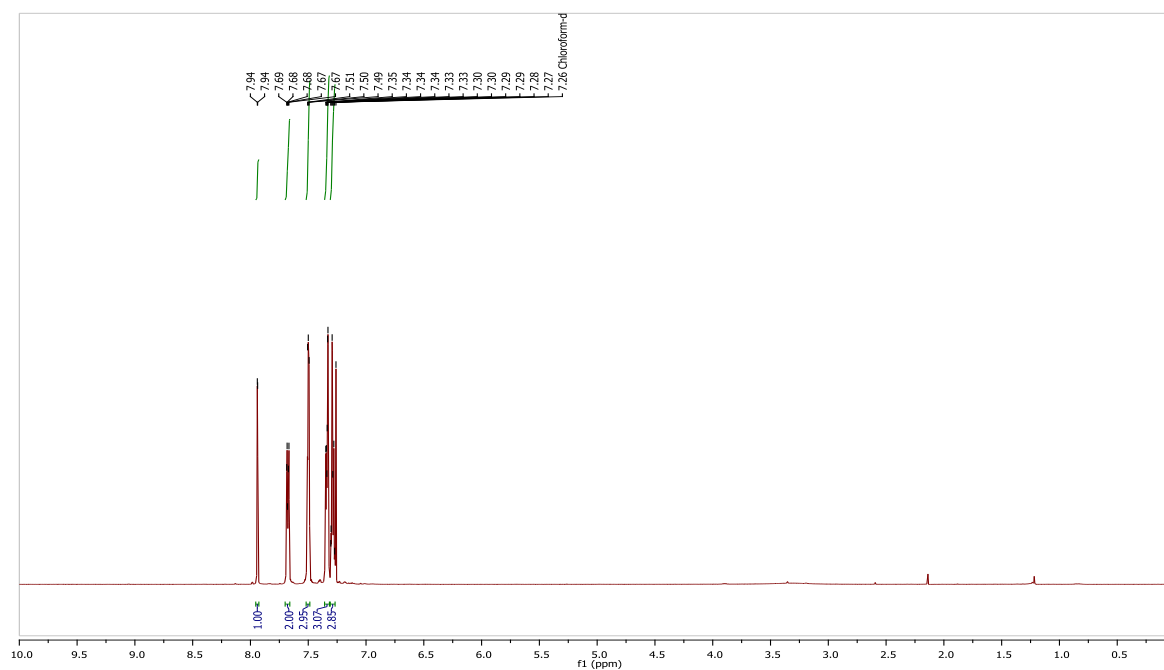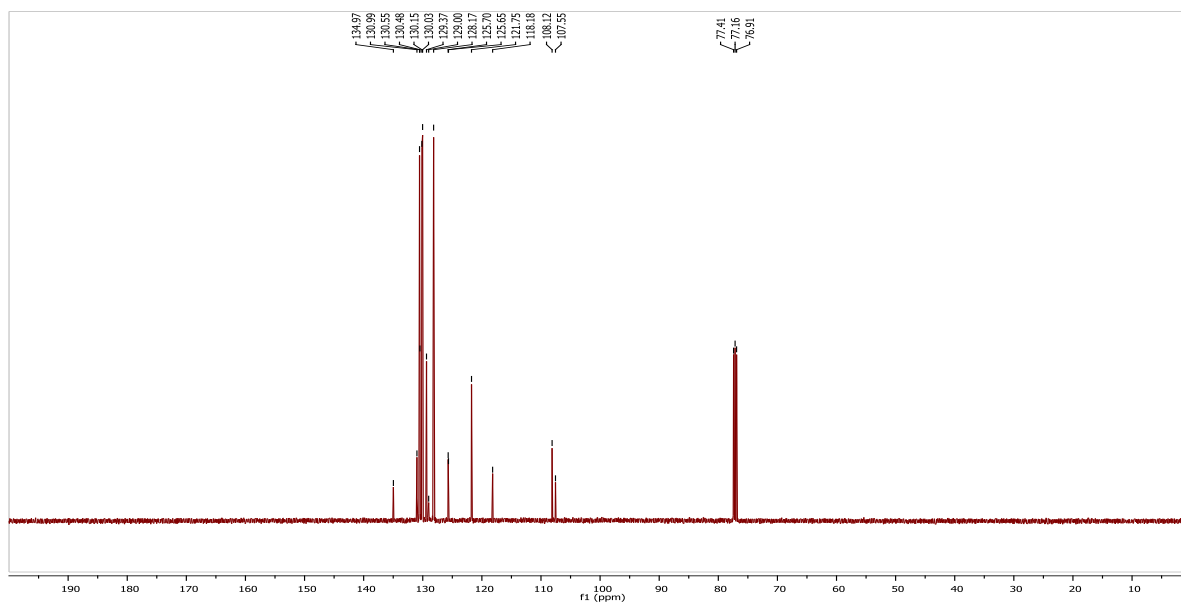

(3h)

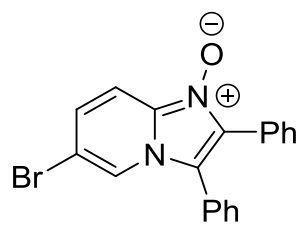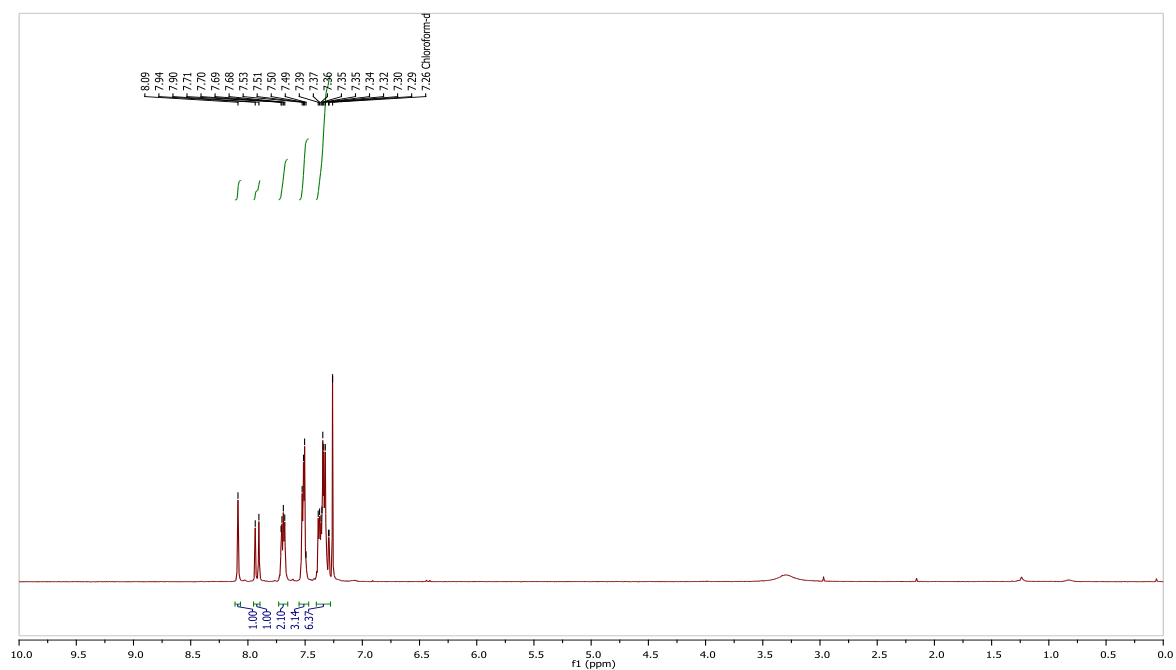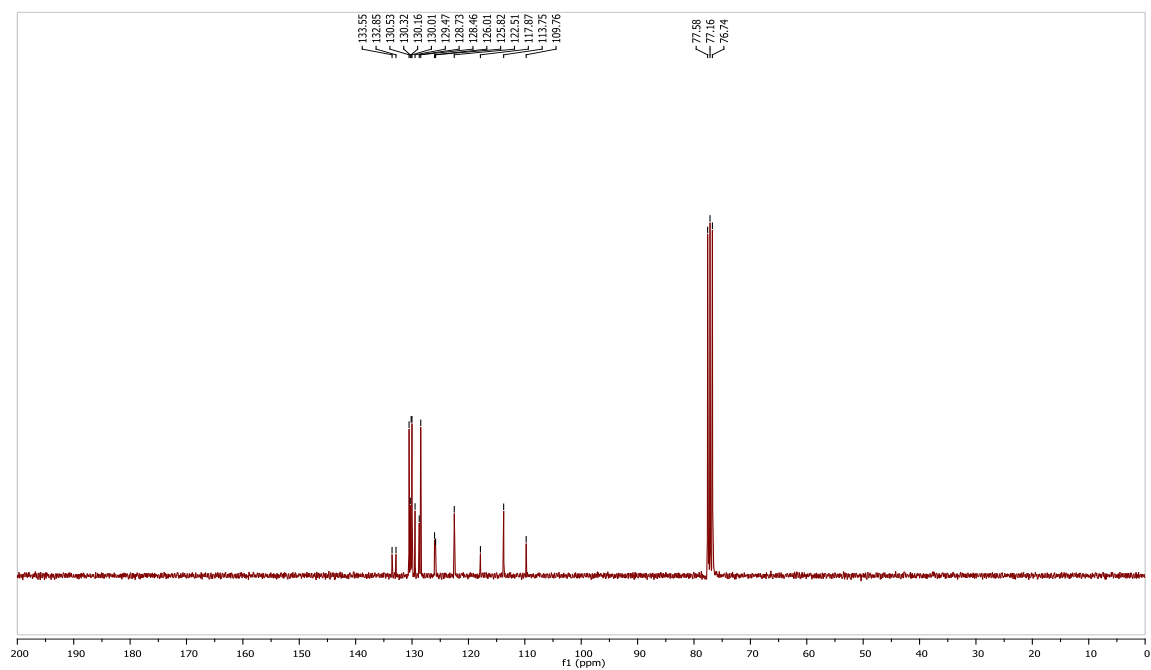

(3i)

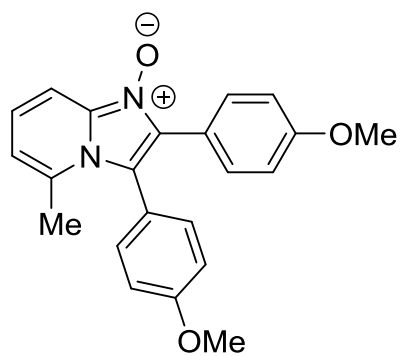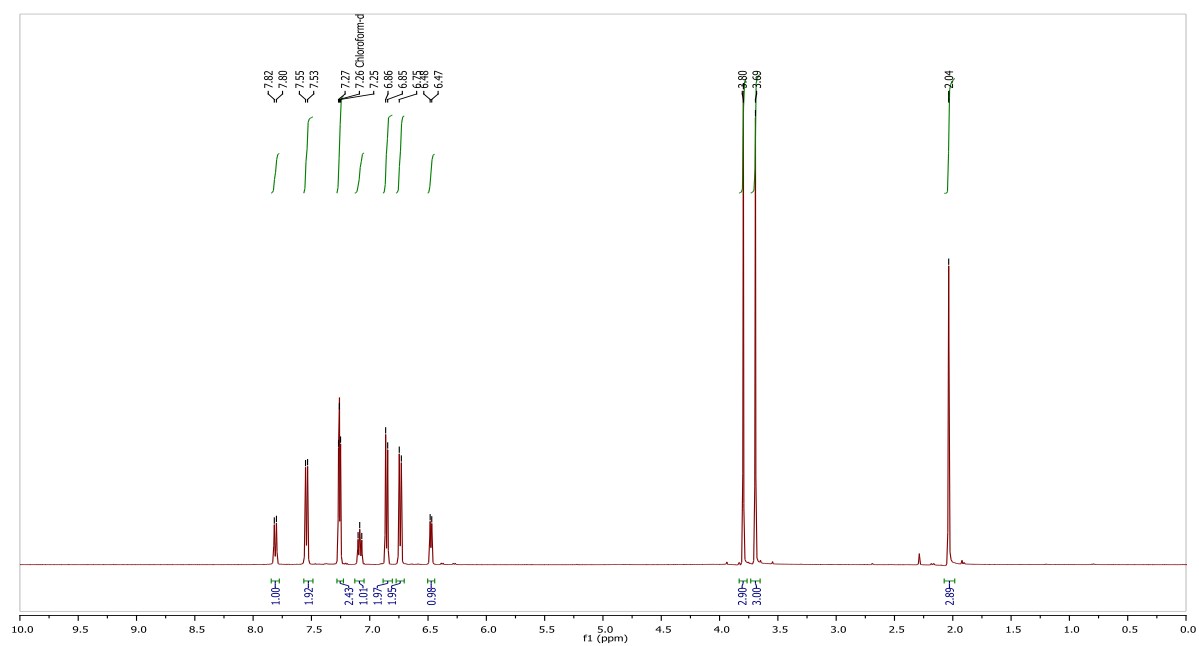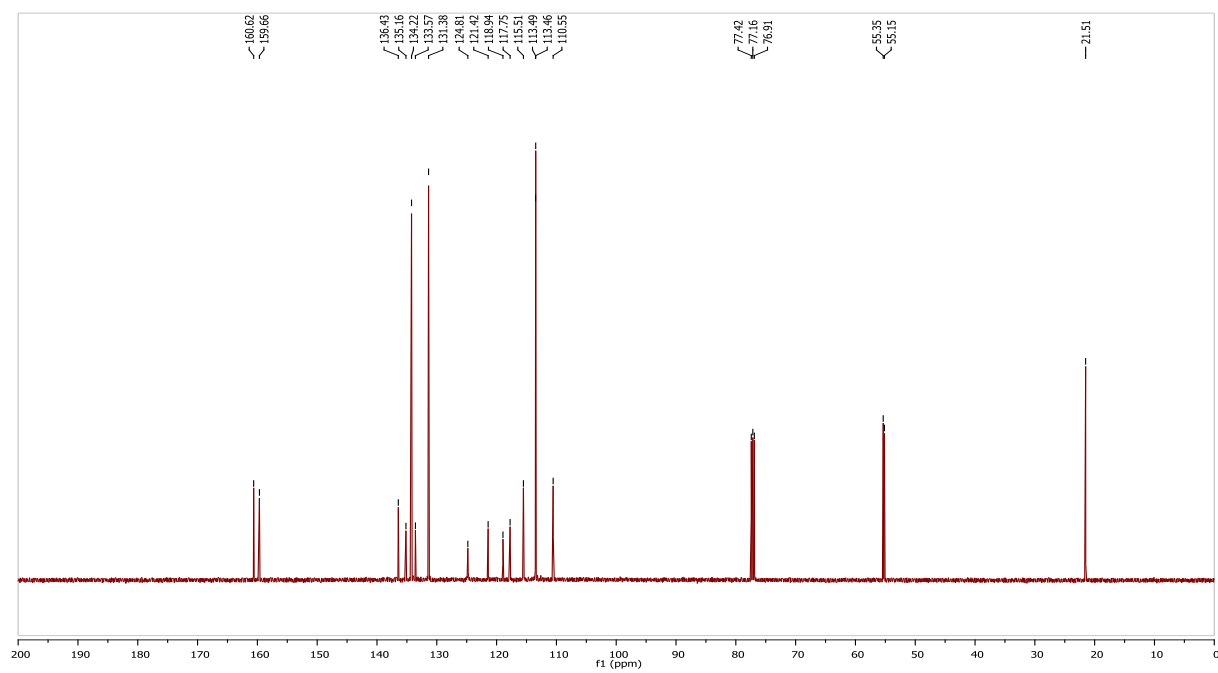

(3j)

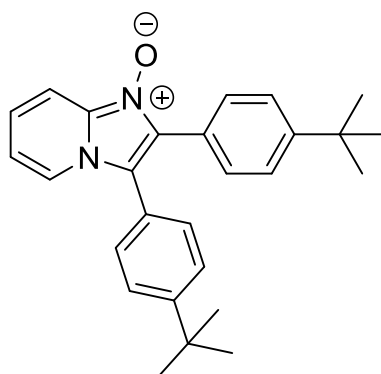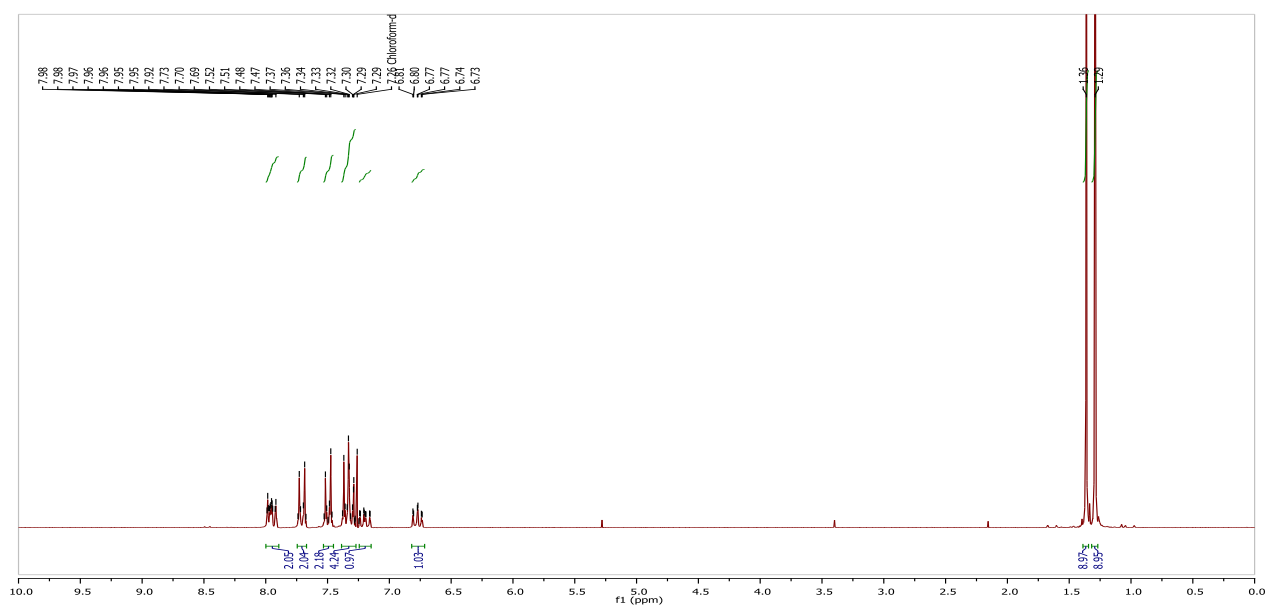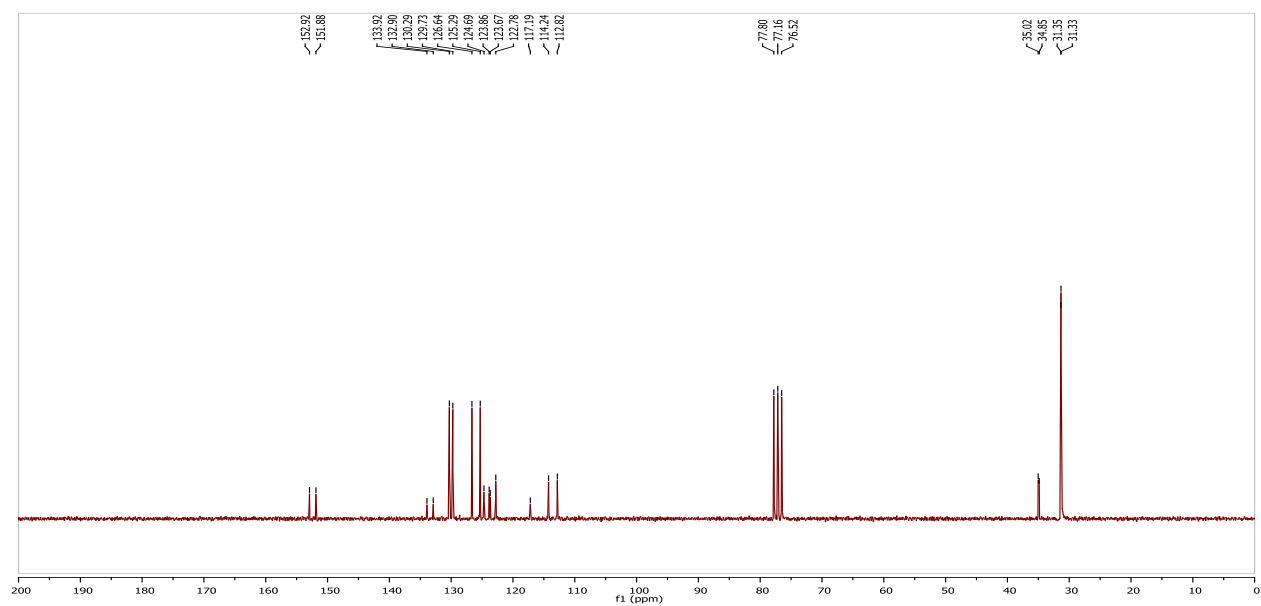

(3k)

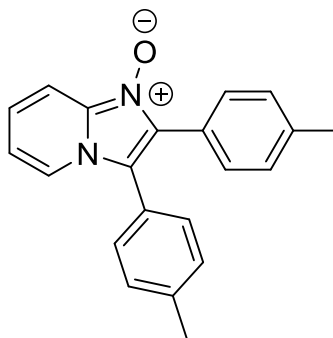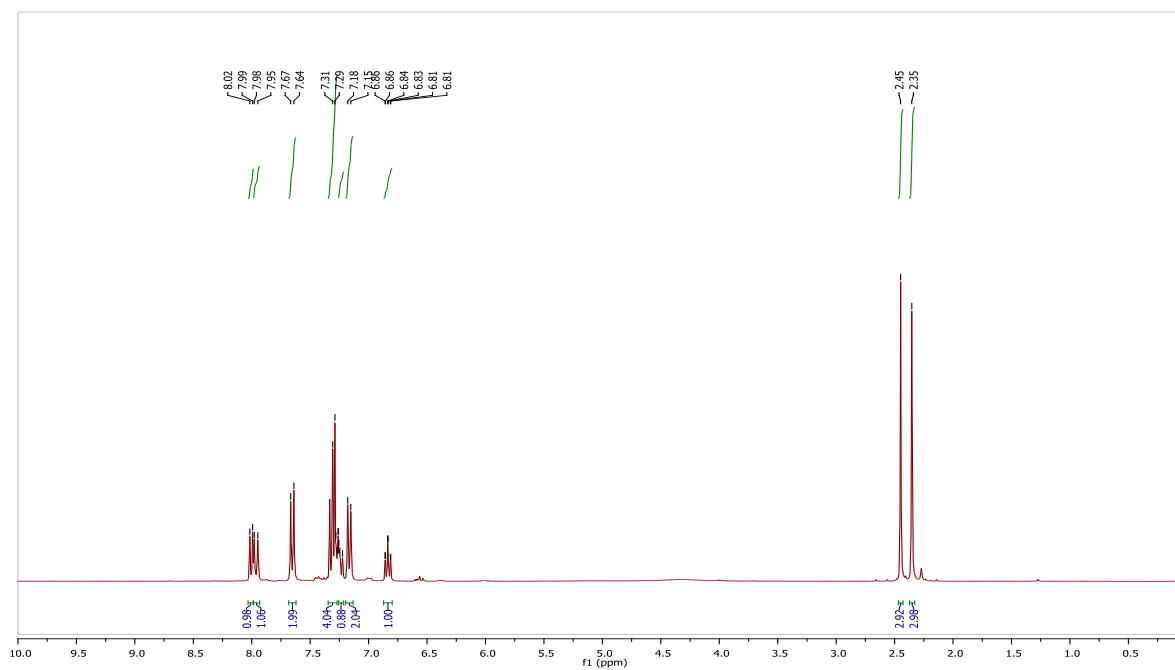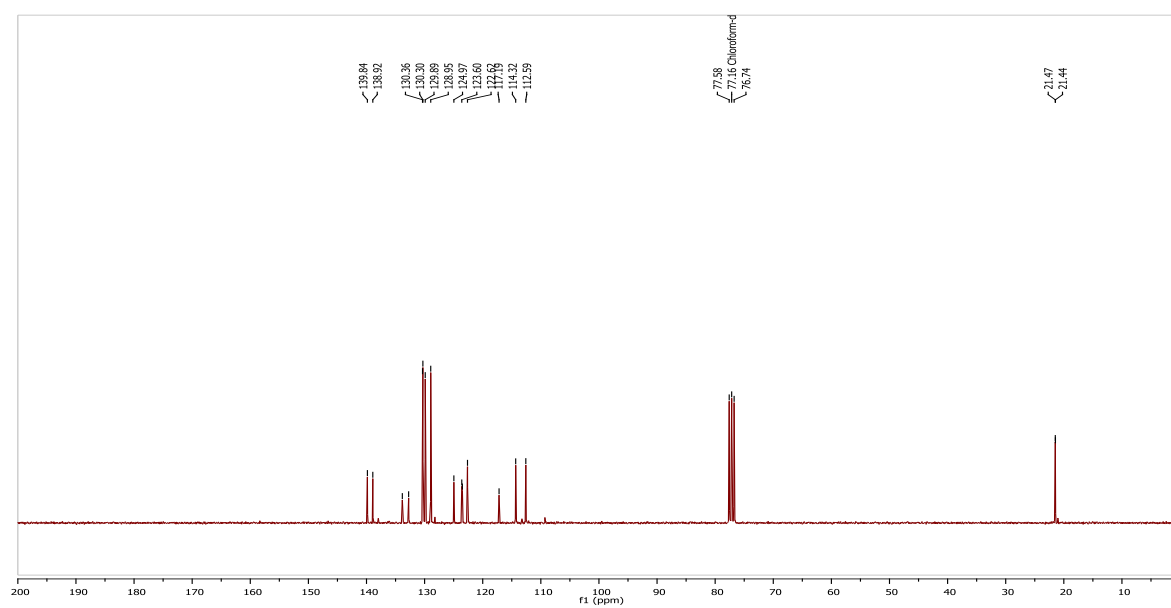

(31)

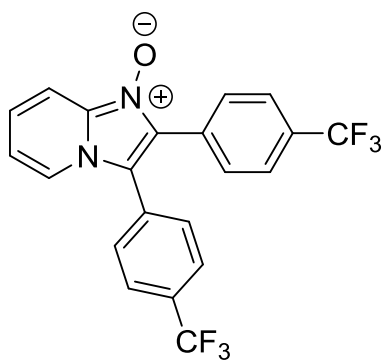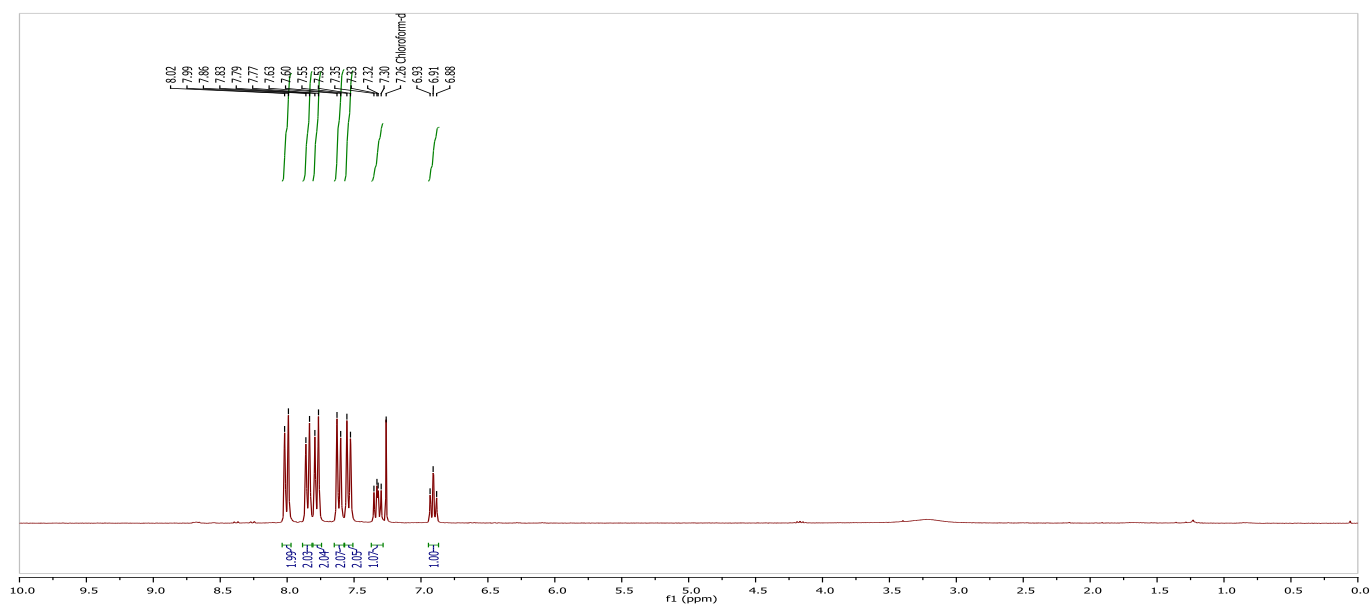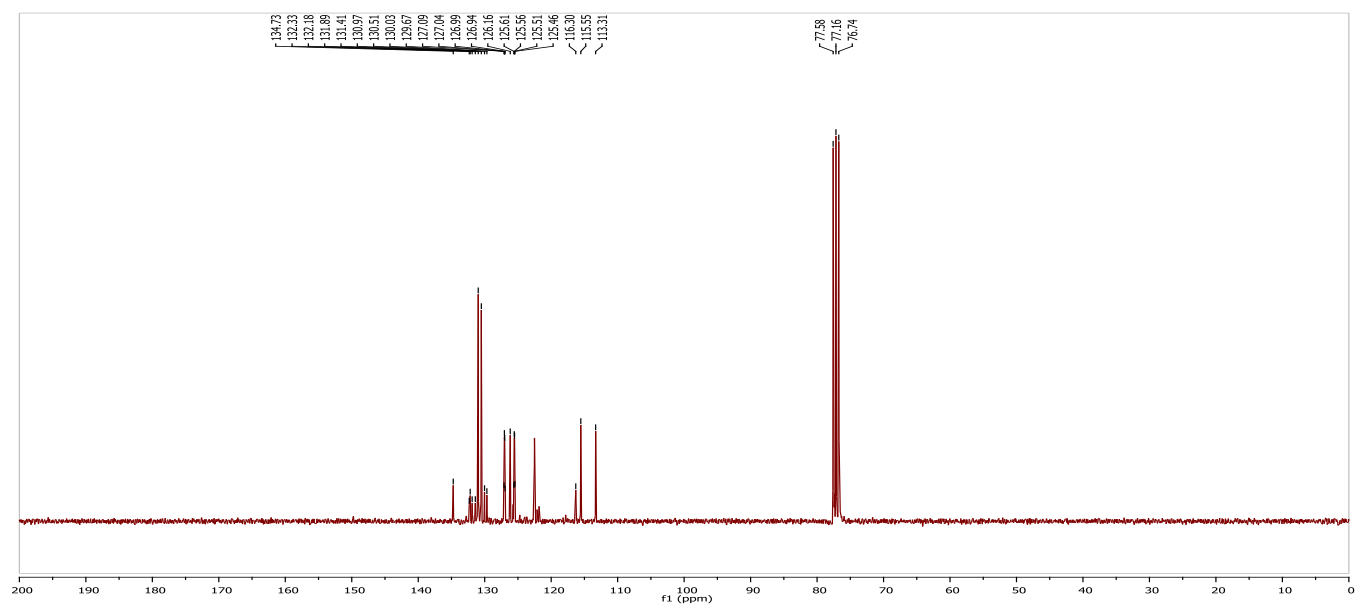

(3m)

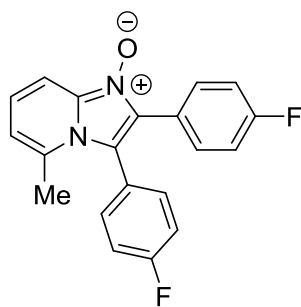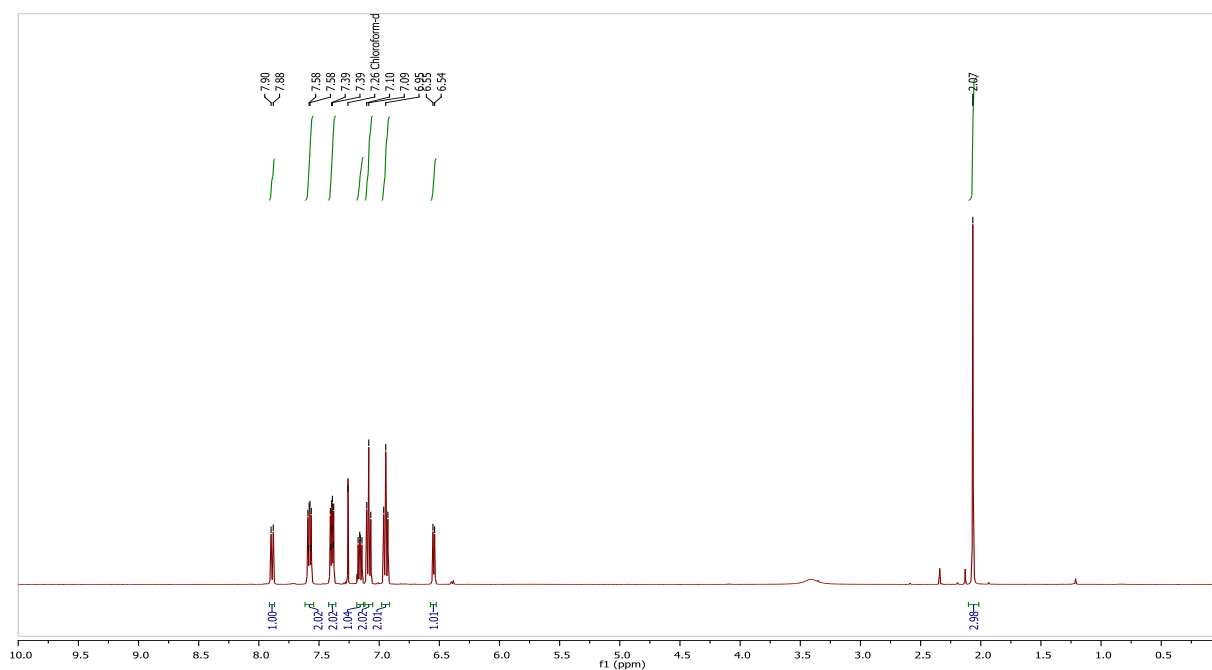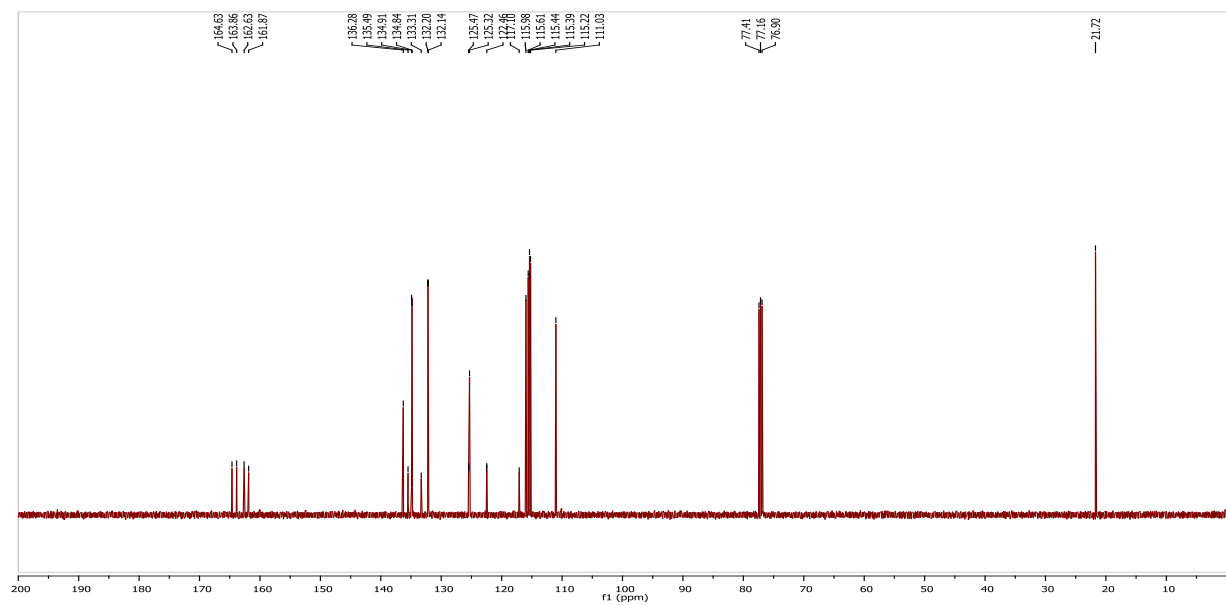



(3n)

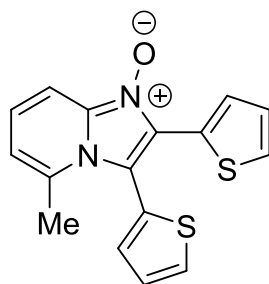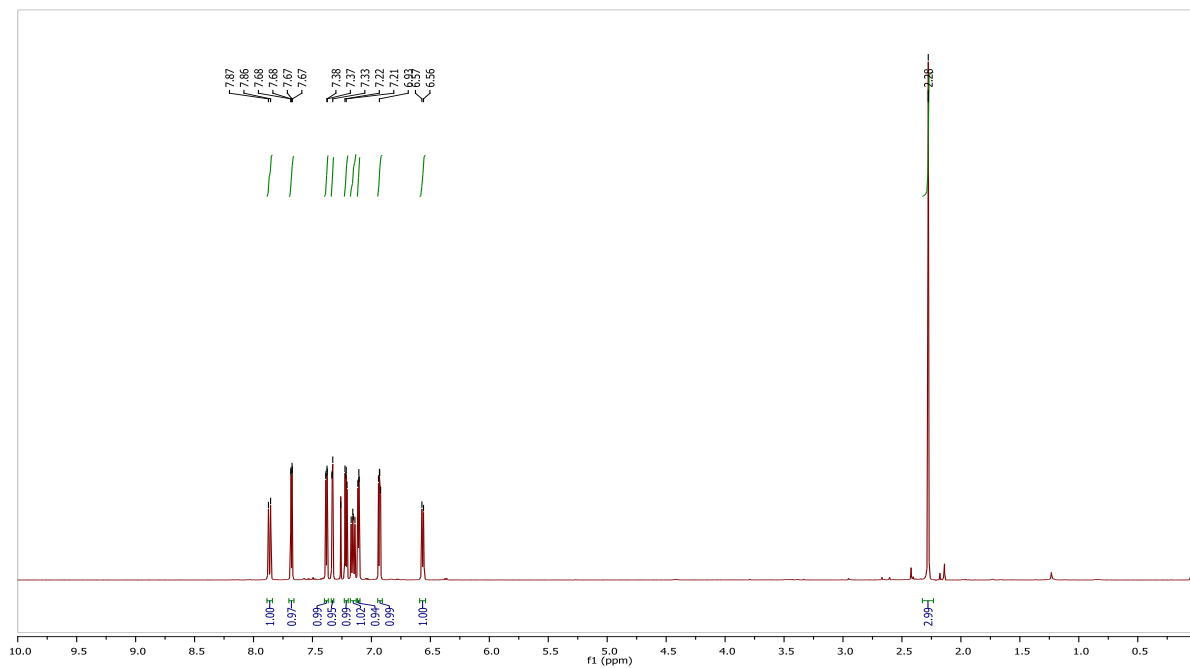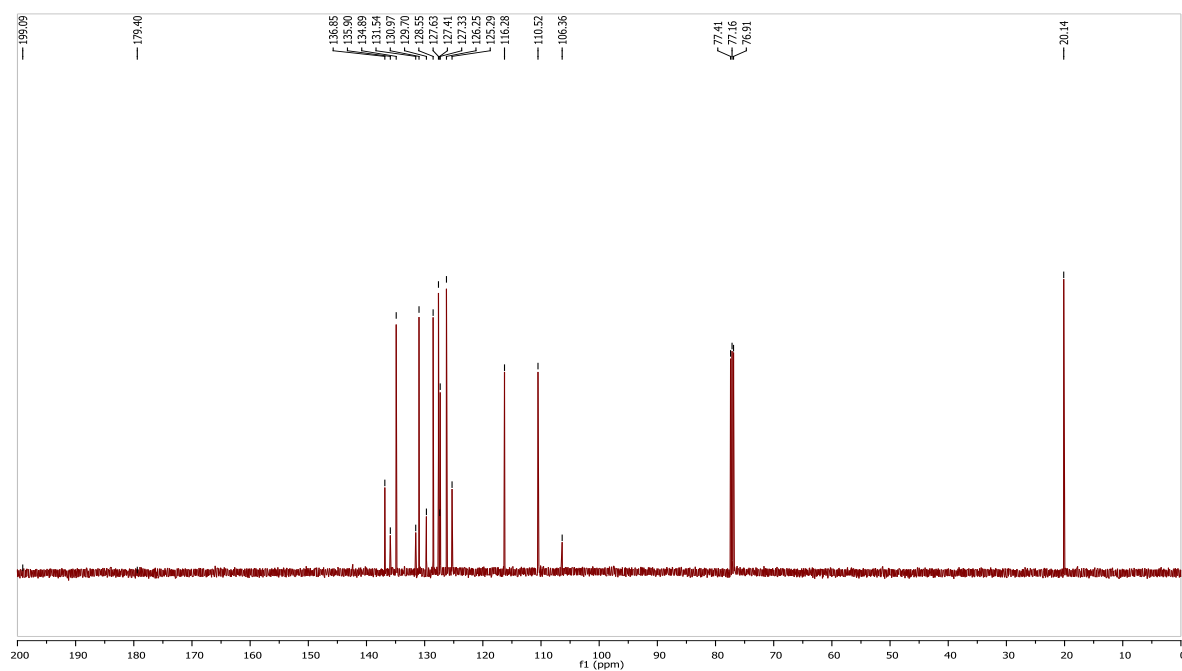

(30)

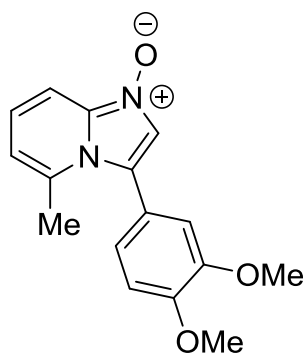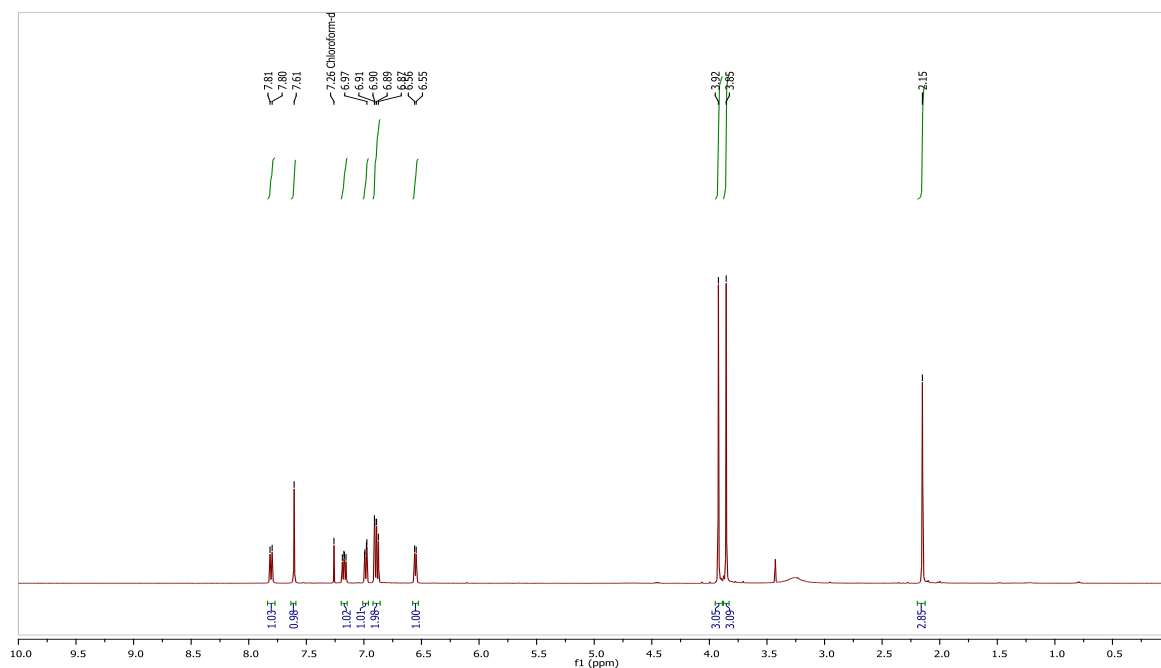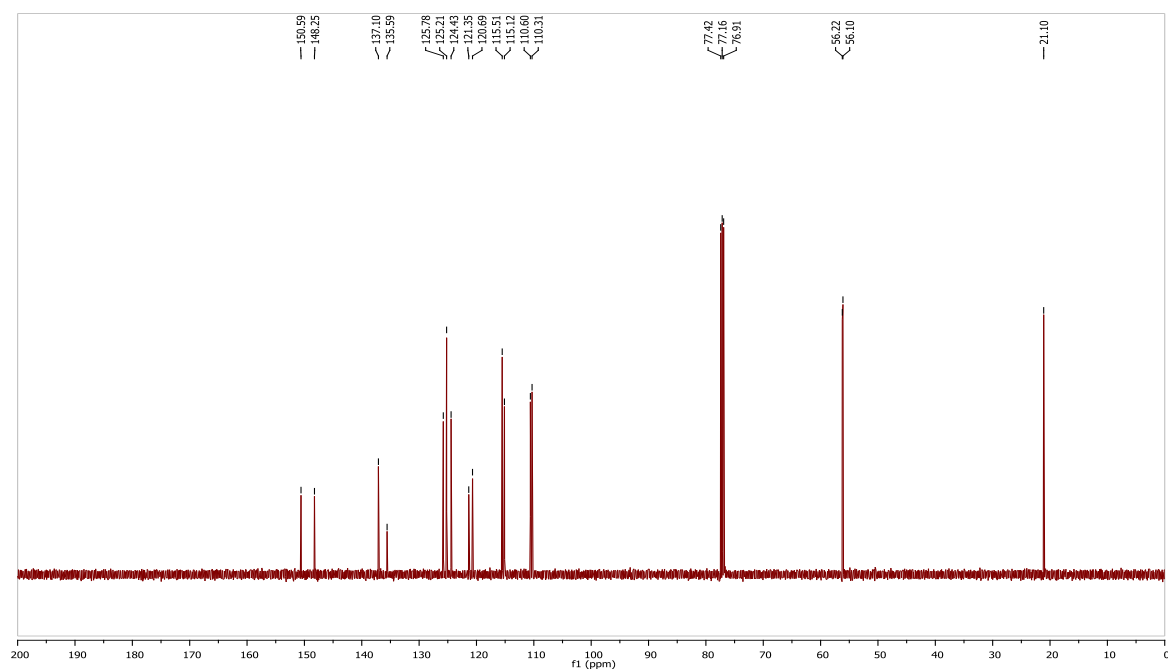

(3p)

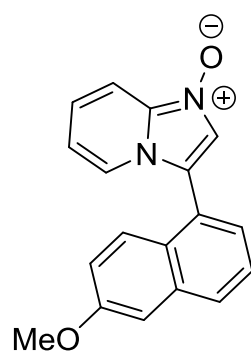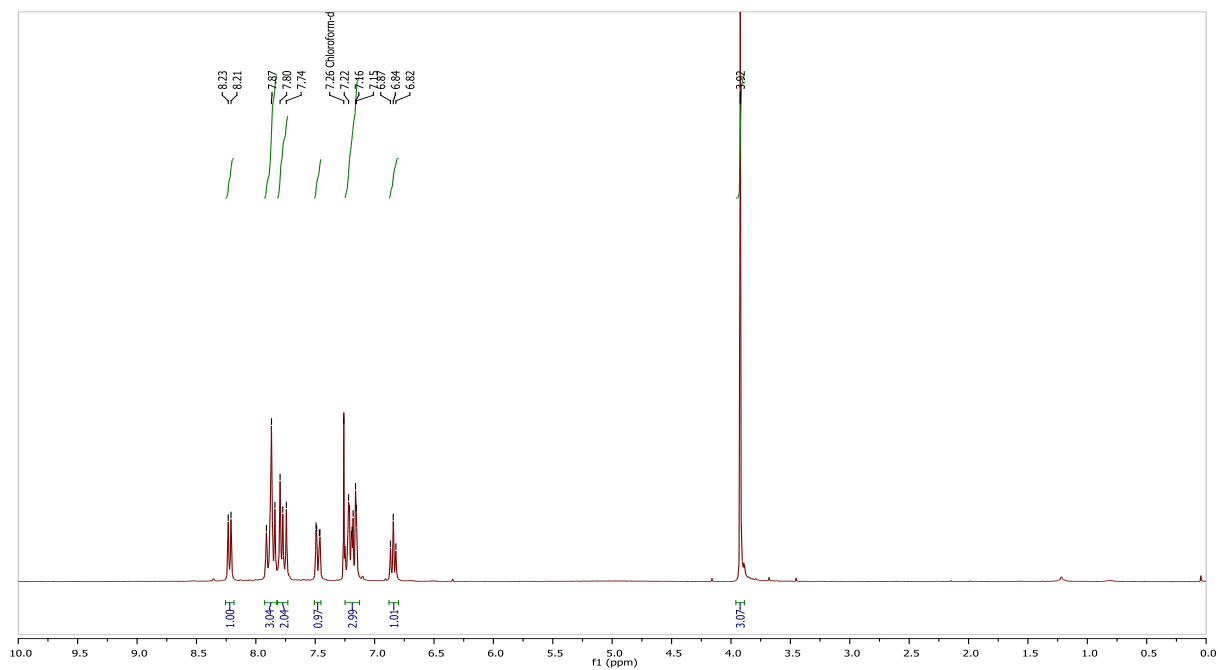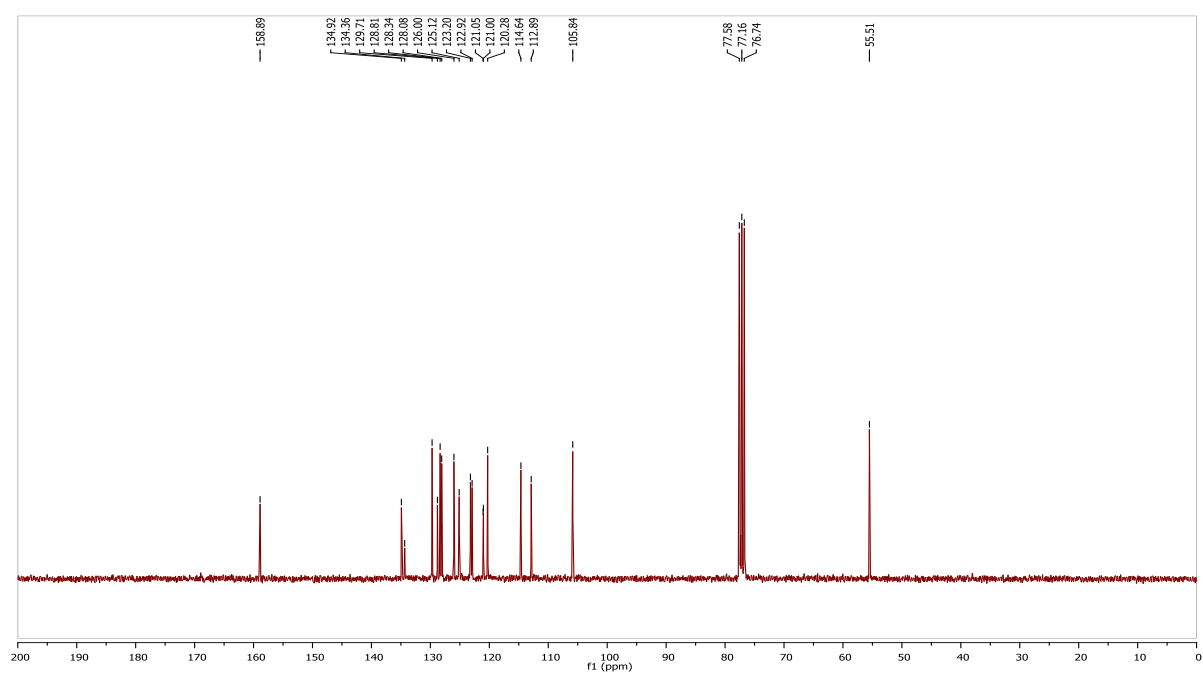

(3q)

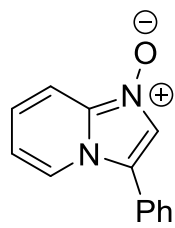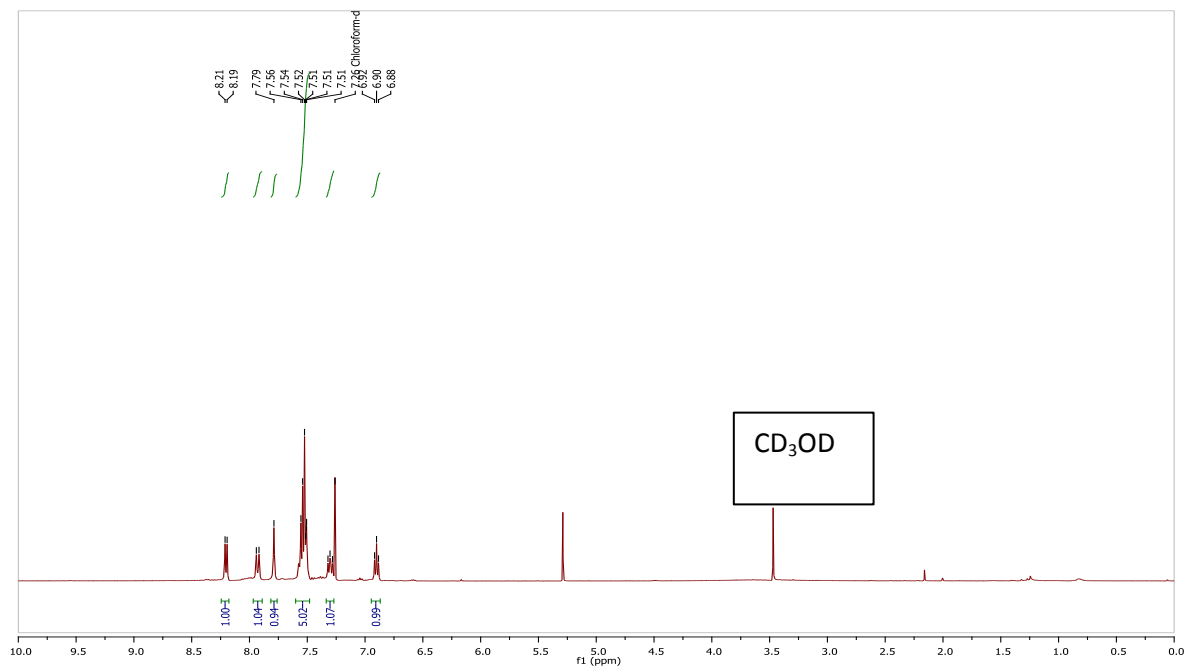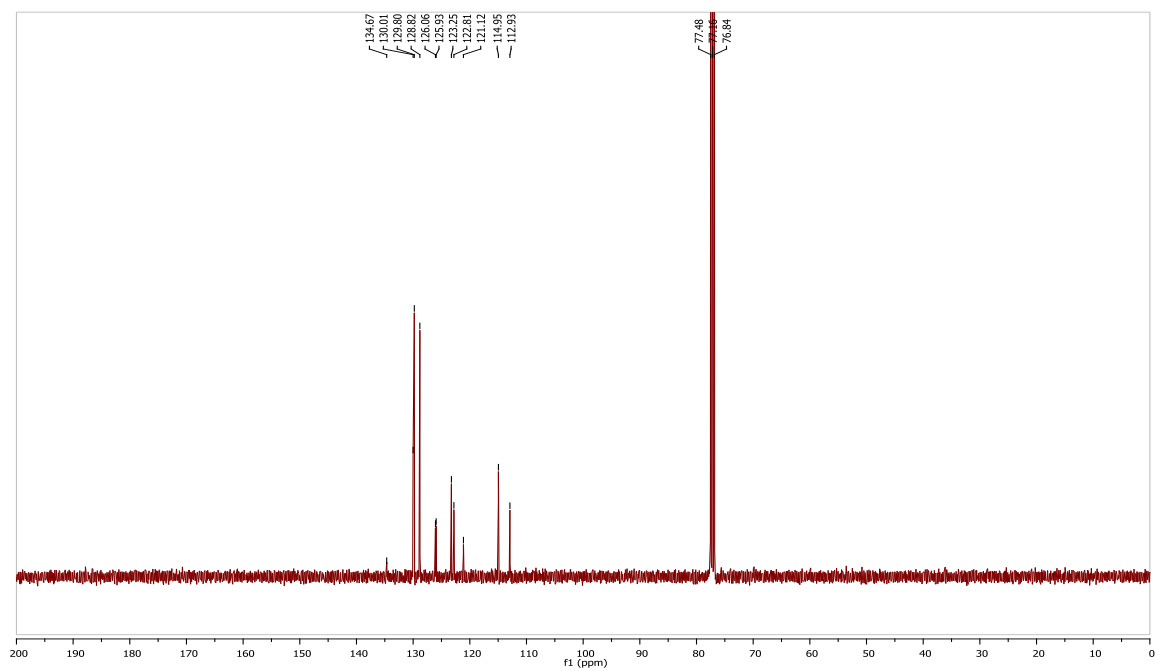

(3r)

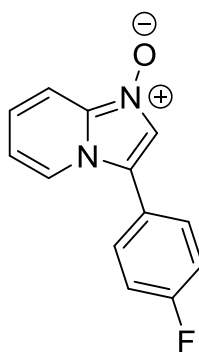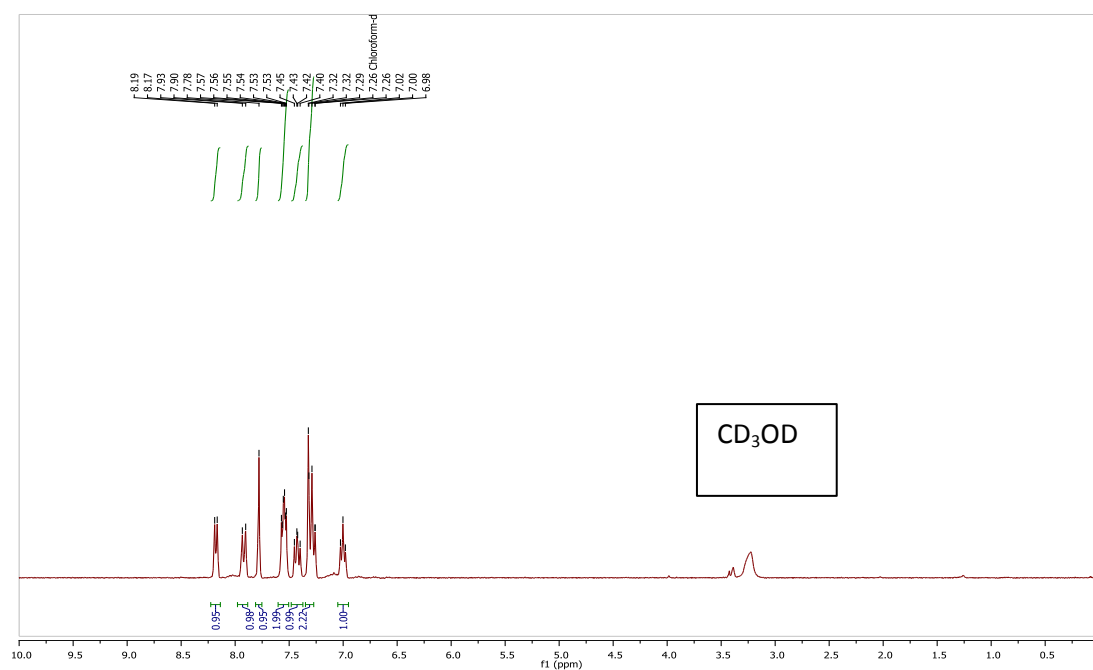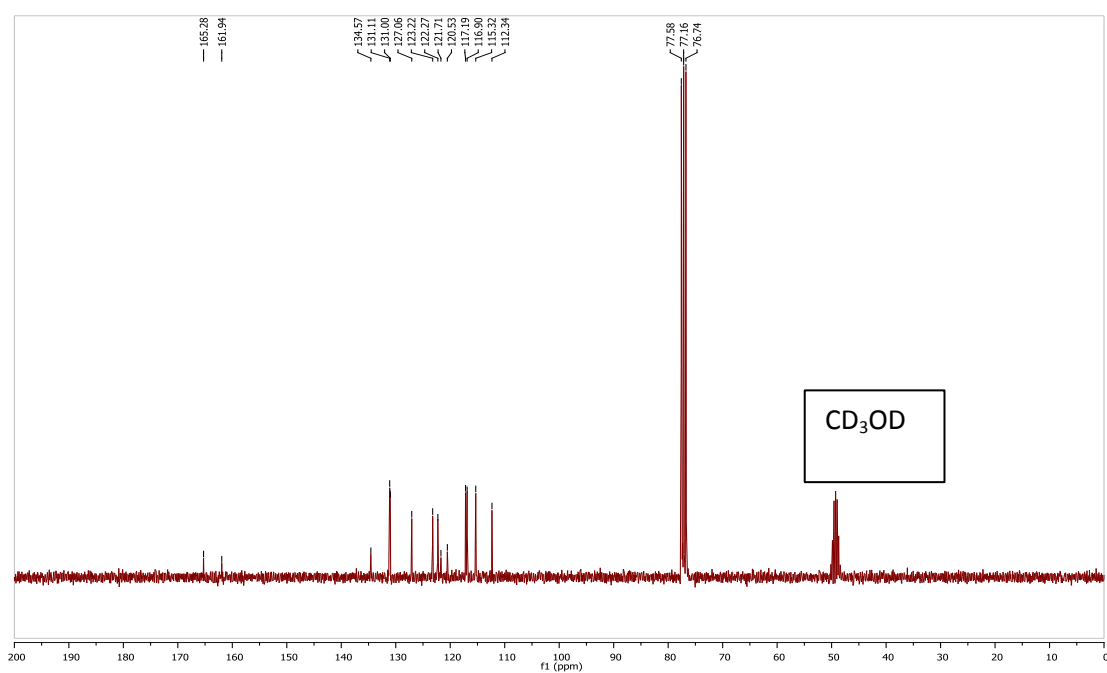

(3s)

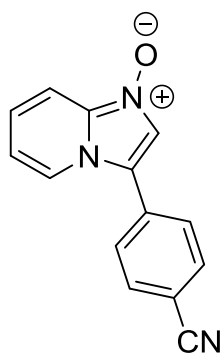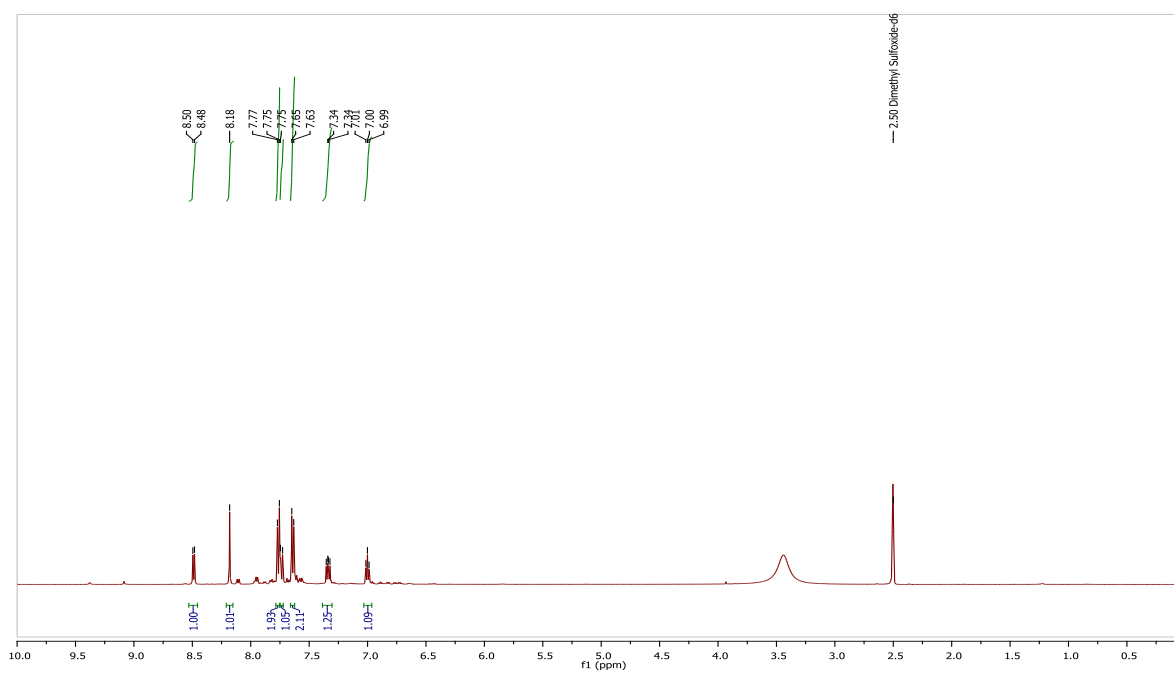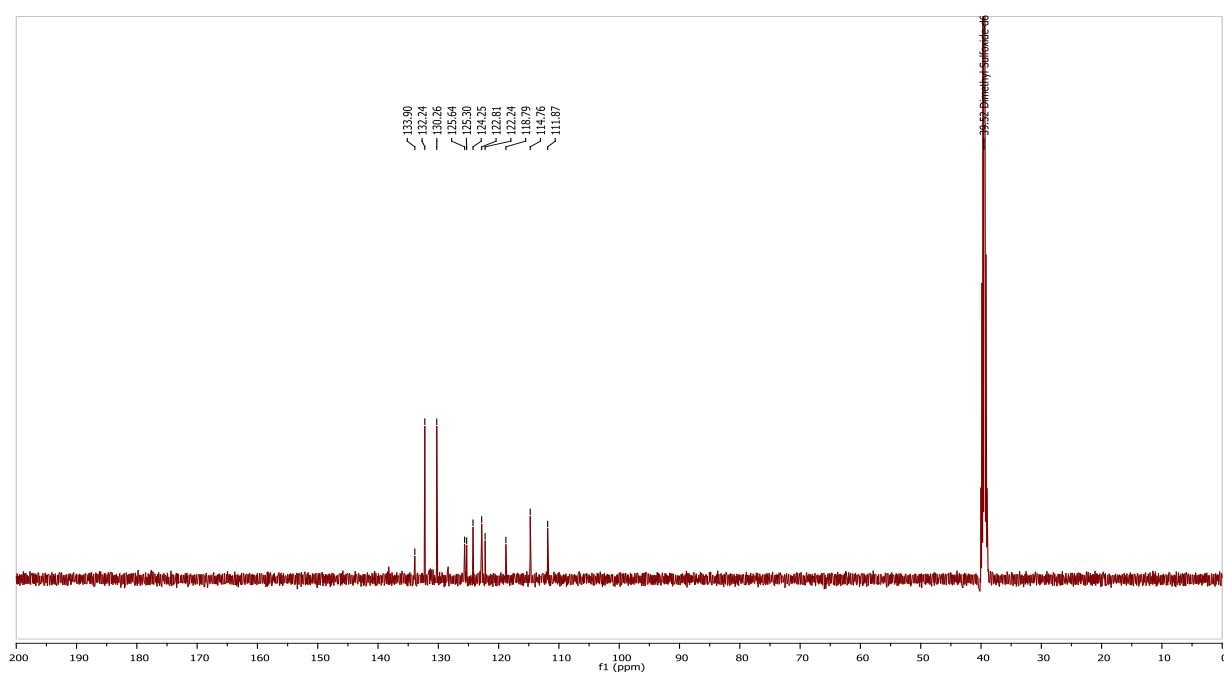

(3t)

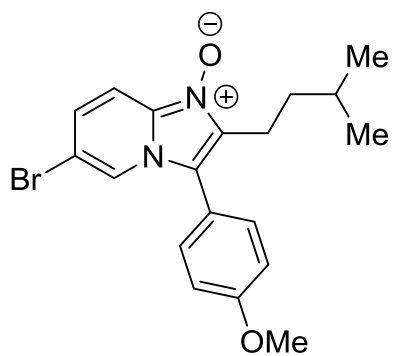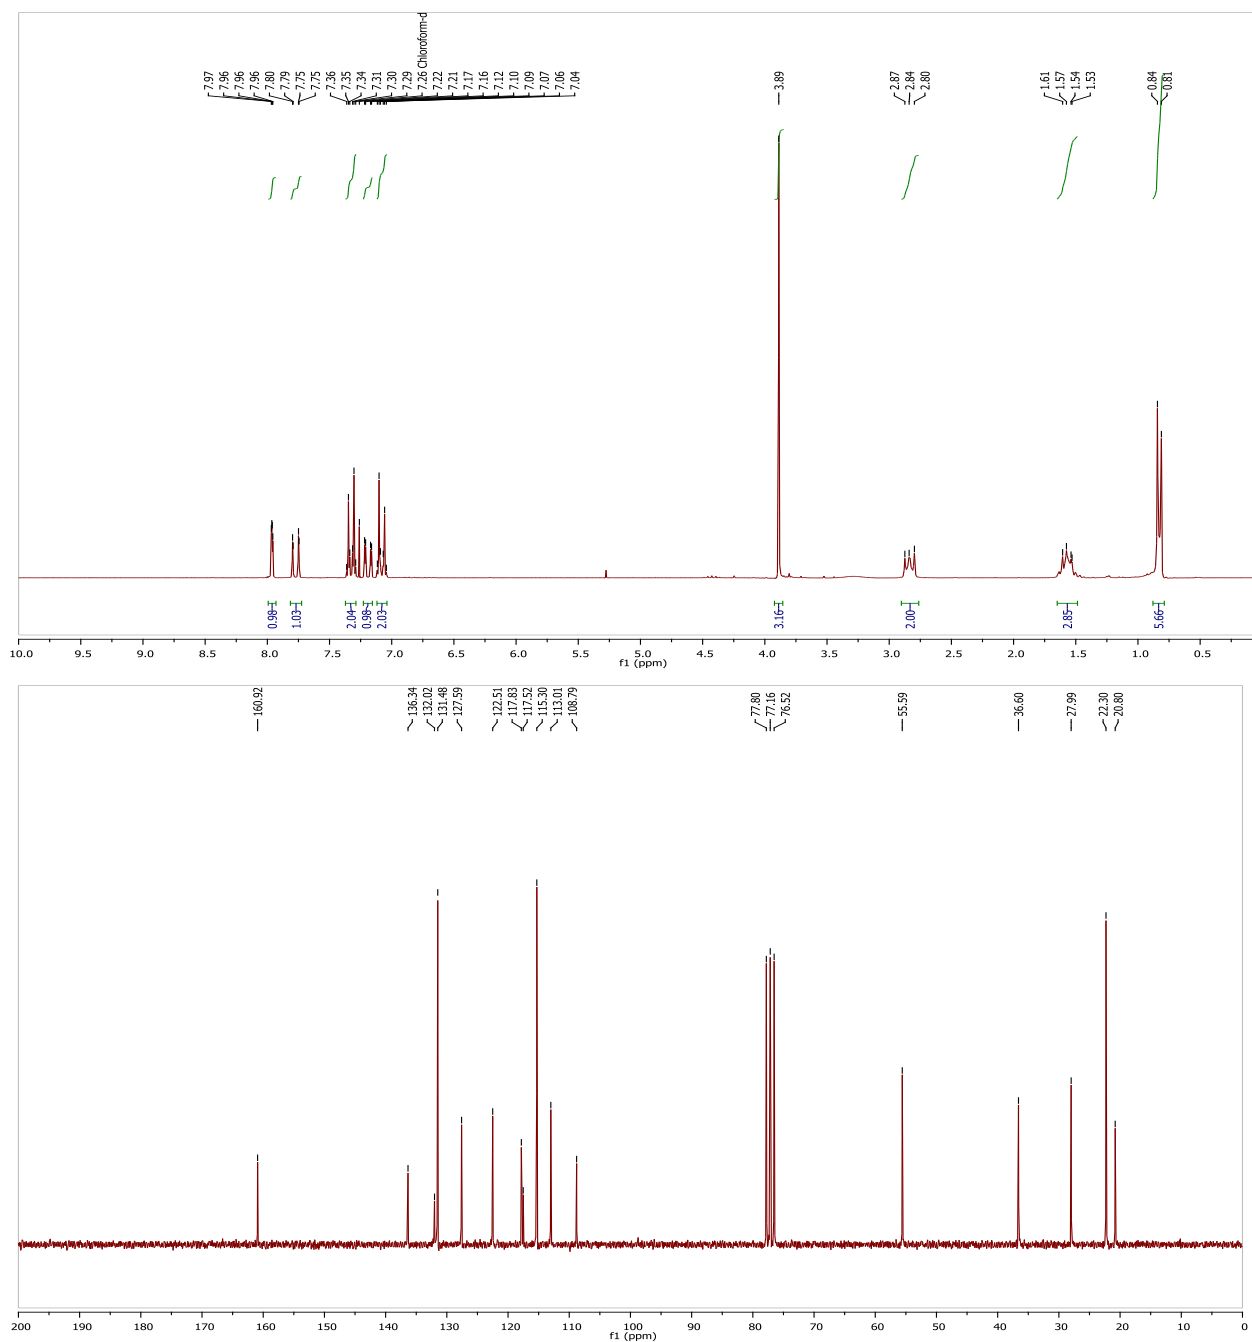

(3u)

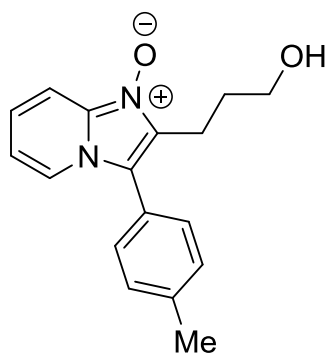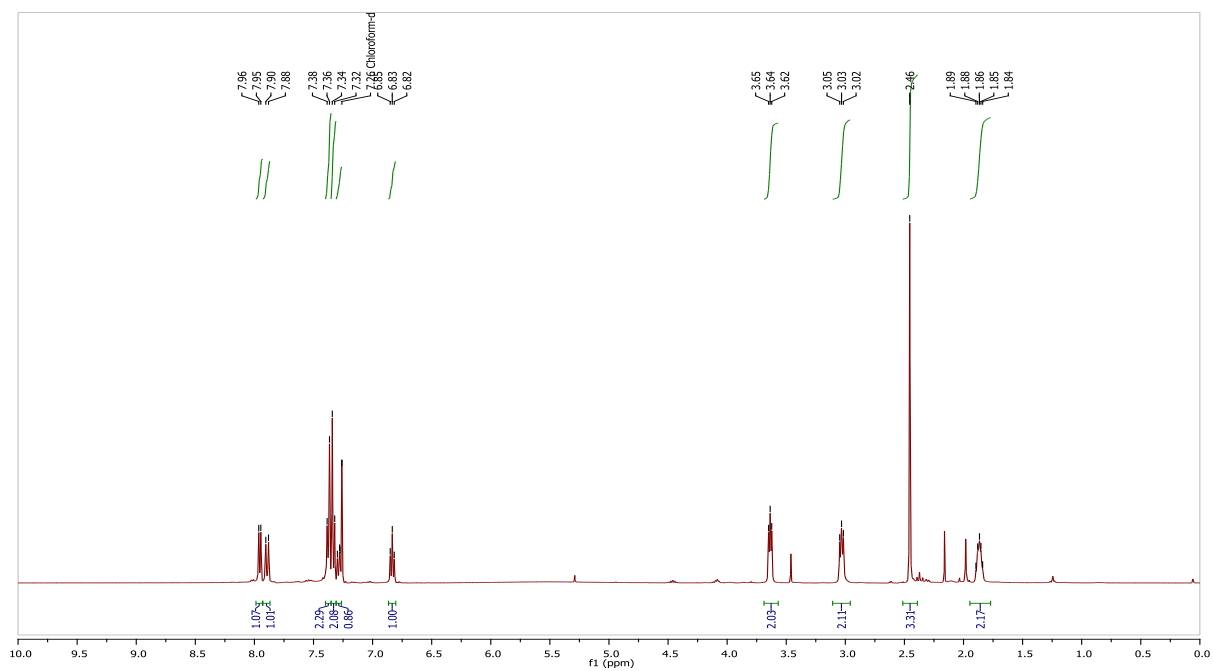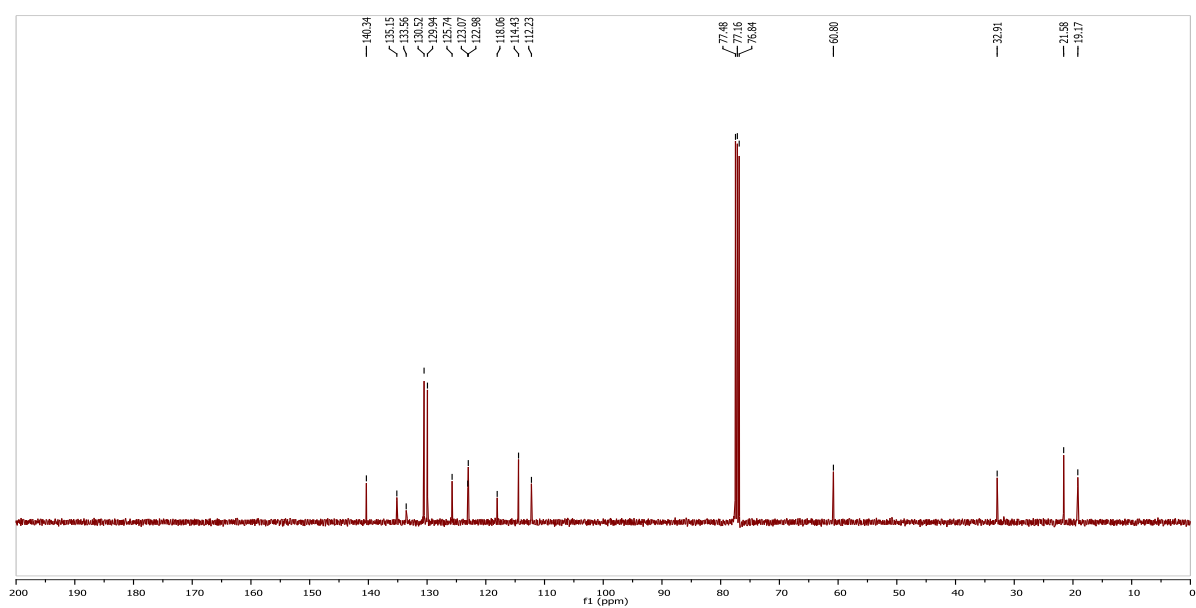



(3v)

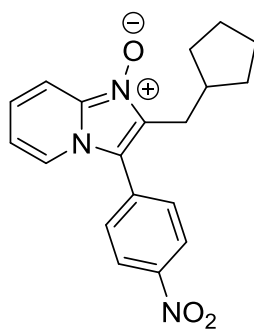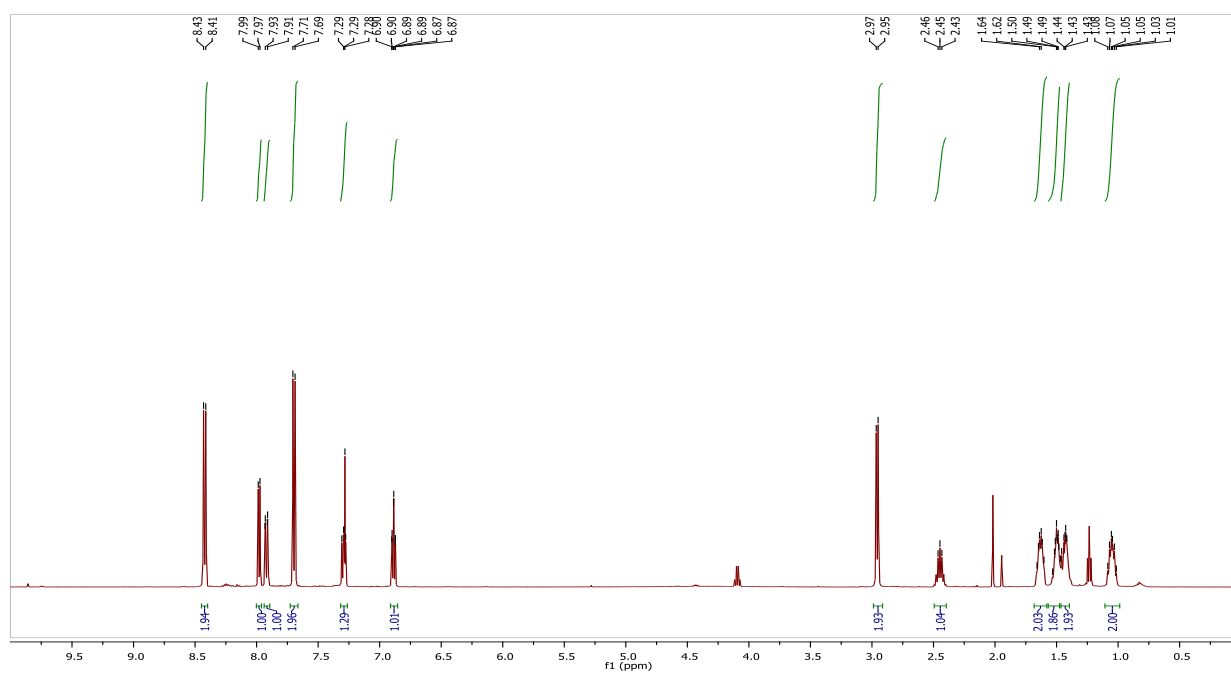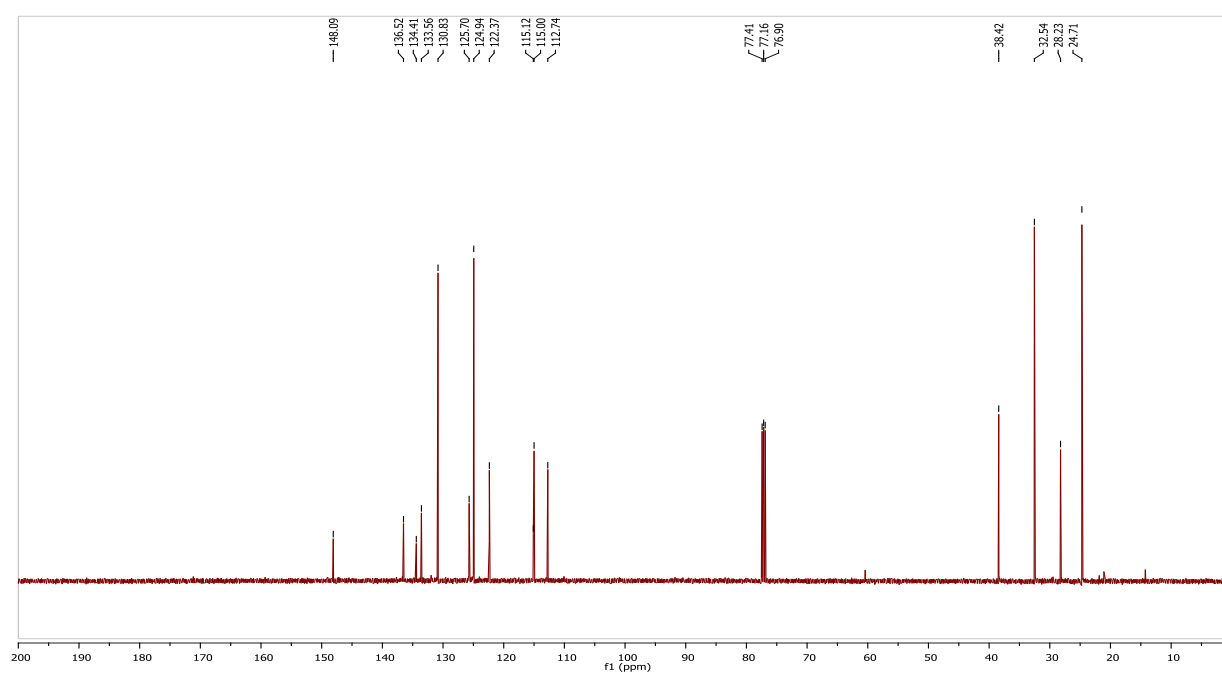

(3w)

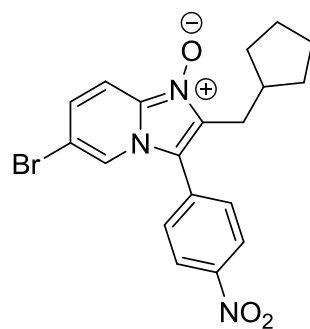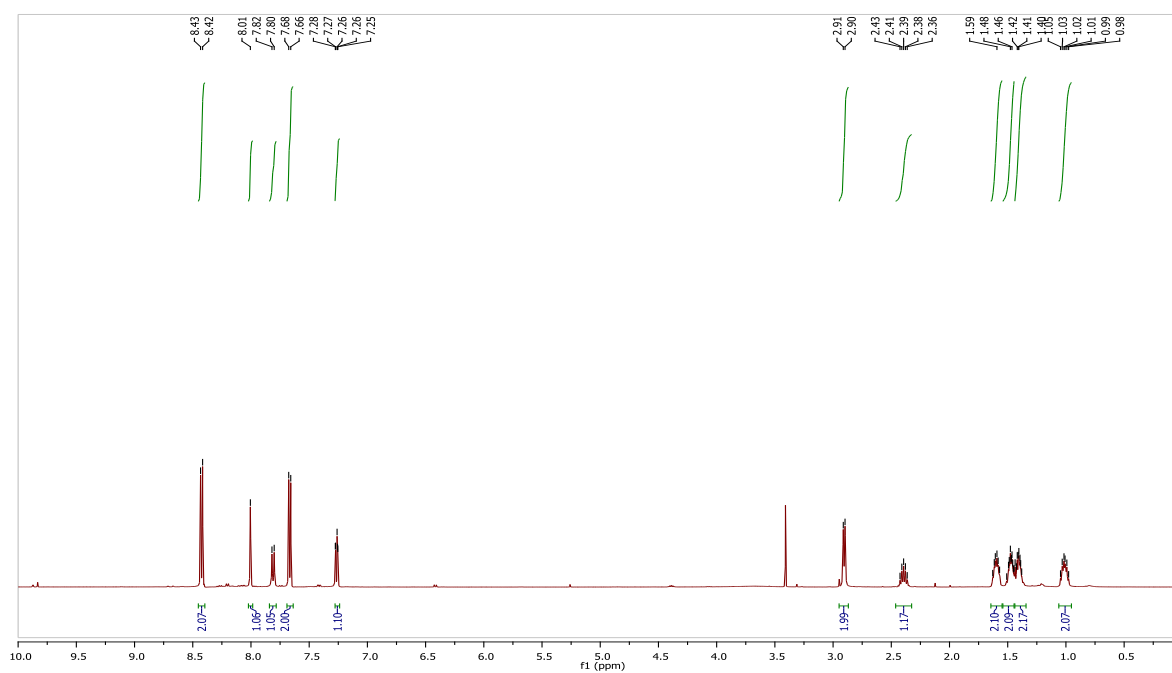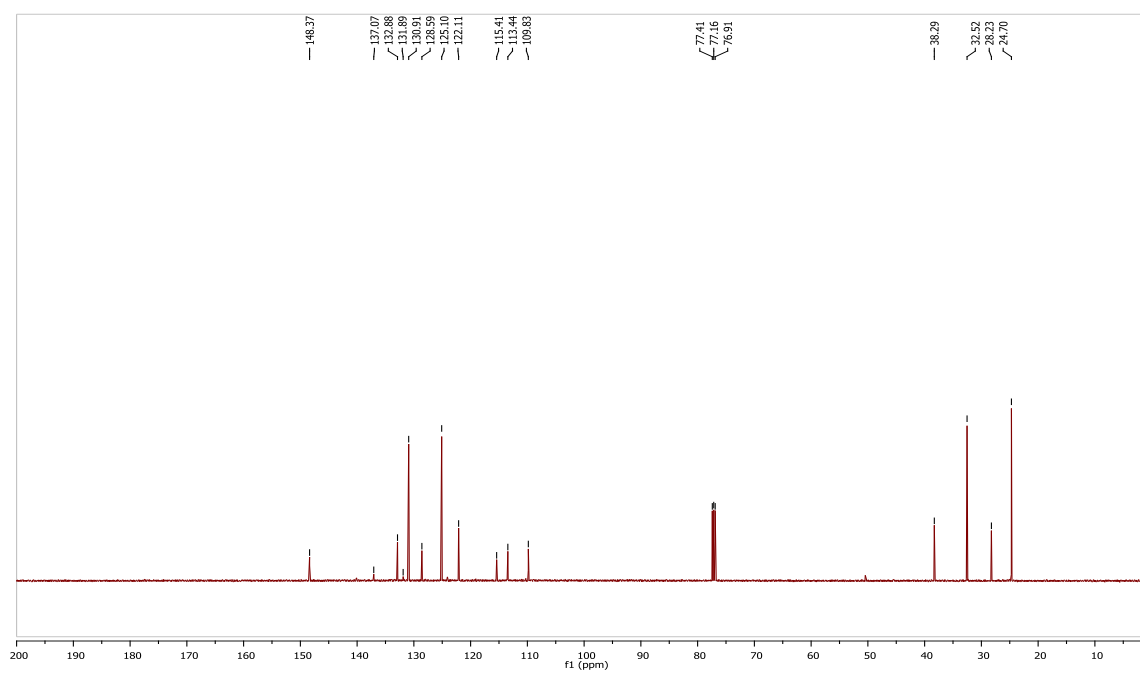

# NOE of 3w

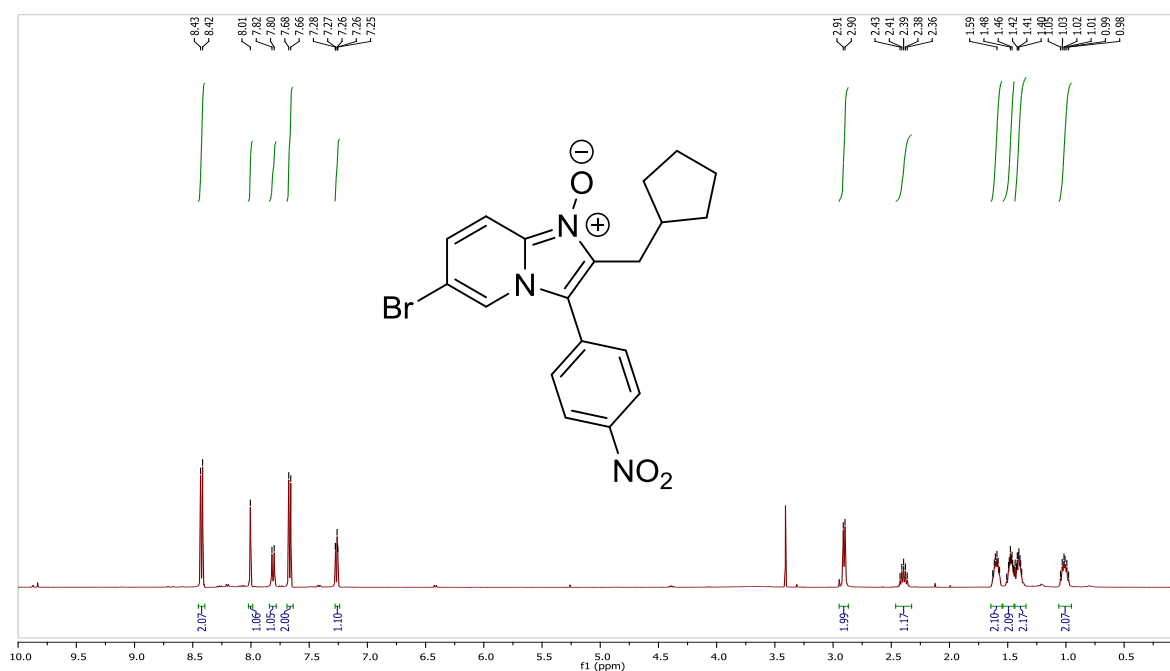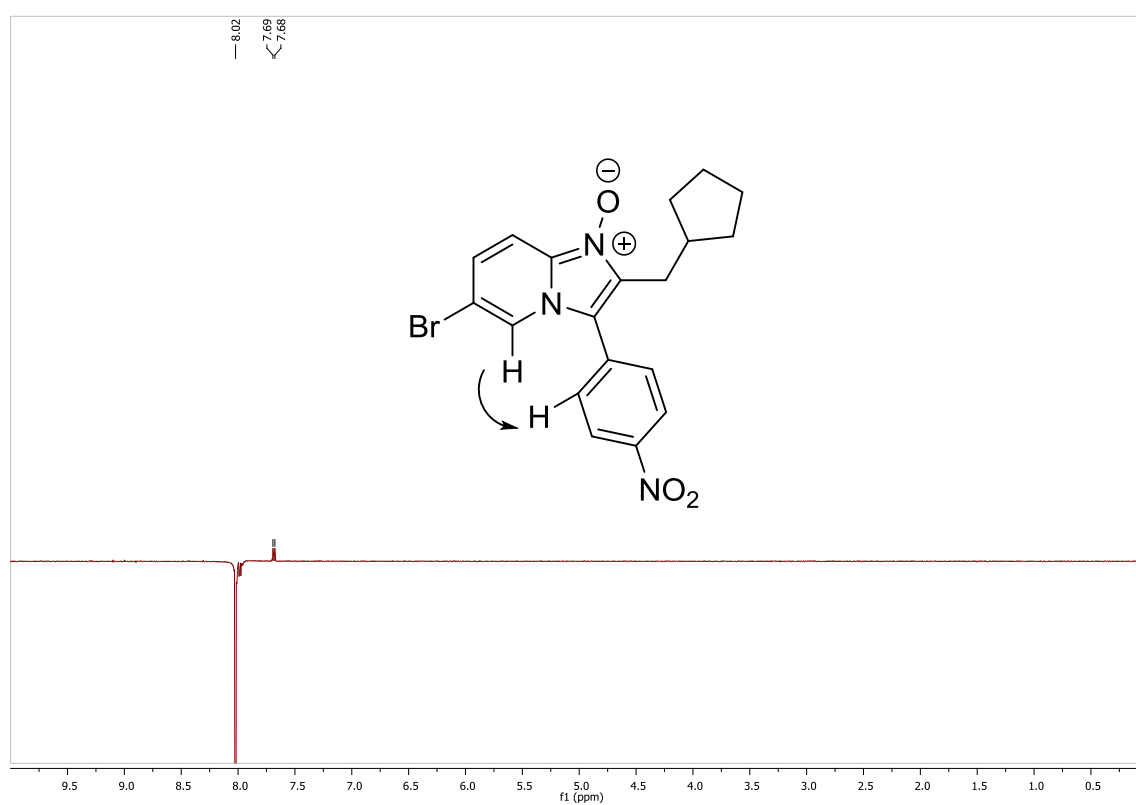

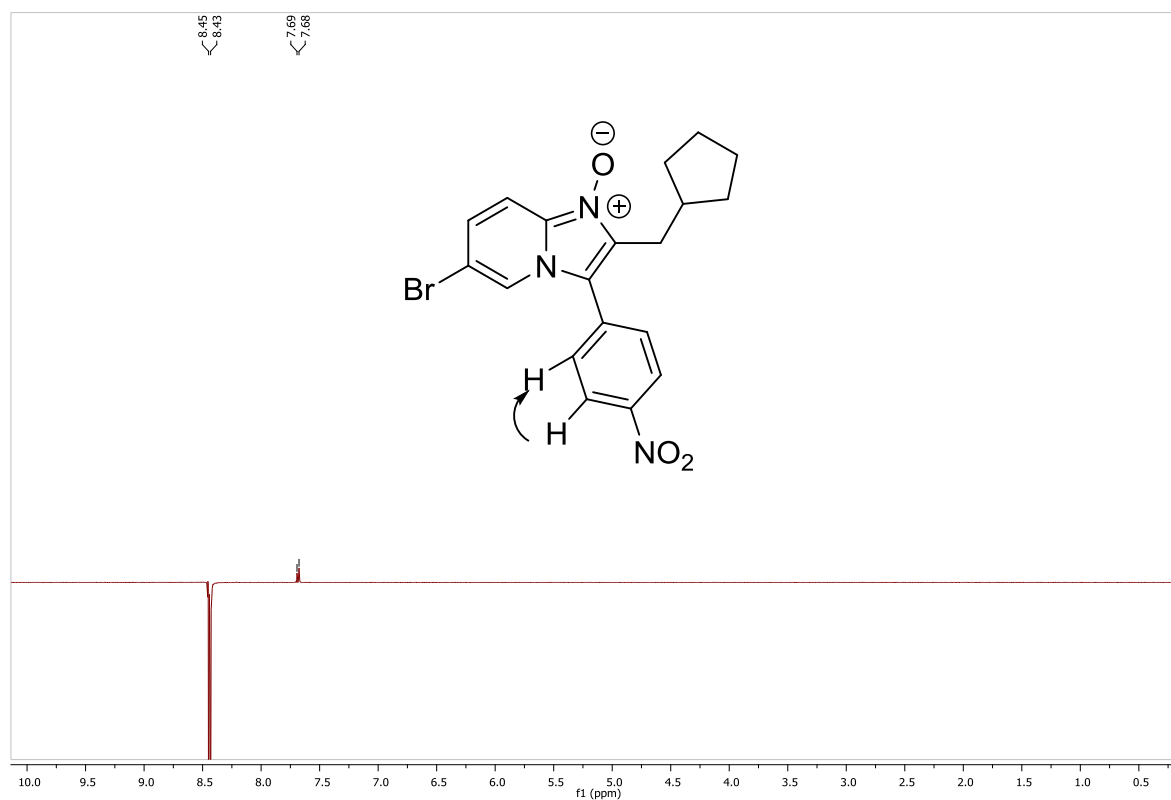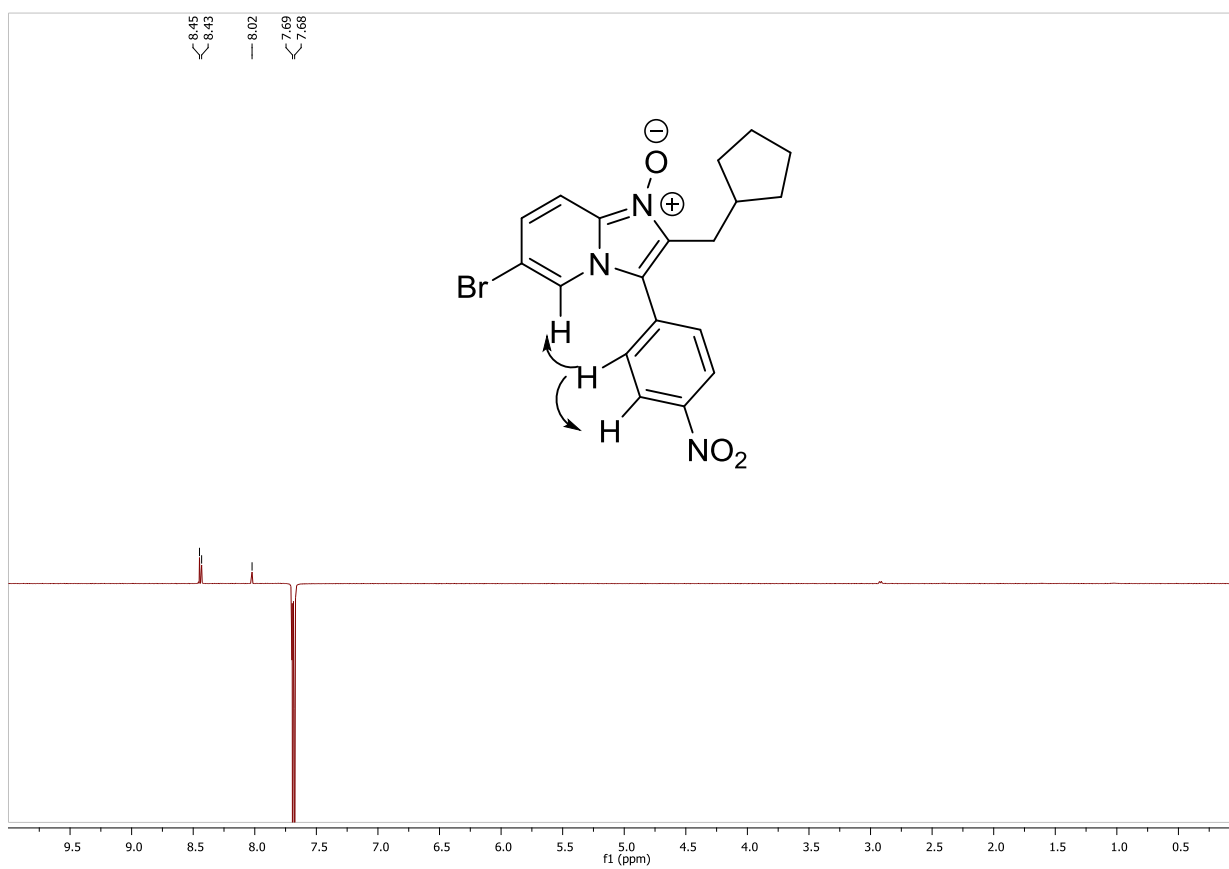

(3x)

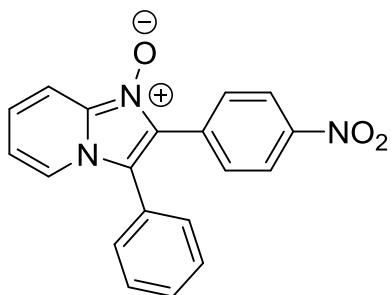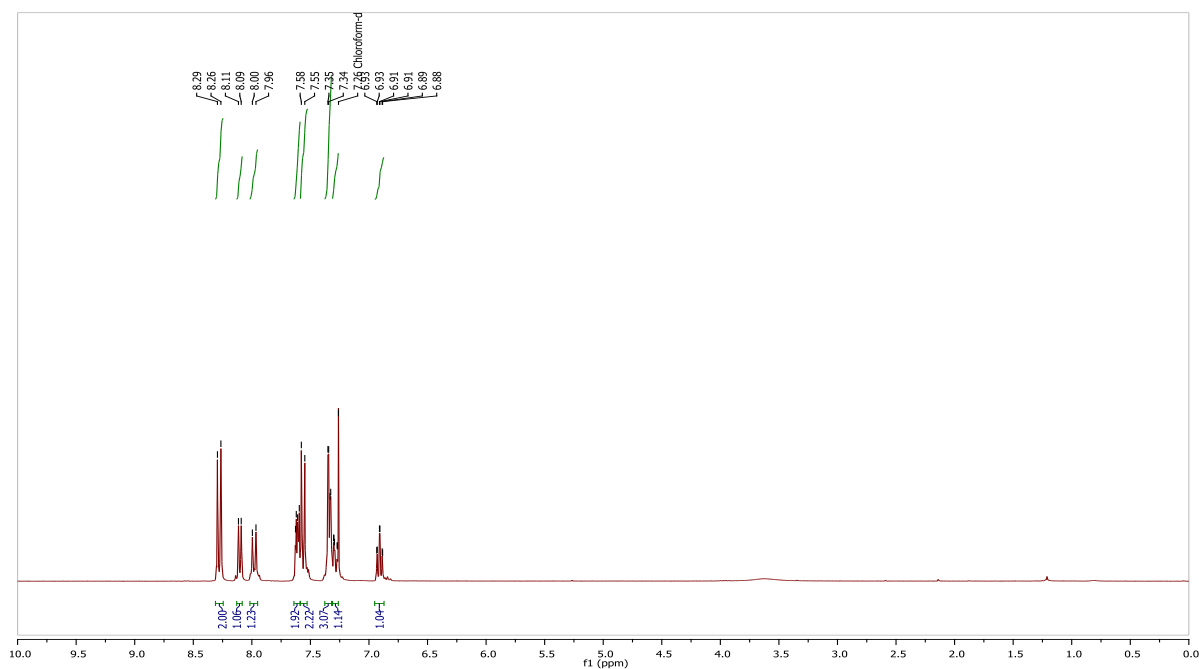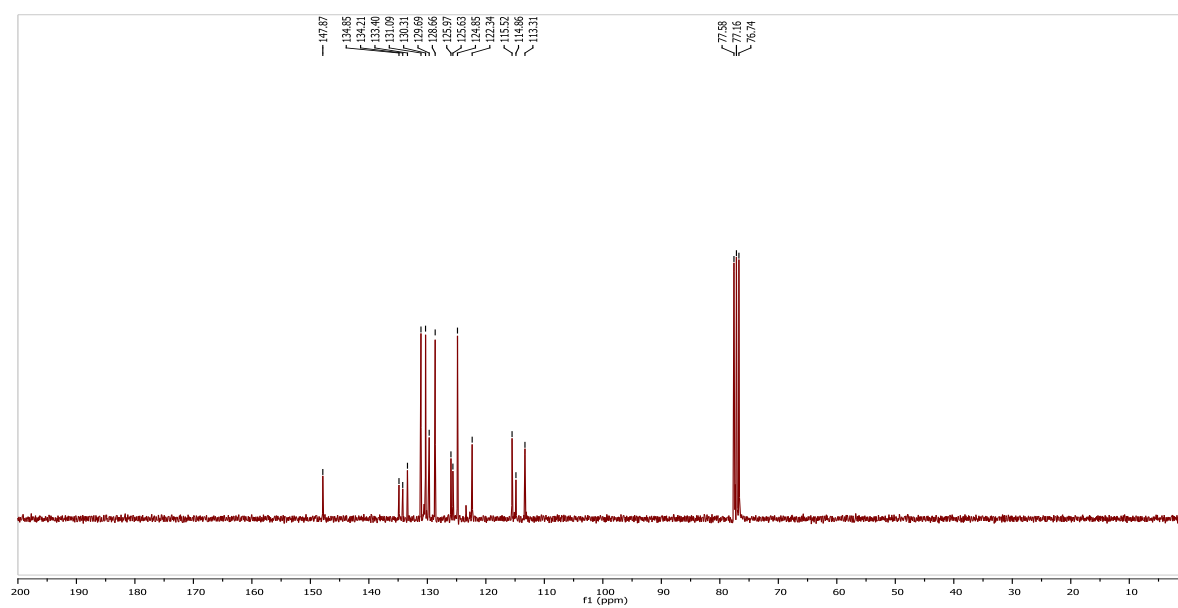

(3y)

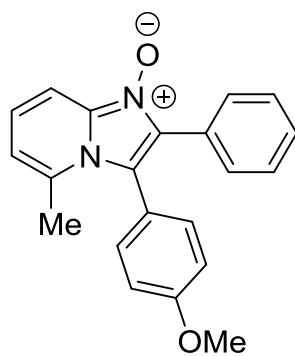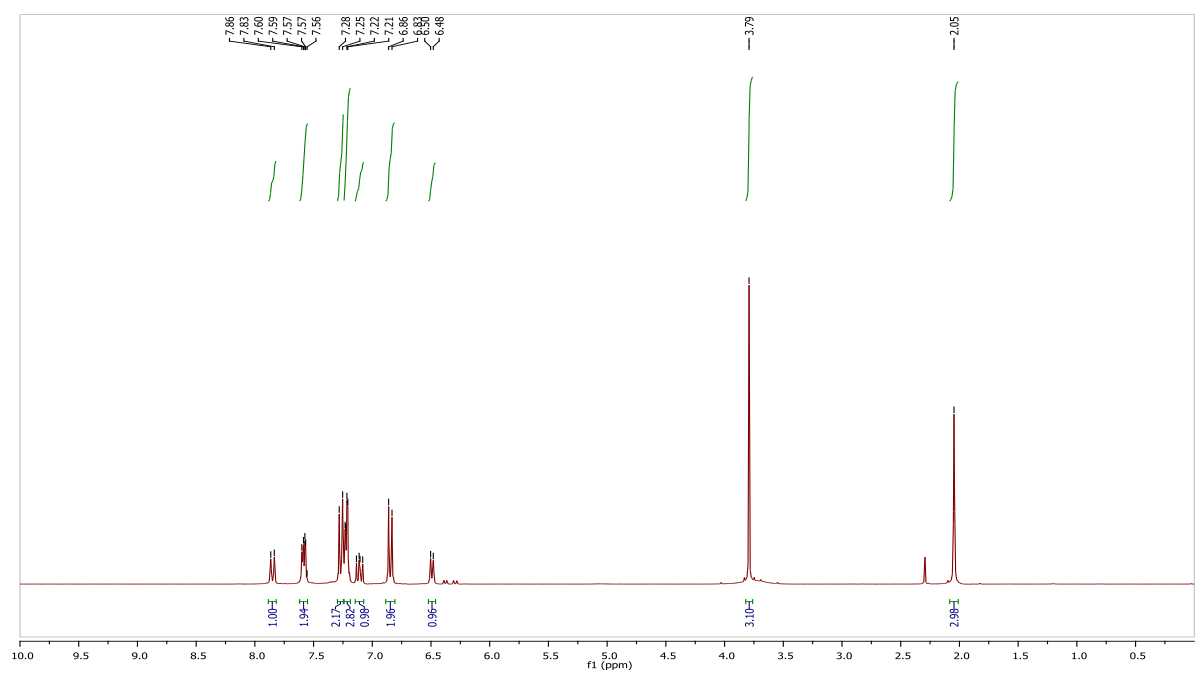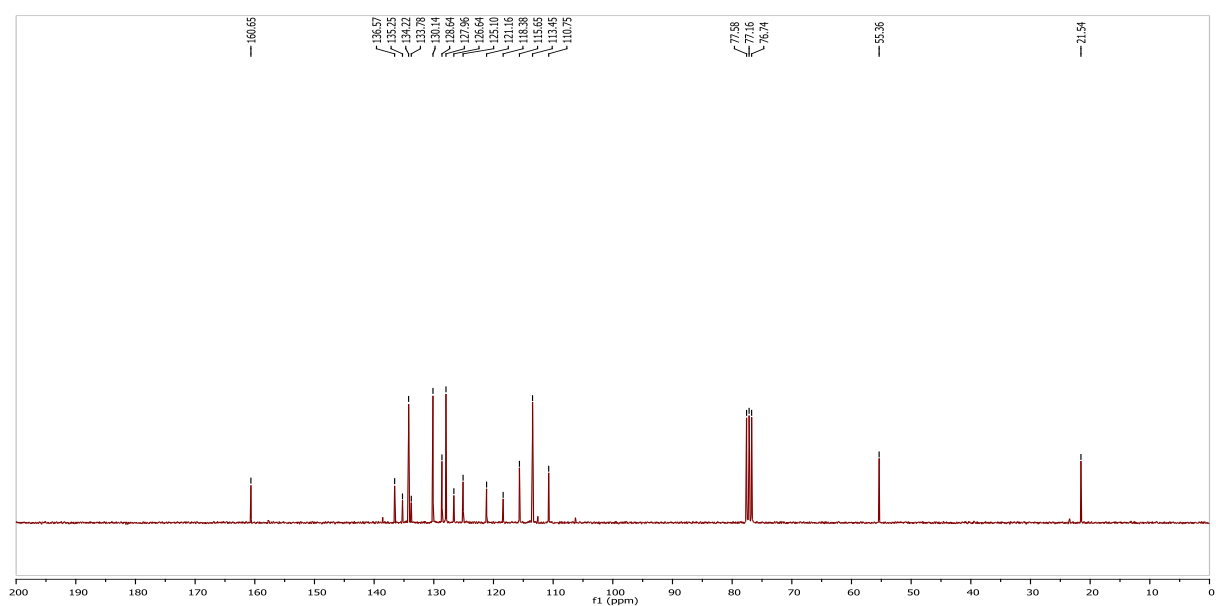

# NOE of 3y

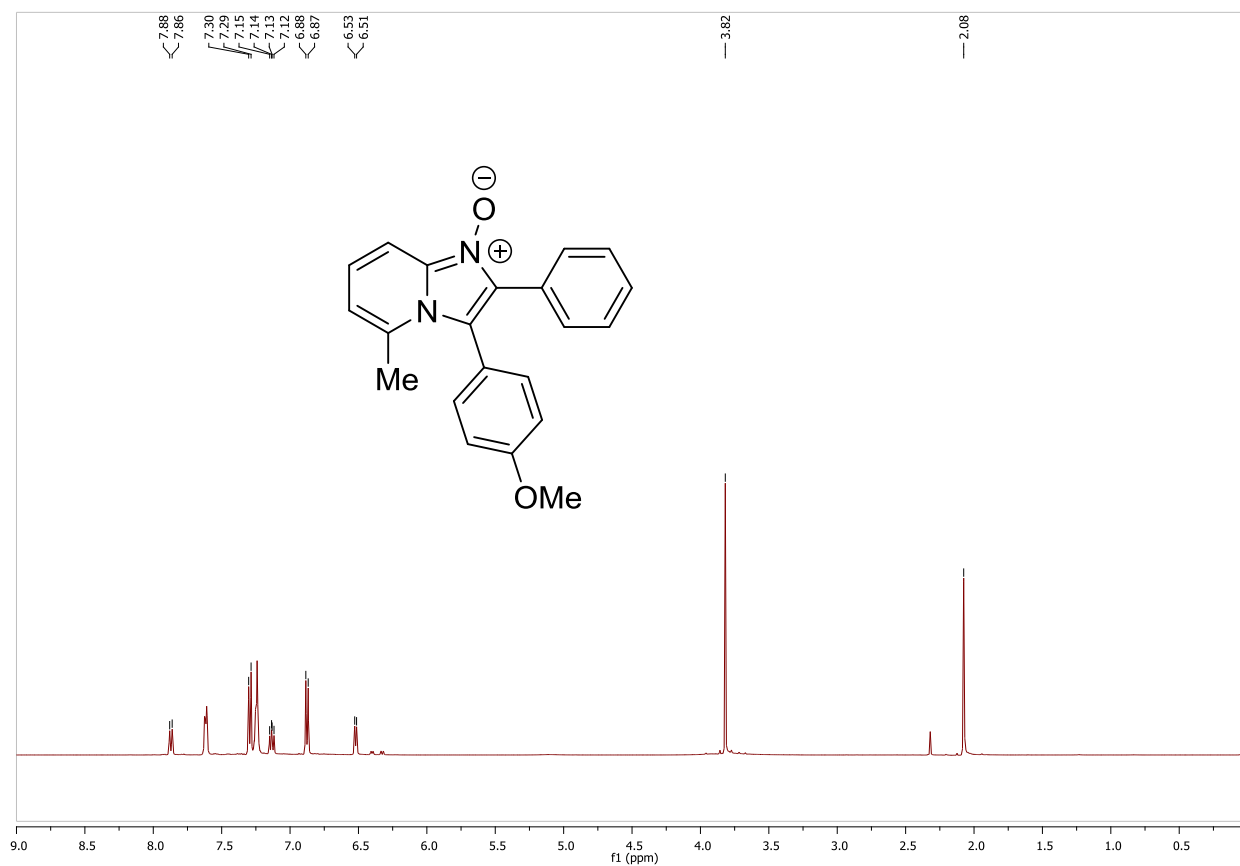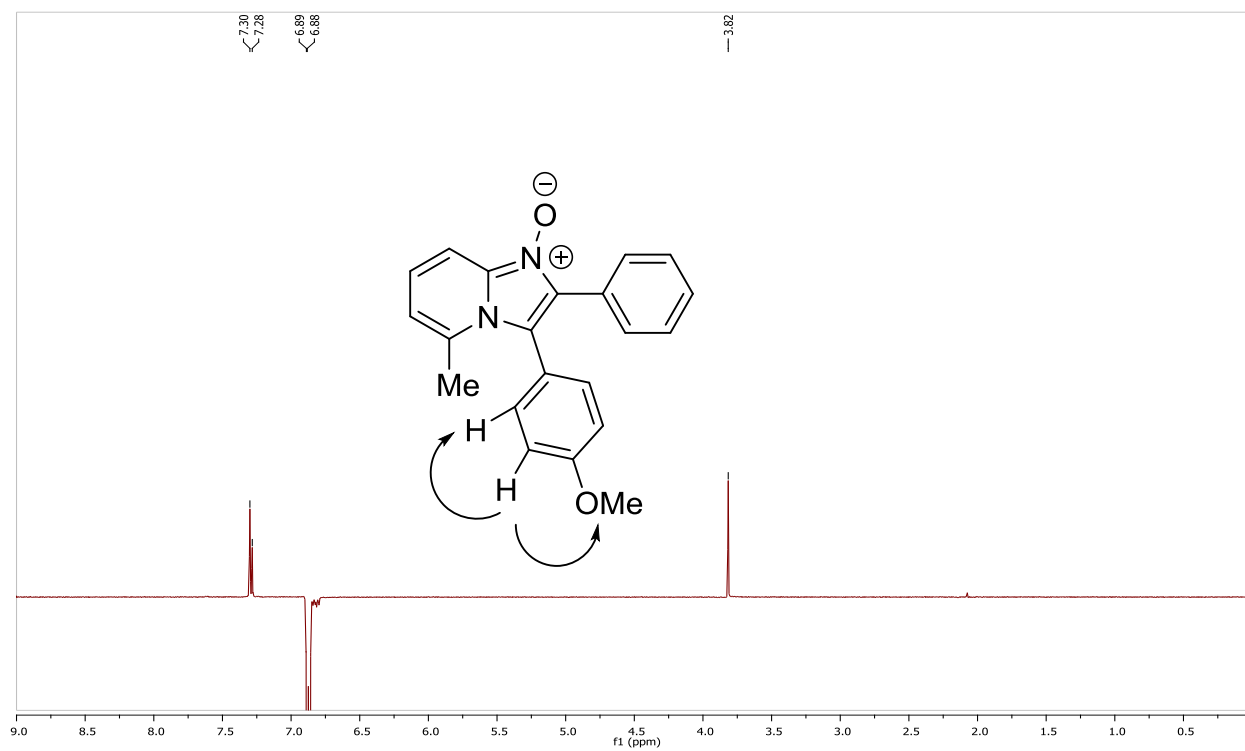

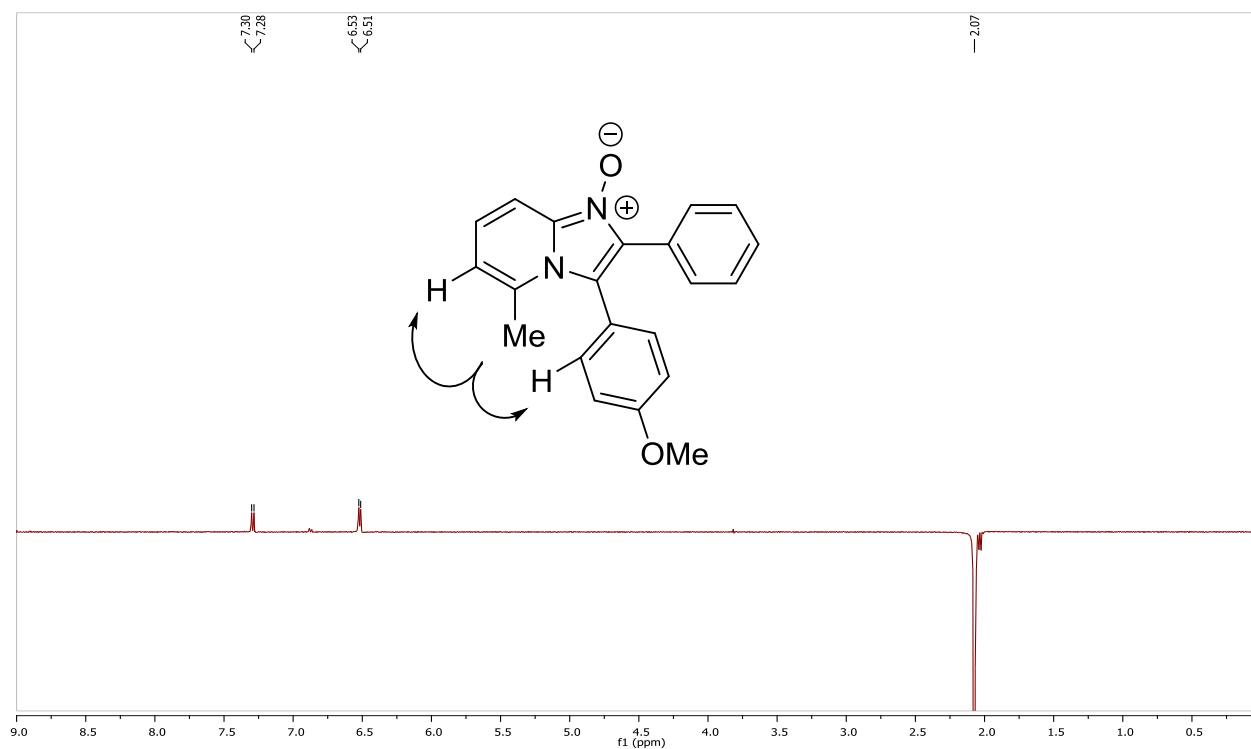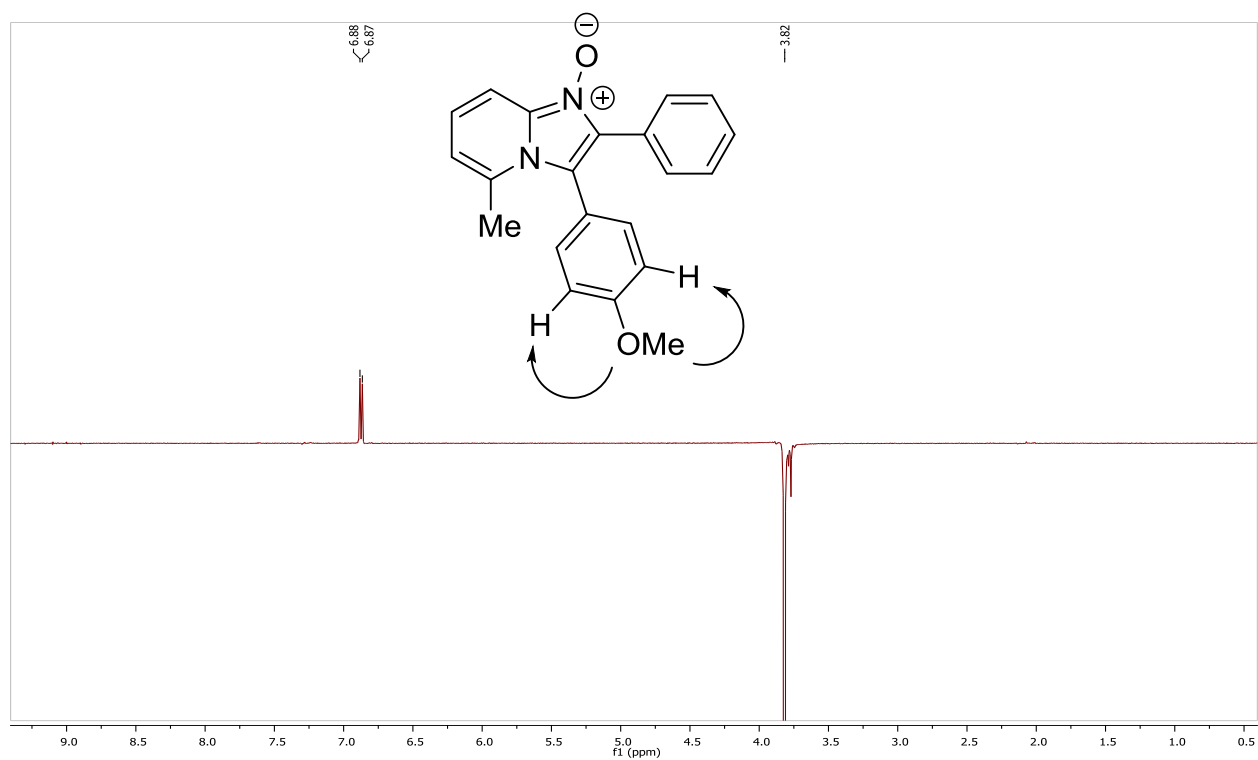



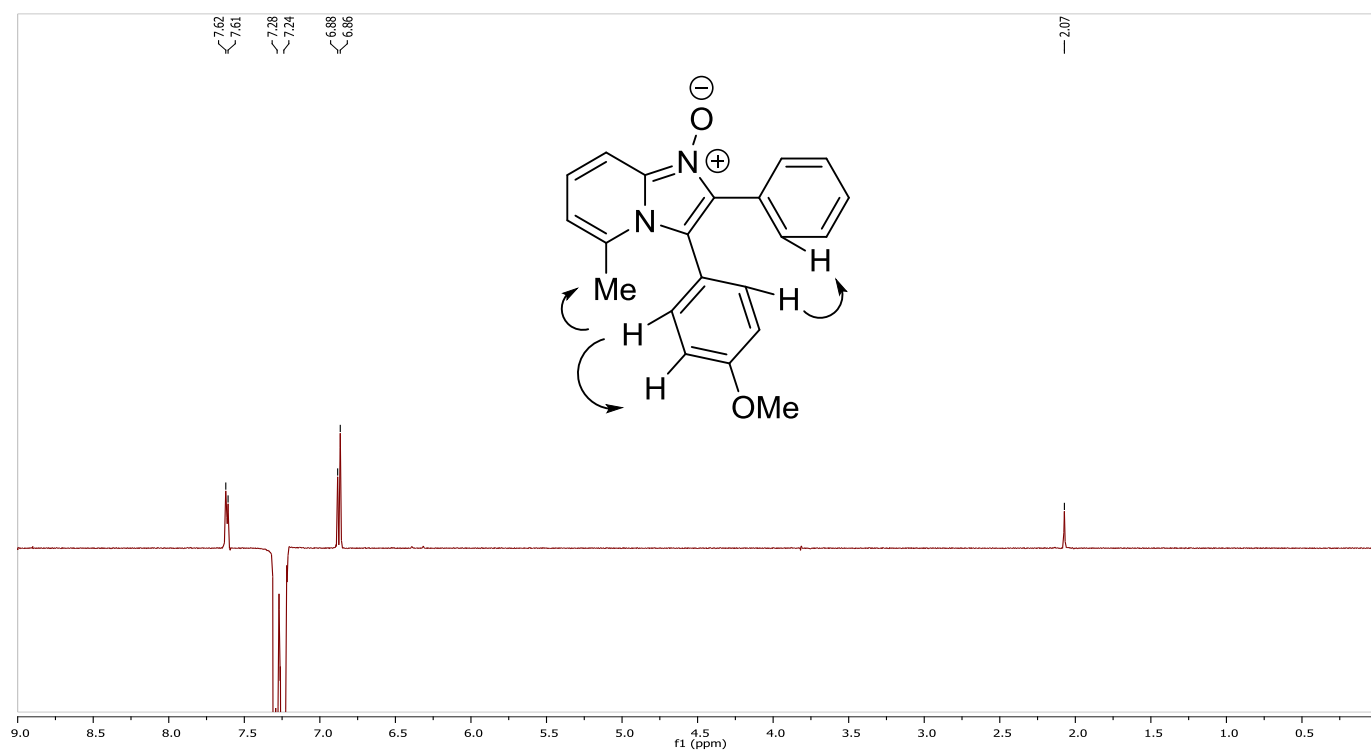

(3z)

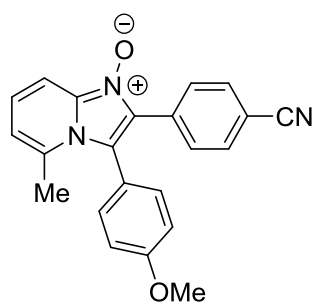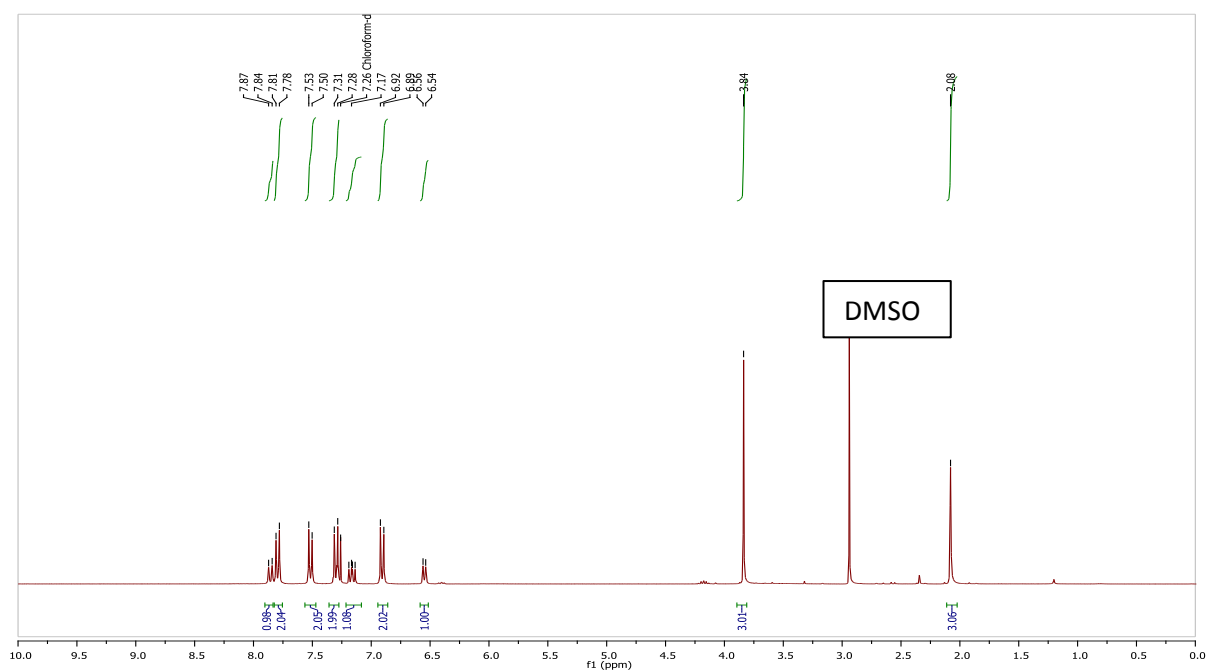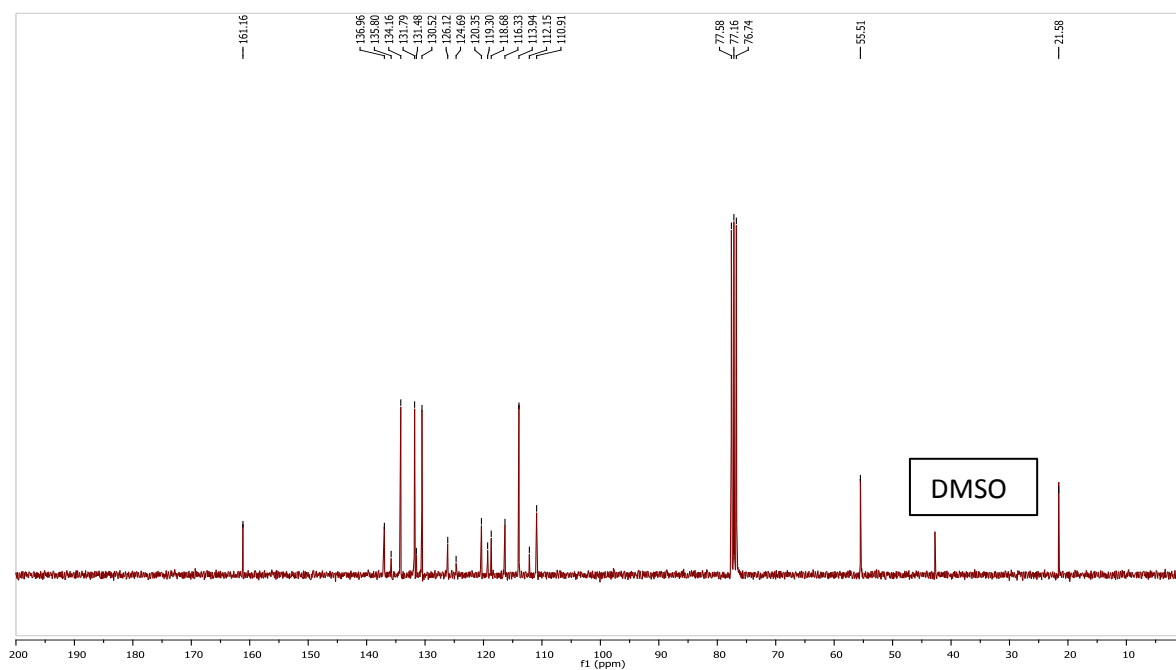

# NOE of 3z

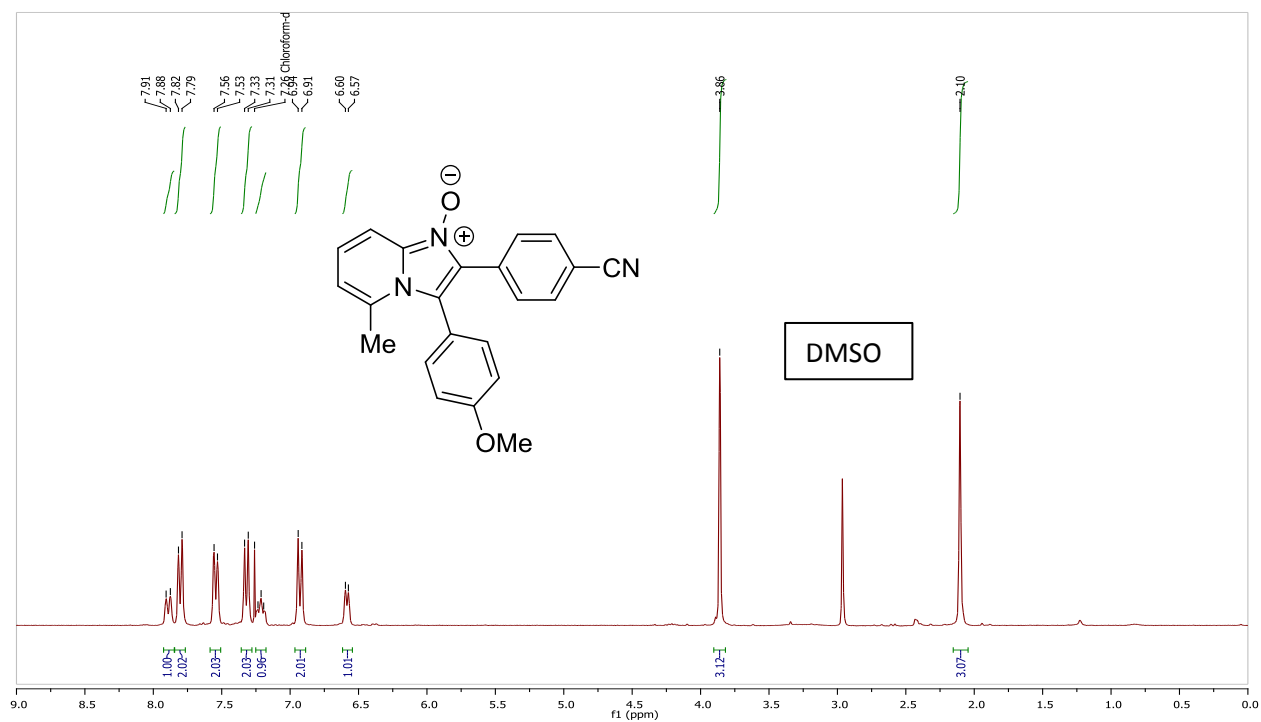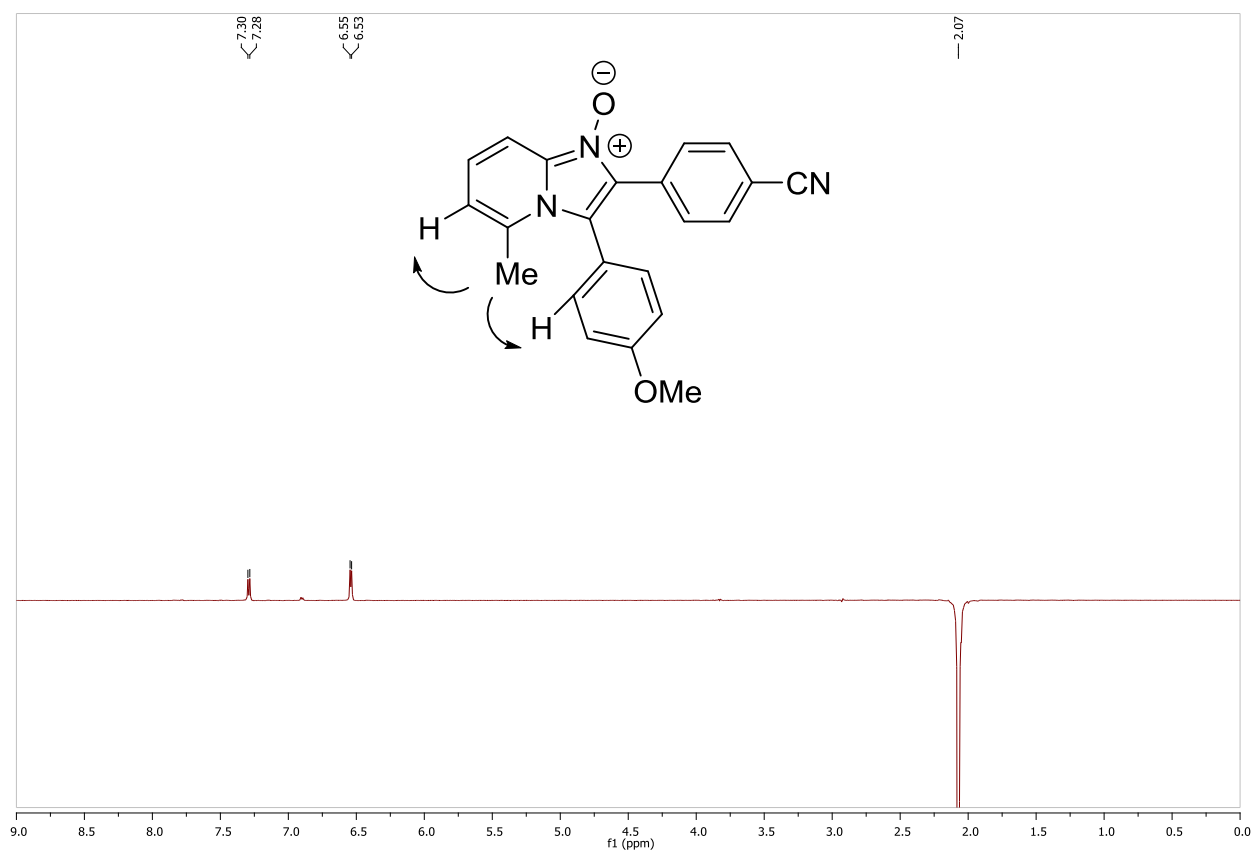

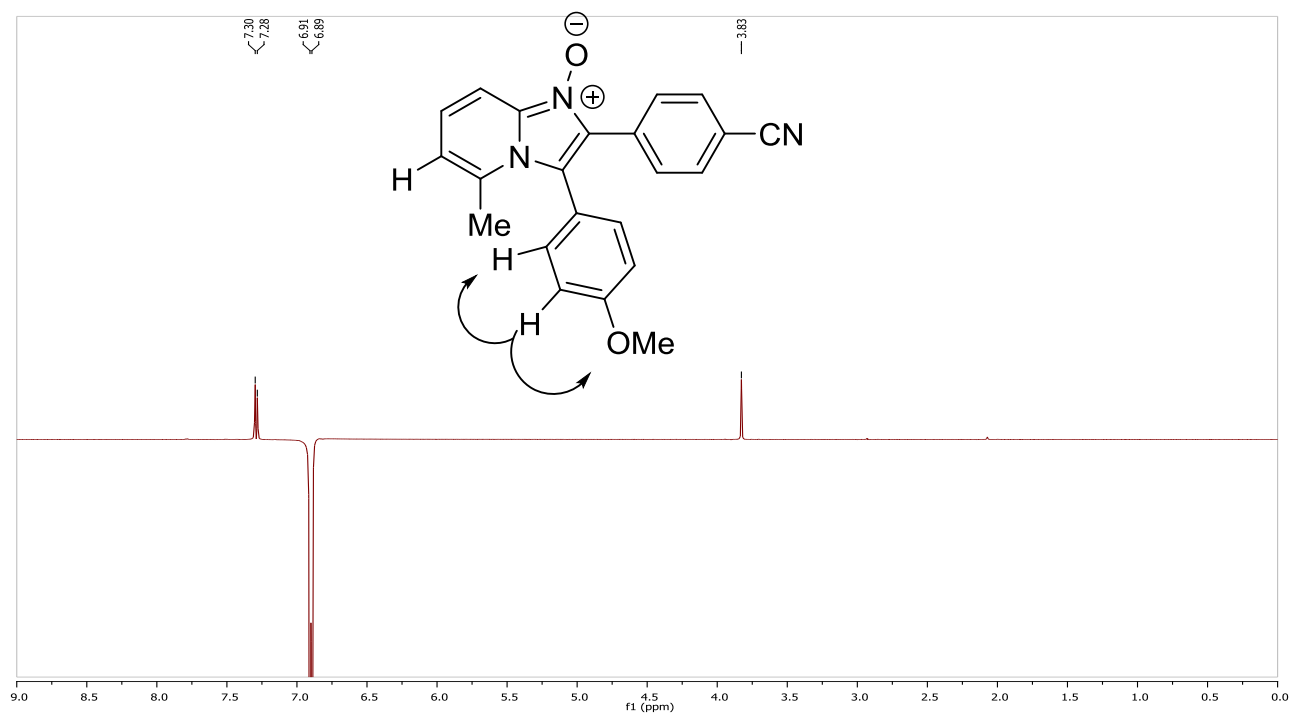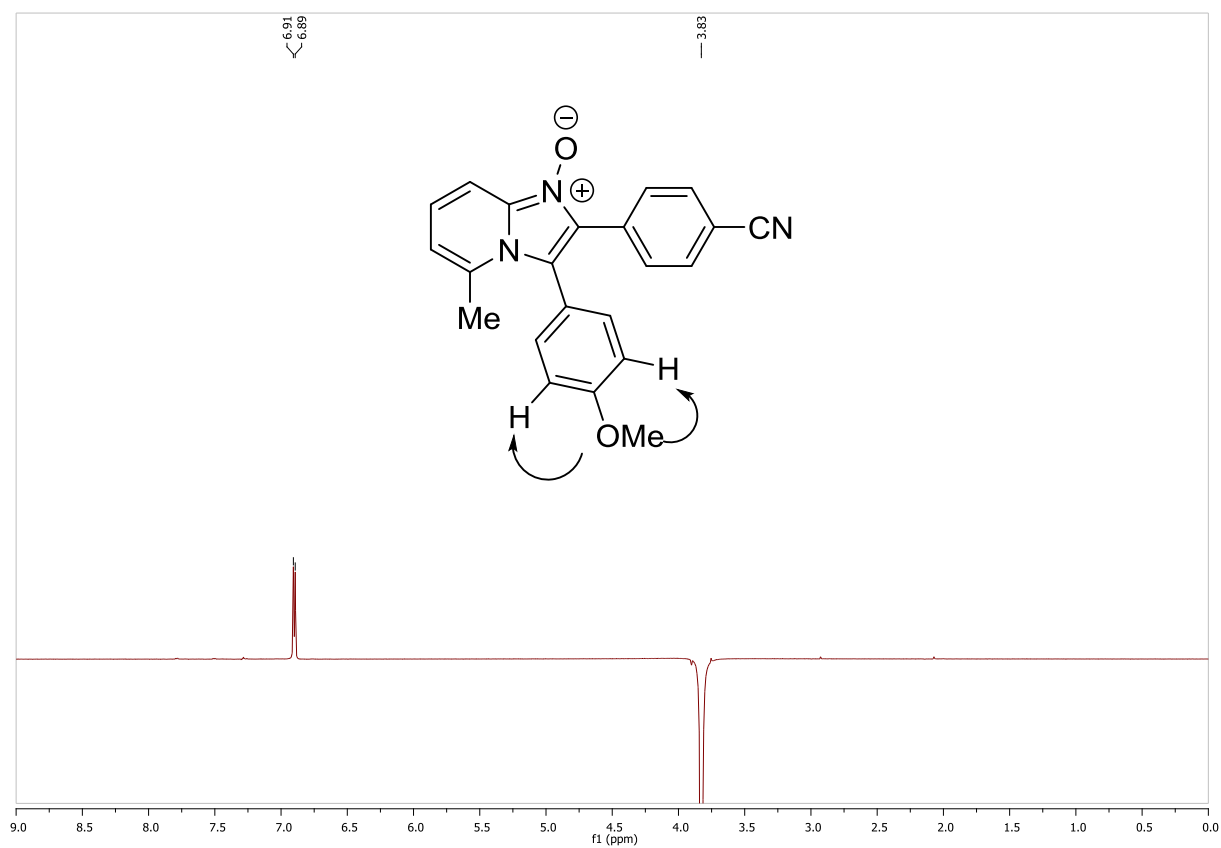

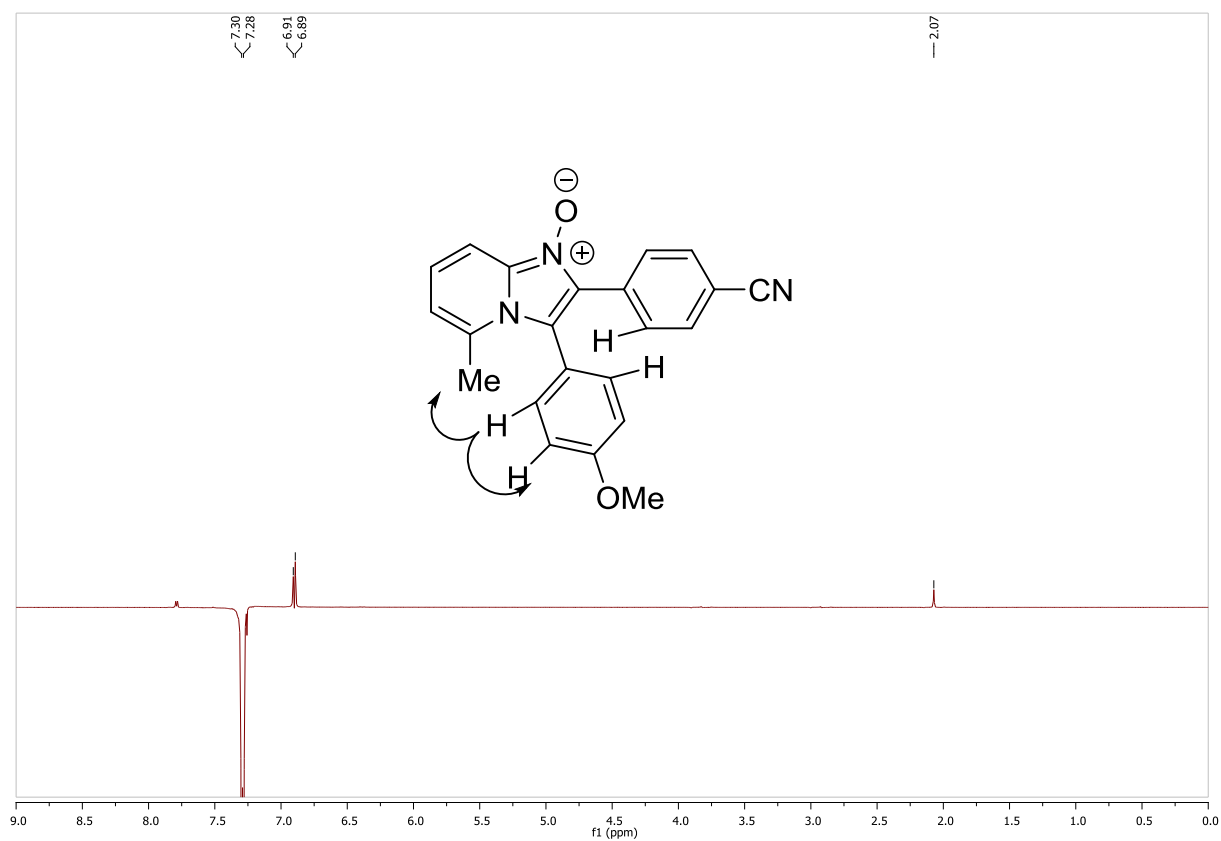

(3aa)

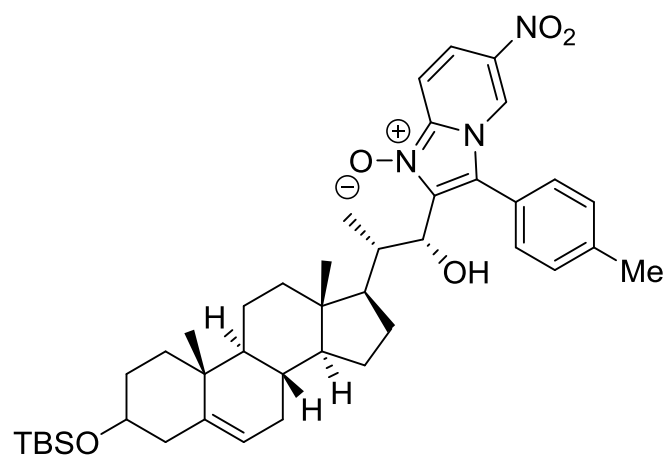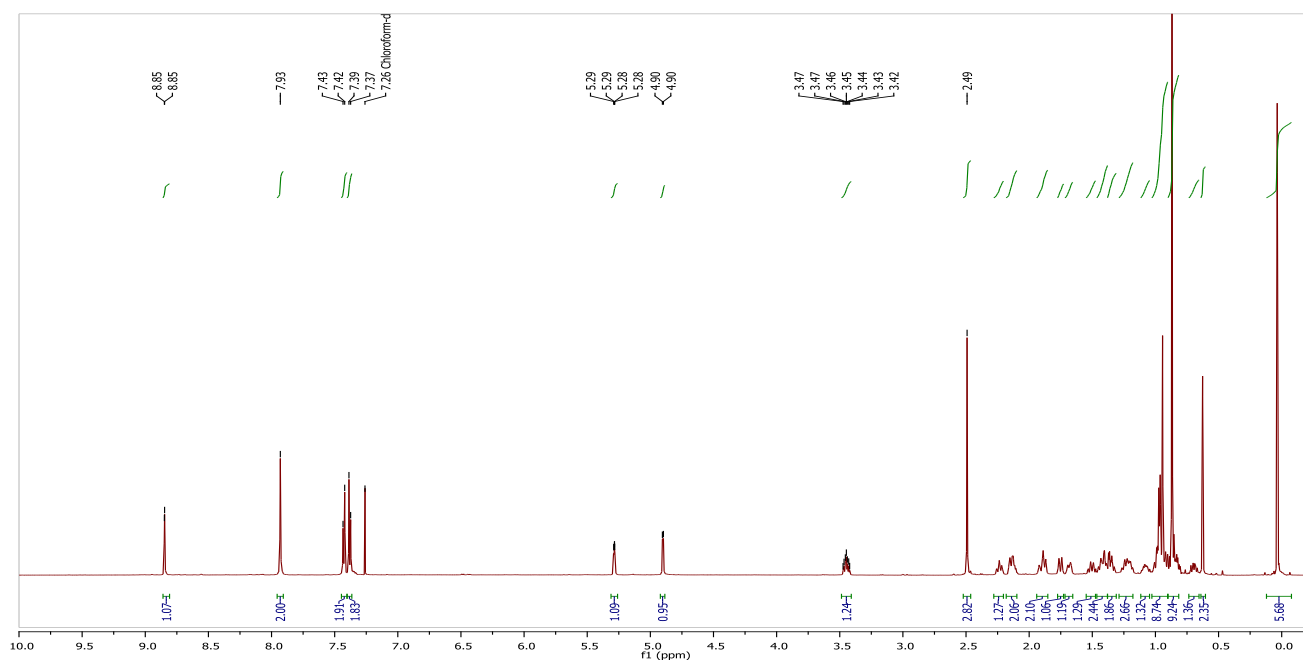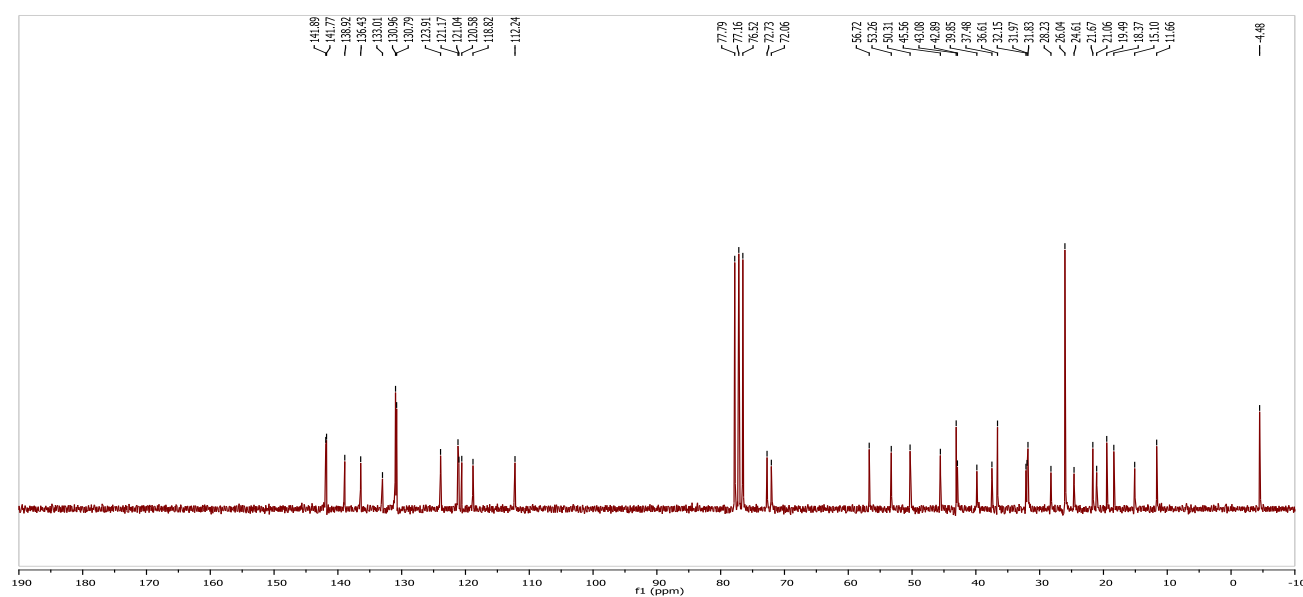

# NOE of 3aa

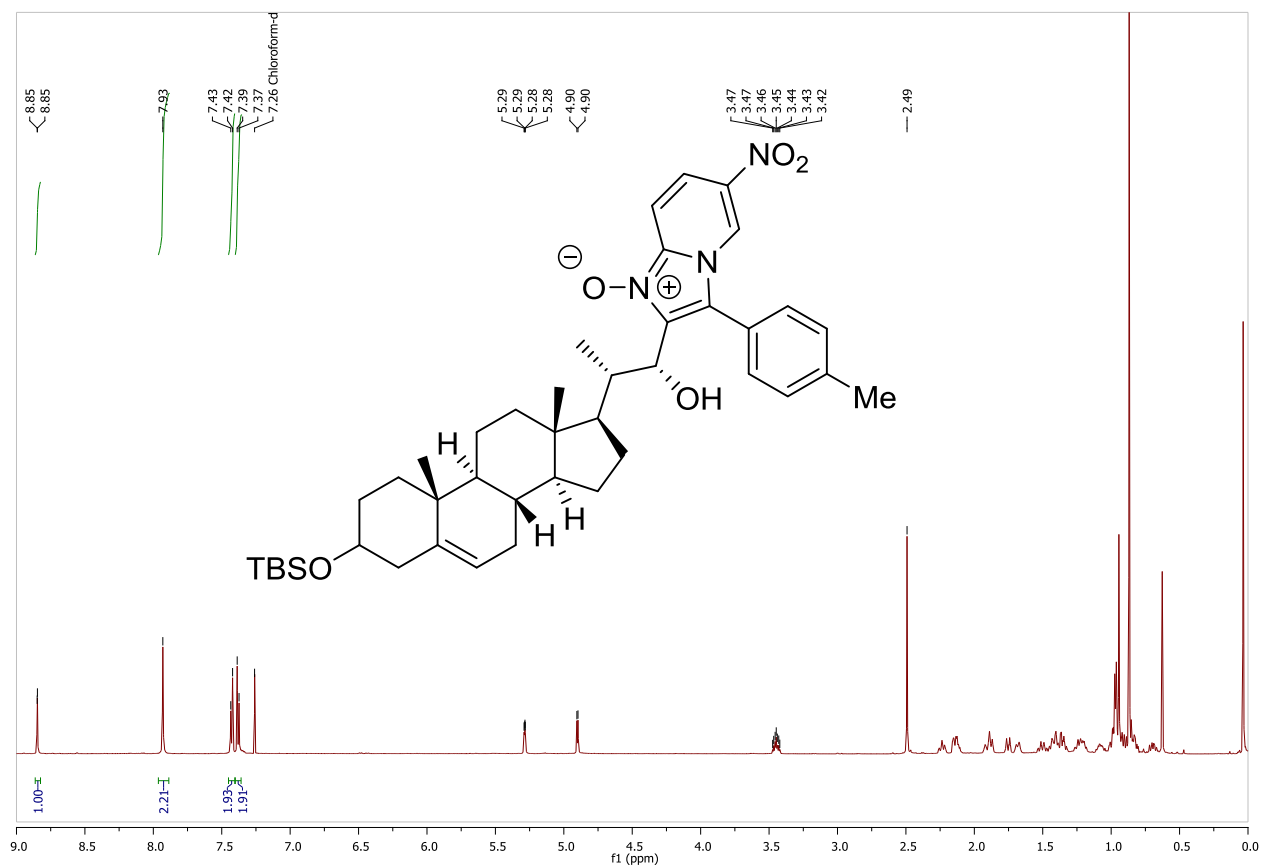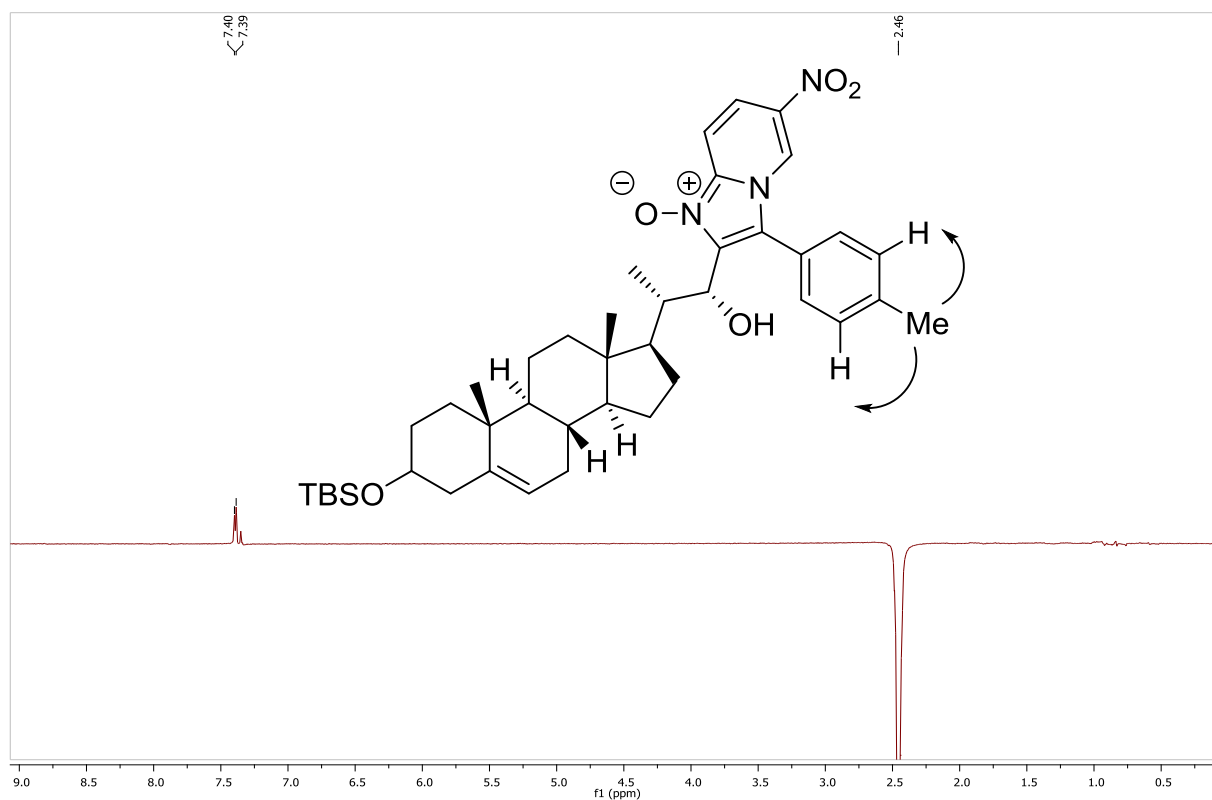

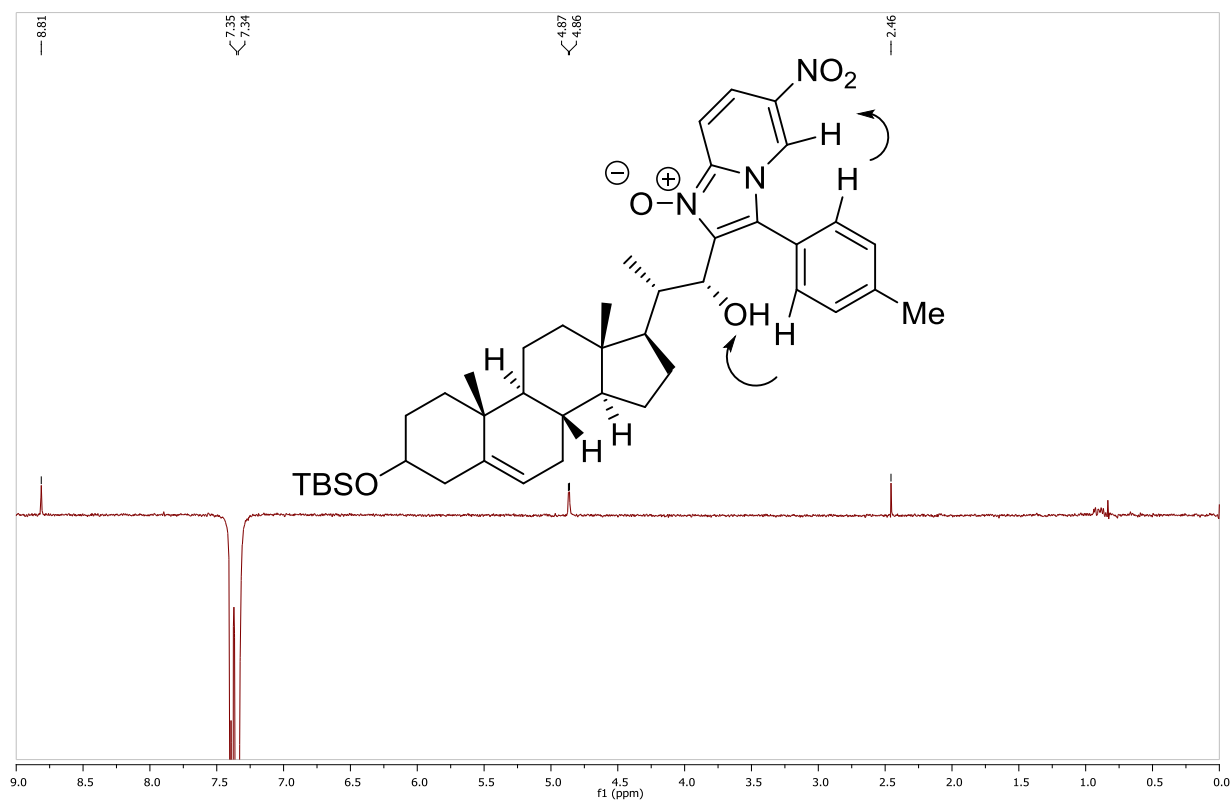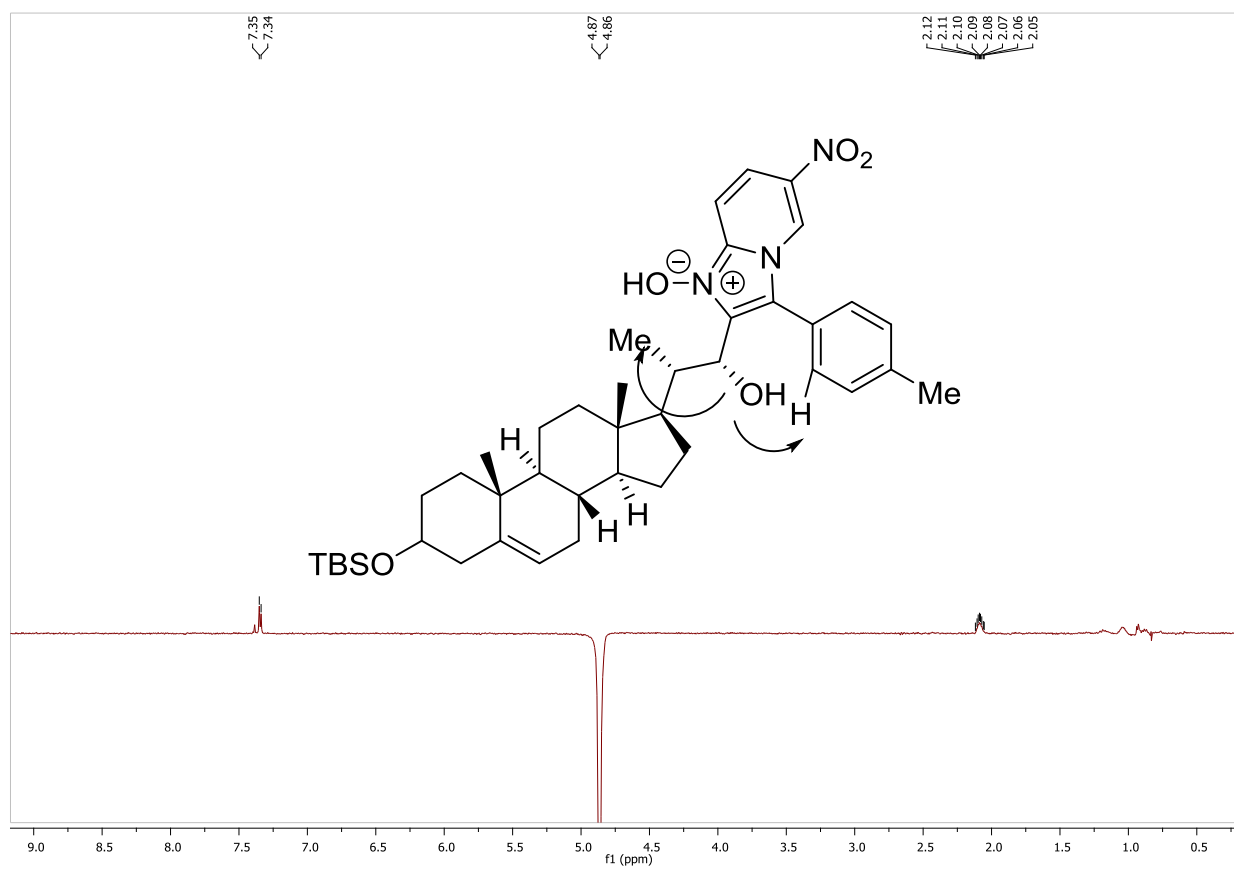



(3ab)

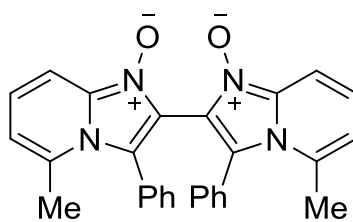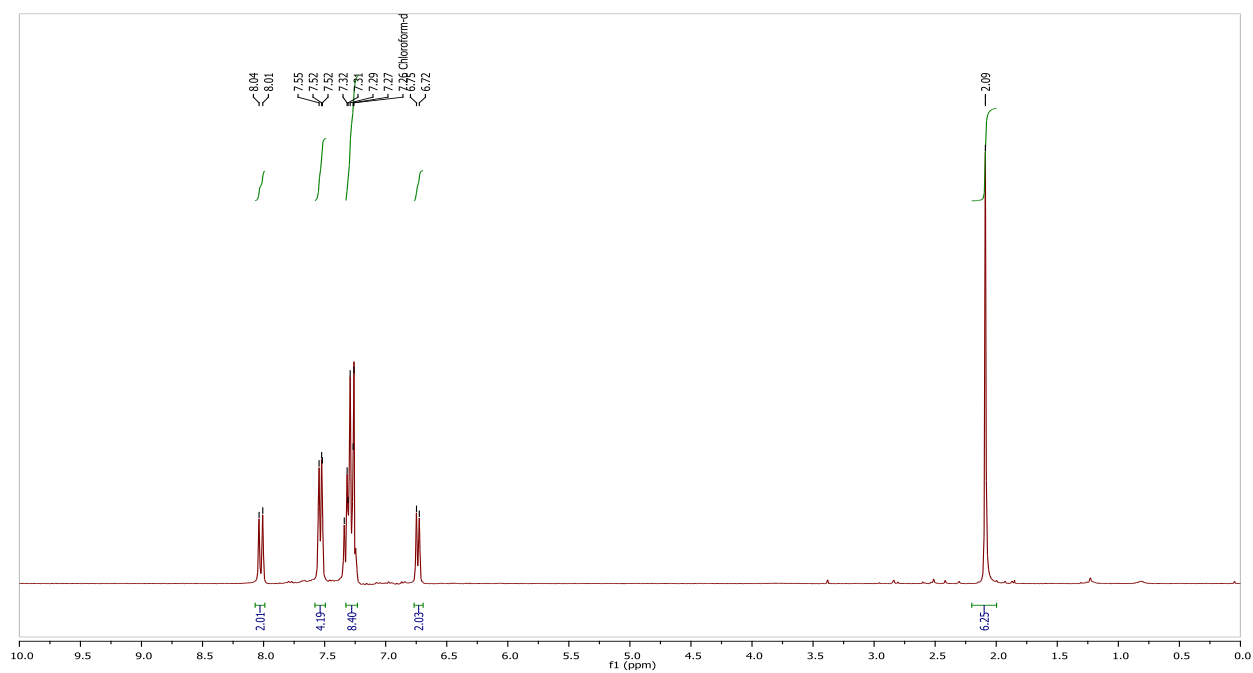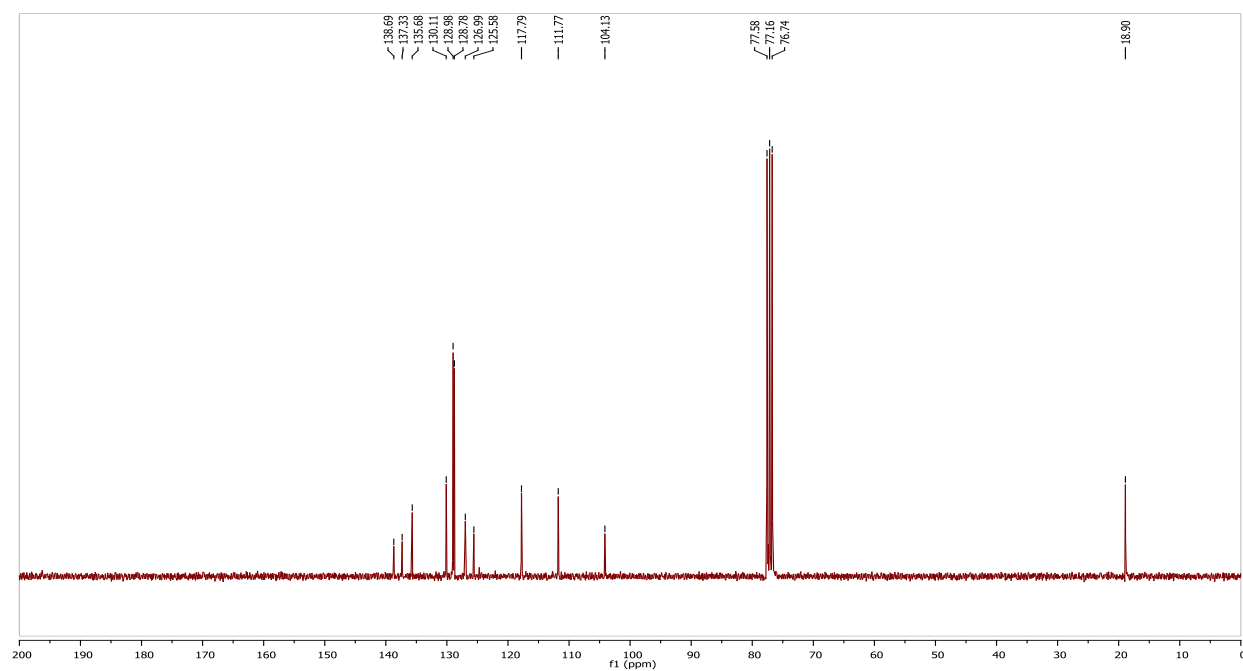

(4a)

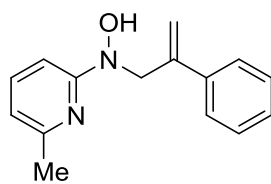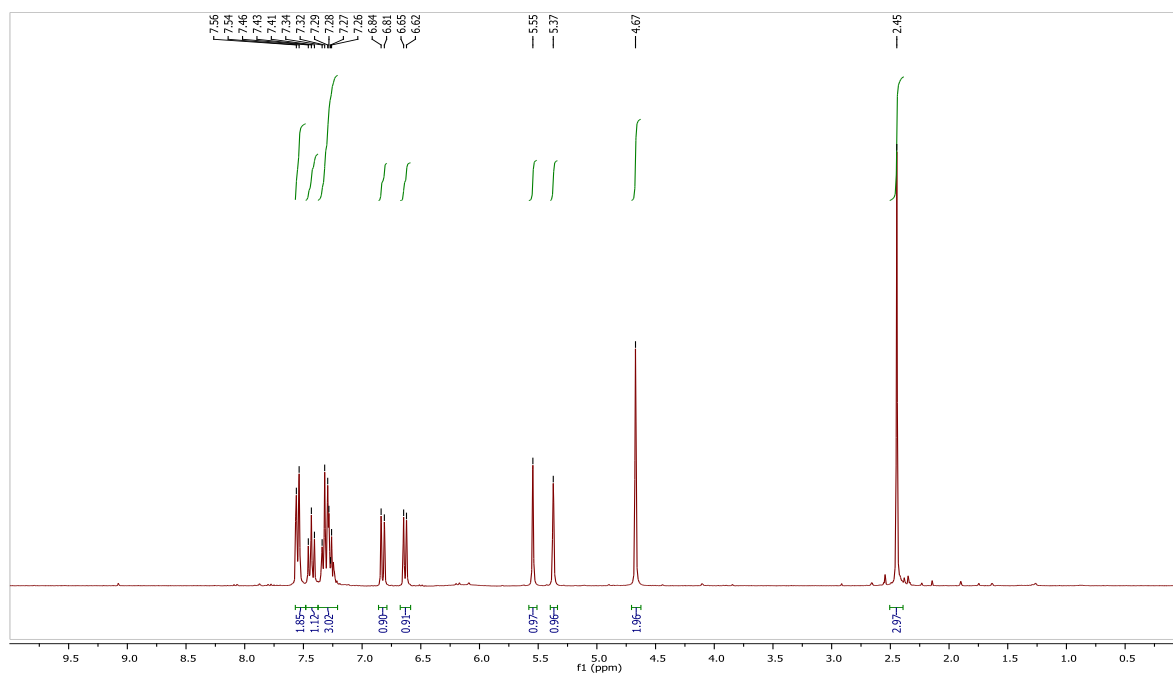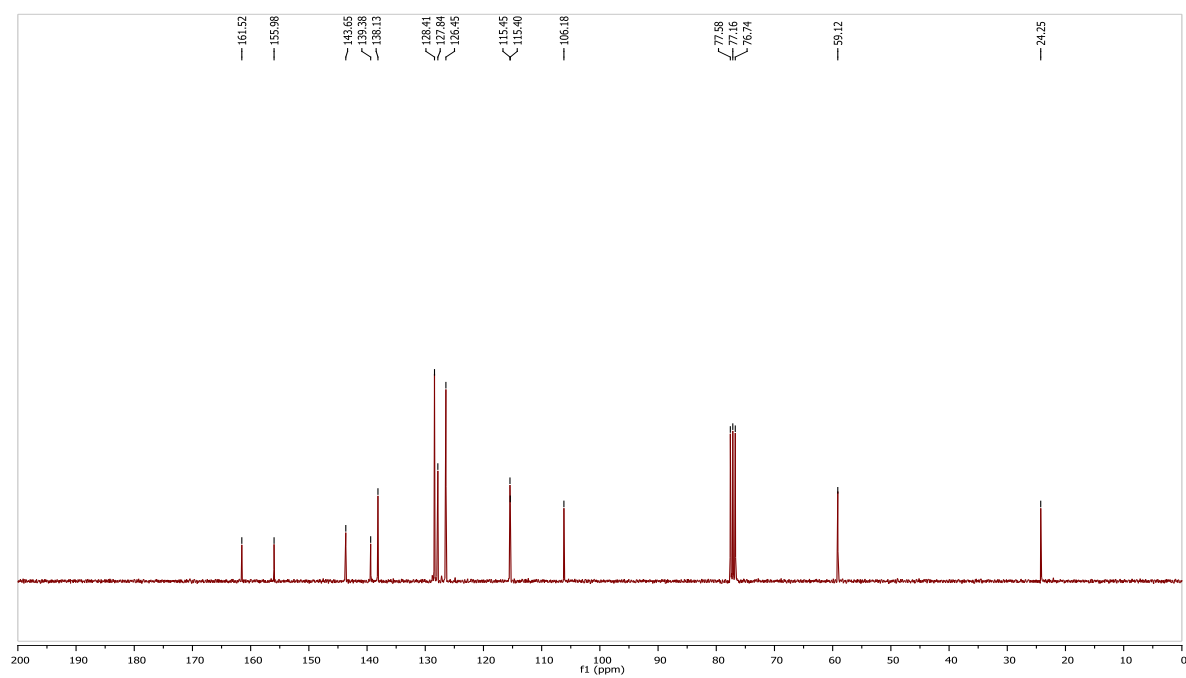

(4b)

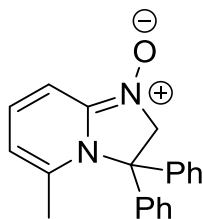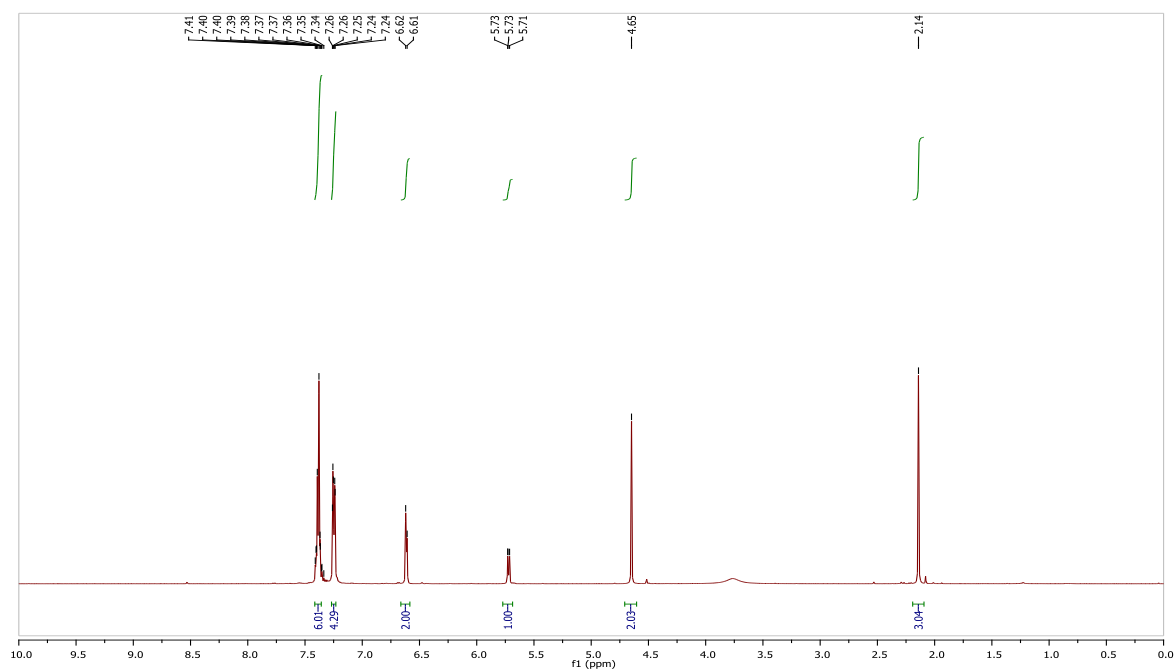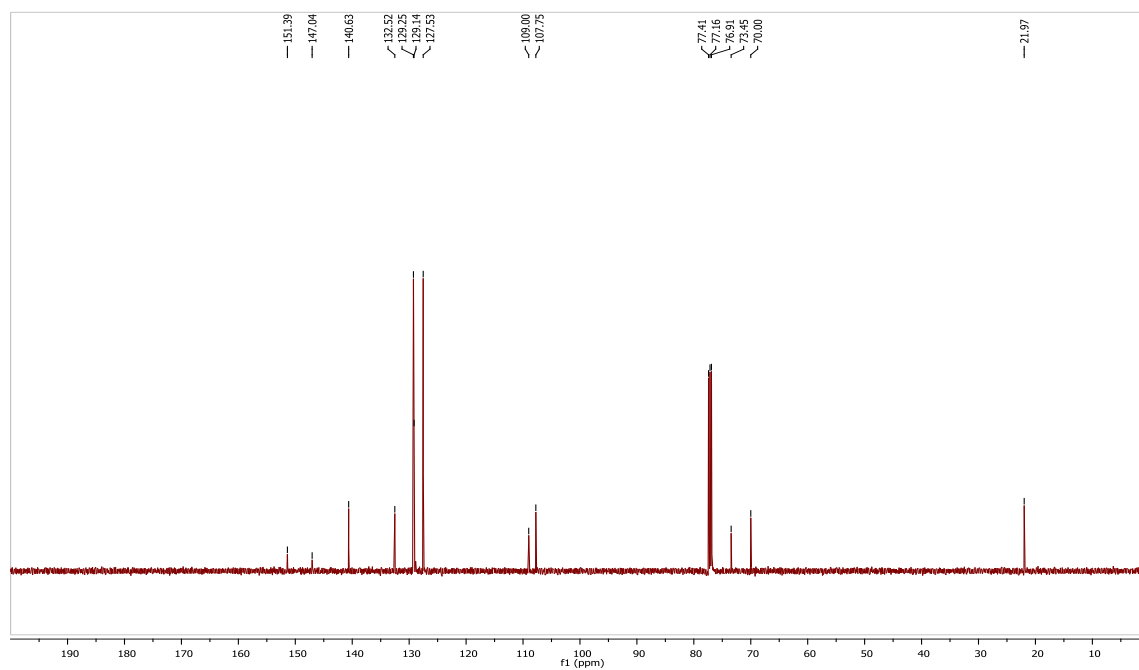

(5a)

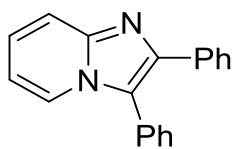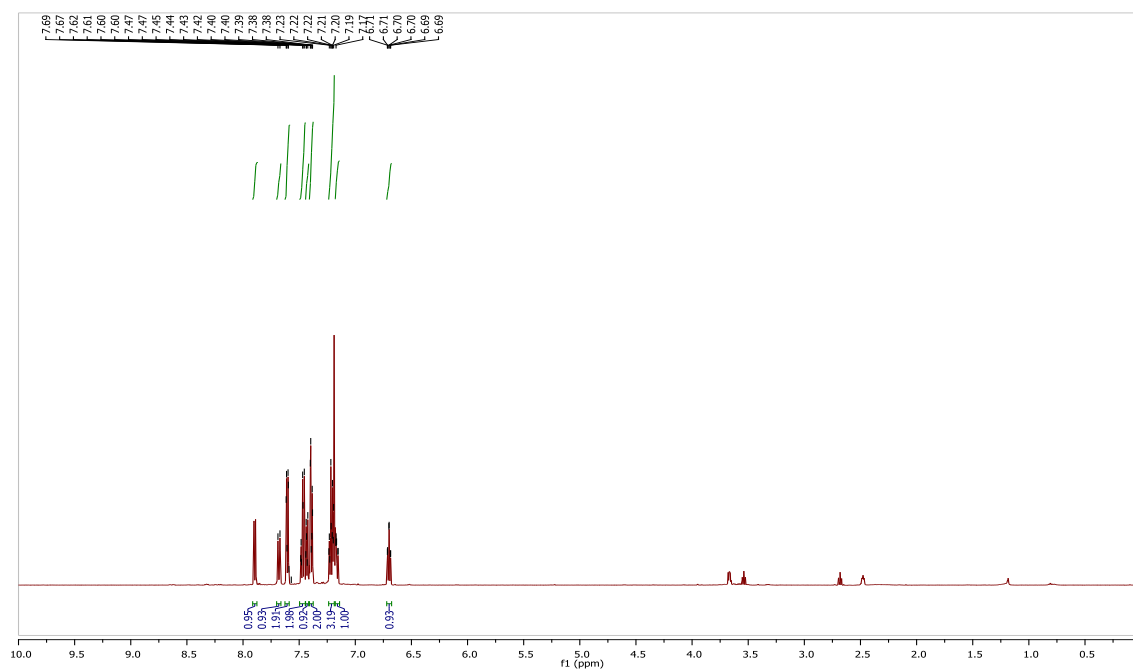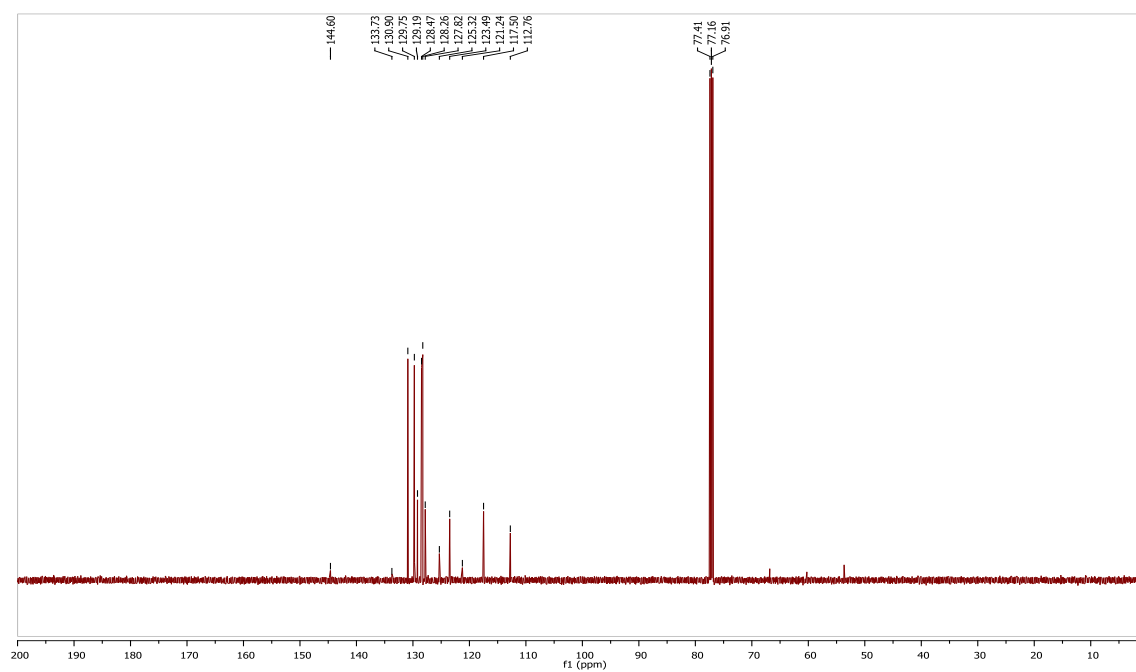

(5b)

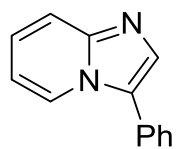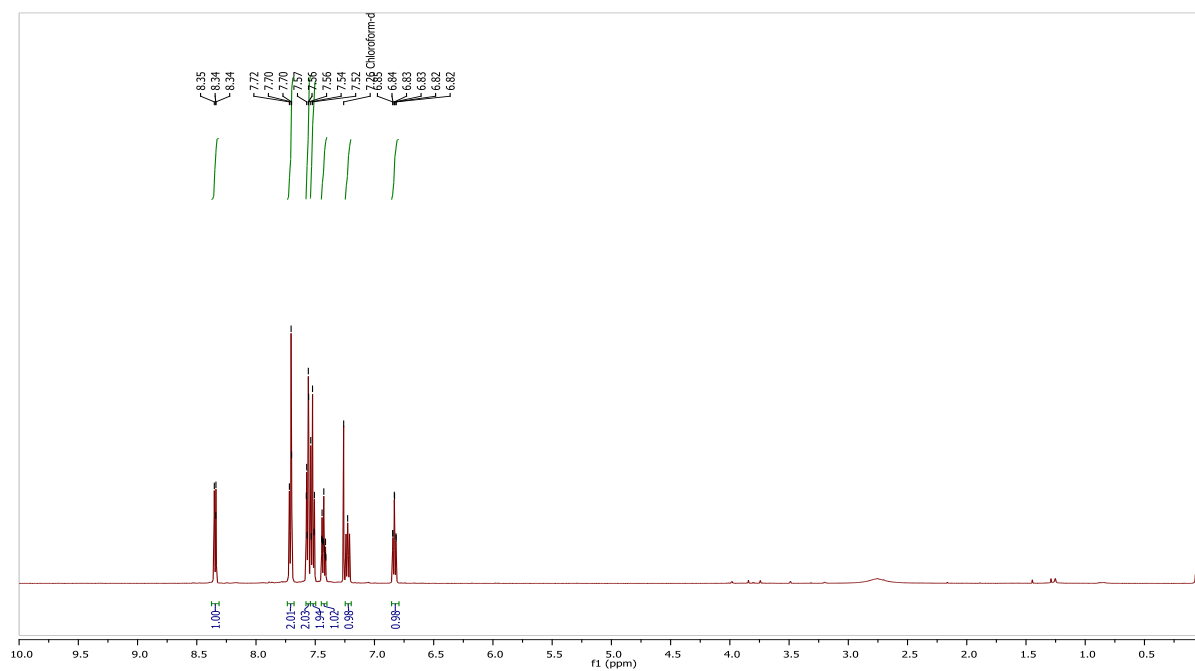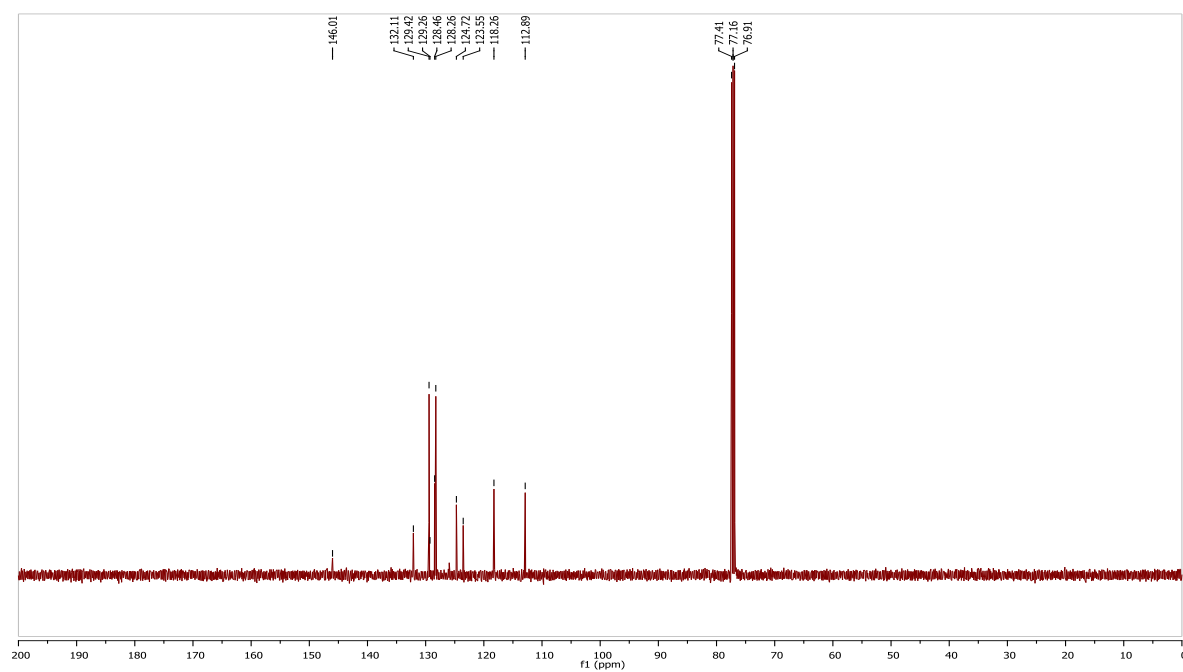

(5c)

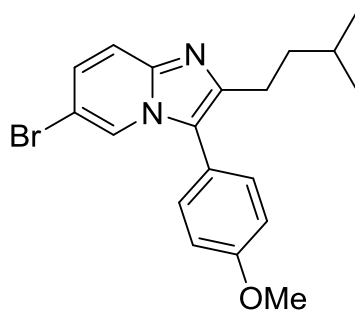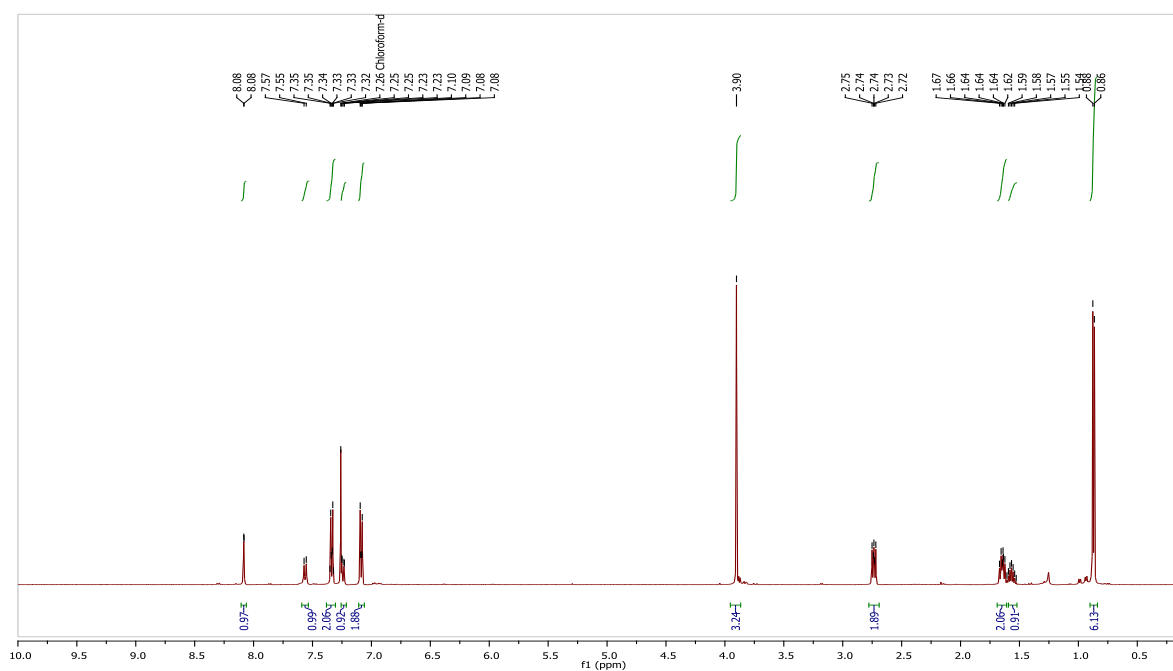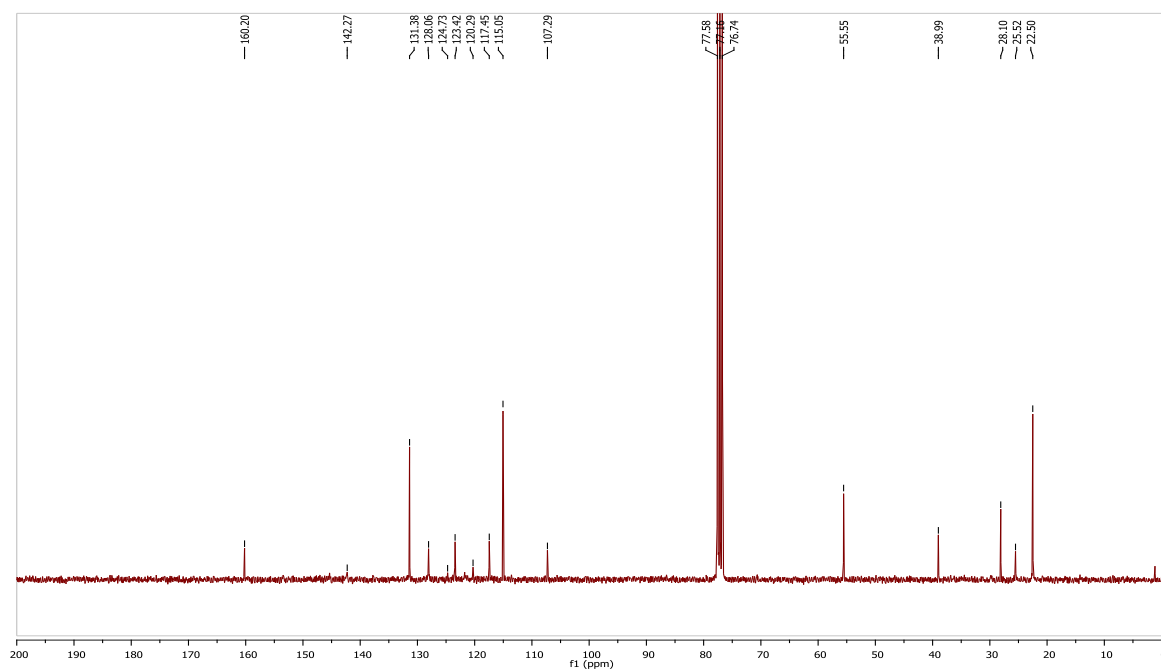

Supplement: c5cc00533g1.pdf [file c5cc00533g1.pdf]
